# Supplementary material for: The Identification of a Yield-Related Gene Controlling Multiple Traits Using GWAS in Sorghum (Sorghum bicolor L.)
Source: Plants (Basel). 2023 Apr 4;12(7):1557. doi: 10.3390/plants12071557 (PMC10097259; doi:10.3390/plants12071557)
Supplement: Supplementary file 1 [file plants-12-01557-s001.zip]

Archive with 10 entries (10 files):
- Supplementary Data.pdf
- Table S1.xlsx
- Table S2.xlsx
- Table S3.xlsx
- Table S4.xlsx
- Table S5.xlsx
- Table S6.xlsx
- Table S7.xlsx
- Table S8.xlsx
- Table S9.xlsx
