# Supplementary material for: The Identification of a Yield-Related Gene Controlling Multiple Traits Using GWAS in Sorghum (Sorghum bicolor L.)
Source: Plants (Basel). 2023 Apr 4;12(7):1557. doi: 10.3390/plants12071557 (PMC10097259; doi:10.3390/plants12071557)
Supplement: Supplementary file 1 [file plants-12-01557-s001.zip › Table S1.xlsx]

## Sheet: Table S1
Table S1 The list of all 214 landraces.
Variety name	Source	Providing institutions
Saccaline	Japan	Sorghum Germplasm Resource Conservation Bank of Sorghum Research Institute of Shanxi Agricultural University
Double Grain Sorghum	Anhui, China	Sorghum Germplasm Resource Conservation Bank of Sorghum Research Institute of Shanxi Agricultural University
Dval	Japan	Sorghum Germplasm Resource Conservation Bank of Sorghum Research Institute of Shanxi Agricultural University
Black Hull Sorghum	Henan, China	Sorghum Germplasm Resource Conservation Bank of Sorghum Research Institute of Shanxi Agricultural University
IS 1159C	India	Sorghum Germplasm Resource Conservation Bank of Sorghum Research Institute of Shanxi Agricultural University
Jinliang No.5	Shanxi, China	Sorghum Germplasm Resource Conservation Bank of Sorghum Research Institute of Shanxi Agricultural University
Sugar Sorghum(Chaoxian)	Anhui, China	Sorghum Germplasm Resource Conservation Bank of Sorghum Research Institute of Shanxi Agricultural University
Sugar Sorghum	Anhui, China	Sorghum Germplasm Resource Conservation Bank of Sorghum Research Institute of Shanxi Agricultural University
Early Hegari SA #281	U.S.A	Sorghum Germplasm Resource Conservation Bank of Sorghum Research Institute of Shanxi Agricultural University
Tx3197B	U.S.A	Sorghum Germplasm Resource Conservation Bank of Sorghum Research Institute of Shanxi Agricultural University
Cock Feterita	U.S.A	Sorghum Germplasm Resource Conservation Bank of Sorghum Research Institute of Shanxi Agricultural University
IS 9308	India	Sorghum Germplasm Resource Conservation Bank of Sorghum Research Institute of Shanxi Agricultural University
Yellow Sticky Sorghum	Beijing, China	Sorghum Germplasm Resource Conservation Bank of Sorghum Research Institute of Shanxi Agricultural University
Early Red Kafir #866	U.S.A	Sorghum Germplasm Resource Conservation Bank of Sorghum Research Institute of Shanxi Agricultural University
Pearl White	Beijing, China	Sorghum Germplasm Resource Conservation Bank of Sorghum Research Institute of Shanxi Agricultural University
Sugar Sorghum3#	Japan	Sorghum Germplasm Resource Conservation Bank of Sorghum Research Institute of Shanxi Agricultural University
KS153-1	U.S.A	Sorghum Germplasm Resource Conservation Bank of Sorghum Research Institute of Shanxi Agricultural University
LR-226	U.S.A	Sorghum Germplasm Resource Conservation Bank of Sorghum Research Institute of Shanxi Agricultural University
Beiping No.7	Beijing, China	Sorghum Germplasm Resource Conservation Bank of Sorghum Research Institute of Shanxi Agricultural University
Black Amber # 7308	U.S.A	Sorghum Germplasm Resource Conservation Bank of Sorghum Research Institute of Shanxi Agricultural University
Combine Kafir 60-1	U.S.A	Sorghum Germplasm Resource Conservation Bank of Sorghum Research Institute of Shanxi Agricultural University
IS 4884C	India	Sorghum Germplasm Resource Conservation Bank of Sorghum Research Institute of Shanxi Agricultural University
A16023-1	India	Sorghum Germplasm Resource Conservation Bank of Sorghum Research Institute of Shanxi Agricultural University
ICSH 25	India	Sorghum Germplasm Resource Conservation Bank of Sorghum Research Institute of Shanxi Agricultural University
02-512	Shanxi, China	Sorghum Germplasm Resource Conservation Bank of Sorghum Research Institute of Shanxi Agricultural University
White Sticky Sorghum	Anhui, China	Sorghum Germplasm Resource Conservation Bank of Sorghum Research Institute of Shanxi Agricultural University
Mays Amber	Japan	Sorghum Germplasm Resource Conservation Bank of Sorghum Research Institute of Shanxi Agricultural University
Dali 105	Shanxi, China	Sorghum Germplasm Resource Conservation Bank of Sorghum Research Institute of Shanxi Agricultural University
Kaferita # 812	U.S.A	Sorghum Germplasm Resource Conservation Bank of Sorghum Research Institute of Shanxi Agricultural University
IS 8544	India	Sorghum Germplasm Resource Conservation Bank of Sorghum Research Institute of Shanxi Agricultural University
IS 22238	India	Sorghum Germplasm Resource Conservation Bank of Sorghum Research Institute of Shanxi Agricultural University
ICS16B	India	Sorghum Germplasm Resource Conservation Bank of Sorghum Research Institute of Shanxi Agricultural University
S.O.102	Japan	Sorghum Germplasm Resource Conservation Bank of Sorghum Research Institute of Shanxi Agricultural University
Fuji A	Japan	Sorghum Germplasm Resource Conservation Bank of Sorghum Research Institute of Shanxi Agricultural University
Qiye	Beijing, China	Sorghum Germplasm Resource Conservation Bank of Sorghum Research Institute of Shanxi Agricultural University
IS 10477	India	Sorghum Germplasm Resource Conservation Bank of Sorghum Research Institute of Shanxi Agricultural University
Jingyang Red Sorghum	Shaanxi, China	Sorghum Germplasm Resource Conservation Bank of Sorghum Research Institute of Shanxi Agricultural University
Sugar Sorghum(Sixian)	Anhui, China	Sorghum Germplasm Resource Conservation Bank of Sorghum Research Institute of Shanxi Agricultural University
PM 17413	India	Sorghum Germplasm Resource Conservation Bank of Sorghum Research Institute of Shanxi Agricultural University
Huangluoshan	Heilongjiang, China	Sorghum Germplasm Resource Conservation Bank of Sorghum Research Institute of Shanxi Agricultural University
Dwarf Sorghum	Hebei, China	Sorghum Germplasm Resource Conservation Bank of Sorghum Research Institute of Shanxi Agricultural University
Sticky Sorghum	Beijing, China	Sorghum Germplasm Resource Conservation Bank of Sorghum Research Institute of Shanxi Agricultural University
Bishon Kafir # 841	U.S.A	Sorghum Germplasm Resource Conservation Bank of Sorghum Research Institute of Shanxi Agricultural University
Pedicel Half Bone	Anhui, China	Sorghum Germplasm Resource Conservation Bank of Sorghum Research Institute of Shanxi Agricultural University
Red Sorghum	Heilongjiang, China	Sorghum Germplasm Resource Conservation Bank of Sorghum Research Institute of Shanxi Agricultural University
IS 2279C	India	Sorghum Germplasm Resource Conservation Bank of Sorghum Research Institute of Shanxi Agricultural University
Hegari # 750	U.S.A	Sorghum Germplasm Resource Conservation Bank of Sorghum Research Institute of Shanxi Agricultural University
ICSV 210	India	Sorghum Germplasm Resource Conservation Bank of Sorghum Research Institute of Shanxi Agricultural University
Broom Sorghum	Shanxi, China	Sorghum Germplasm Resource Conservation Bank of Sorghum Research Institute of Shanxi Agricultural University
IS 6440C	India	Sorghum Germplasm Resource Conservation Bank of Sorghum Research Institute of Shanxi Agricultural University
IS 955004	India	Sorghum Germplasm Resource Conservation Bank of Sorghum Research Institute of Shanxi Agricultural University
5-46796	India	Sorghum Germplasm Resource Conservation Bank of Sorghum Research Institute of Shanxi Agricultural University
Dwarf Sorghum	Yunnan, China	Sorghum Germplasm Resource Conservation Bank of Sorghum Research Institute of Shanxi Agricultural University
IS 339	India	Sorghum Germplasm Resource Conservation Bank of Sorghum Research Institute of Shanxi Agricultural University
ICSR 41	India	Sorghum Germplasm Resource Conservation Bank of Sorghum Research Institute of Shanxi Agricultural University
E35-1	India	Sorghum Germplasm Resource Conservation Bank of Sorghum Research Institute of Shanxi Agricultural University
Chuotuihan	Beijing, China	Sorghum Germplasm Resource Conservation Bank of Sorghum Research Institute of Shanxi Agricultural University
Bird Proof Kafer #662	U.S.A	Sorghum Germplasm Resource Conservation Bank of Sorghum Research Institute of Shanxi Agricultural University
Geta Sorghum	Shanxi, China	Sorghum Germplasm Resource Conservation Bank of Sorghum Research Institute of Shanxi Agricultural University
ICSV 197	India	Sorghum Germplasm Resource Conservation Bank of Sorghum Research Institute of Shanxi Agricultural University
77CS5388	Mexico	Sorghum Germplasm Resource Conservation Bank of Sorghum Research Institute of Shanxi Agricultural University
Early Kalo(Grain Sorghum)Kansas	U.S.A	Sorghum Germplasm Resource Conservation Bank of Sorghum Research Institute of Shanxi Agricultural University
M1010B	Shanxi, China	Sorghum Germplasm Resource Conservation Bank of Sorghum Research Institute of Shanxi Agricultural University
HC356/5346	Shanxi, China	Sorghum Germplasm Resource Conservation Bank of Sorghum Research Institute of Shanxi Agricultural University
Zhe43R	Neimenggu, China	Sorghum Germplasm Resource Conservation Bank of Sorghum Research Institute of Shanxi Agricultural University
Y-121(Waibohong)	Shanxi, China	Sorghum Germplasm Resource Conservation Bank of Sorghum Research Institute of Shanxi Agricultural University
XianmiSorghum	Anhui, China	Sorghum Germplasm Resource Conservation Bank of Sorghum Research Institute of Shanxi Agricultural University
88BP28	U.S.A	Sorghum Germplasm Resource Conservation Bank of Sorghum Research Institute of Shanxi Agricultural University
6B	U.S.A	Sorghum Germplasm Resource Conservation Bank of Sorghum Research Institute of Shanxi Agricultural University
Purdu9-15-30	U.S.A	Sorghum Germplasm Resource Conservation Bank of Sorghum Research Institute of Shanxi Agricultural University
P-10	U.S.A	Sorghum Germplasm Resource Conservation Bank of Sorghum Research Institute of Shanxi Agricultural University
N91R	U.S.A	Sorghum Germplasm Resource Conservation Bank of Sorghum Research Institute of Shanxi Agricultural University
MalisorB4-7	U.S.A	Sorghum Germplasm Resource Conservation Bank of Sorghum Research Institute of Shanxi Agricultural University
94M4108	U.S.A	Sorghum Germplasm Resource Conservation Bank of Sorghum Research Institute of Shanxi Agricultural University
90CCEDN343	U.S.A	Sorghum Germplasm Resource Conservation Bank of Sorghum Research Institute of Shanxi Agricultural University
Erchiban	Beijing, China	Sorghum Germplasm Resource Conservation Bank of Sorghum Research Institute of Shanxi Agricultural University
Ke137R	Heilongjiang, China	Sorghum Germplasm Resource Conservation Bank of Sorghum Research Institute of Shanxi Agricultural University
Ke127R	Heilongjiang, China	Sorghum Germplasm Resource Conservation Bank of Sorghum Research Institute of Shanxi Agricultural University
Beiping No.7	Beijing, China	Sorghum Germplasm Resource Conservation Bank of Sorghum Research Institute of Shanxi Agricultural University
Beiping No.3	Beijing, China	Sorghum Germplasm Resource Conservation Bank of Sorghum Research Institute of Shanxi Agricultural University
Sugar Sorghum(Susong)	Anhui, China	Sorghum Germplasm Resource Conservation Bank of Sorghum Research Institute of Shanxi Agricultural University
Fetarita # 182	U.S.A	Sorghum Germplasm Resource Conservation Bank of Sorghum Research Institute of Shanxi Agricultural University
Sugar Sorghum(Fanchang)	Anhui, China	Sorghum Germplasm Resource Conservation Bank of Sorghum Research Institute of Shanxi Agricultural University
Loose Panicle Red Hull Dwarf Sorghum	Jilin, China	Sorghum Germplasm Resource Conservation Bank of Sorghum Research Institute of Shanxi Agricultural University
Haidian Red Sorghum	Beijing, China	Sorghum Germplasm Resource Conservation Bank of Sorghum Research Institute of Shanxi Agricultural University
Grohoma # 920	U.S.A	Sorghum Germplasm Resource Conservation Bank of Sorghum Research Institute of Shanxi Agricultural University
Sweet Election 14(5006-3)	Beijing, China	Sorghum Germplasm Resource Conservation Bank of Sorghum Research Institute of Shanxi Agricultural University
East Of Shanhaiguan Sorghum	Liaoning, China	Sorghum Germplasm Resource Conservation Bank of Sorghum Research Institute of Shanxi Agricultural University
Pearl Umbrella	Liaoning, China	Sorghum Germplasm Resource Conservation Bank of Sorghum Research Institute of Shanxi Agricultural University
Waibozhang	Heilongjiang, China	Sorghum Germplasm Resource Conservation Bank of Sorghum Research Institute of Shanxi Agricultural University
Habaifenzhi	Heilongjiang, China	Sorghum Germplasm Resource Conservation Bank of Sorghum Research Institute of Shanxi Agricultural University
White Sorghum	Beijing, China	Sorghum Germplasm Resource Conservation Bank of Sorghum Research Institute of Shanxi Agricultural University
Peitouhong	Beijing, China	Sorghum Germplasm Resource Conservation Bank of Sorghum Research Institute of Shanxi Agricultural University
M-60839	India	Sorghum Germplasm Resource Conservation Bank of Sorghum Research Institute of Shanxi Agricultural University
B8B	India	Sorghum Germplasm Resource Conservation Bank of Sorghum Research Institute of Shanxi Agricultural University
A16023-2	India	Sorghum Germplasm Resource Conservation Bank of Sorghum Research Institute of Shanxi Agricultural University
L-402B	U.S.A	Sorghum Germplasm Resource Conservation Bank of Sorghum Research Institute of Shanxi Agricultural University
ICSB 102	India	Sorghum Germplasm Resource Conservation Bank of Sorghum Research Institute of Shanxi Agricultural University
ICSB 88	India	Sorghum Germplasm Resource Conservation Bank of Sorghum Research Institute of Shanxi Agricultural University
ICSB 70	India	Sorghum Germplasm Resource Conservation Bank of Sorghum Research Institute of Shanxi Agricultural University
Lishihuang	Shanxi, China	Sorghum Germplasm Resource Conservation Bank of Sorghum Research Institute of Shanxi Agricultural University
IS 1134C	India	Sorghum Germplasm Resource Conservation Bank of Sorghum Research Institute of Shanxi Agricultural University
Red Hull Sorghum	Shanxi, China	Sorghum Germplasm Resource Conservation Bank of Sorghum Research Institute of Shanxi Agricultural University
ICSH 16	India	Sorghum Germplasm Resource Conservation Bank of Sorghum Research Institute of Shanxi Agricultural University
ICSR88004	India	Sorghum Germplasm Resource Conservation Bank of Sorghum Research Institute of Shanxi Agricultural University
ICSR 145	India	Sorghum Germplasm Resource Conservation Bank of Sorghum Research Institute of Shanxi Agricultural University
ICSR 29	India	Sorghum Germplasm Resource Conservation Bank of Sorghum Research Institute of Shanxi Agricultural University
GR108-90M24	U.S.A	Sorghum Germplasm Resource Conservation Bank of Sorghum Research Institute of Shanxi Agricultural University
IS 1139C	India	Sorghum Germplasm Resource Conservation Bank of Sorghum Research Institute of Shanxi Agricultural University
Bwheelland-1	U.S.A	Sorghum Germplasm Resource Conservation Bank of Sorghum Research Institute of Shanxi Agricultural University
Bwheelland-2	U.S.A	Sorghum Germplasm Resource Conservation Bank of Sorghum Research Institute of Shanxi Agricultural University
1131B	U.S.A	Sorghum Germplasm Resource Conservation Bank of Sorghum Research Institute of Shanxi Agricultural University
ICSV 202	India	Sorghum Germplasm Resource Conservation Bank of Sorghum Research Institute of Shanxi Agricultural University
MR 933	India	Sorghum Germplasm Resource Conservation Bank of Sorghum Research Institute of Shanxi Agricultural University
IS 7534C	India	Sorghum Germplasm Resource Conservation Bank of Sorghum Research Institute of Shanxi Agricultural University
IS 7506C	India	Sorghum Germplasm Resource Conservation Bank of Sorghum Research Institute of Shanxi Agricultural University
IS 7502C	India	Sorghum Germplasm Resource Conservation Bank of Sorghum Research Institute of Shanxi Agricultural University
PM 17681	India	Sorghum Germplasm Resource Conservation Bank of Sorghum Research Institute of Shanxi Agricultural University
PM 12707	India	Sorghum Germplasm Resource Conservation Bank of Sorghum Research Institute of Shanxi Agricultural University
PM 12653	India	Sorghum Germplasm Resource Conservation Bank of Sorghum Research Institute of Shanxi Agricultural University
Broomcorn Sorghum	India	Sorghum Germplasm Resource Conservation Bank of Sorghum Research Institute of Shanxi Agricultural University
IS 18483	India	Sorghum Germplasm Resource Conservation Bank of Sorghum Research Institute of Shanxi Agricultural University
19504	India	Sorghum Germplasm Resource Conservation Bank of Sorghum Research Institute of Shanxi Agricultural University
SPL 23R	India	Sorghum Germplasm Resource Conservation Bank of Sorghum Research Institute of Shanxi Agricultural University
PS 28020-2	India	Sorghum Germplasm Resource Conservation Bank of Sorghum Research Institute of Shanxi Agricultural University
M 55799	India	Sorghum Germplasm Resource Conservation Bank of Sorghum Research Institute of Shanxi Agricultural University
MB 926	India	Sorghum Germplasm Resource Conservation Bank of Sorghum Research Institute of Shanxi Agricultural University
MB 906	India	Sorghum Germplasm Resource Conservation Bank of Sorghum Research Institute of Shanxi Agricultural University
IS-24999	India	Sorghum Germplasm Resource Conservation Bank of Sorghum Research Institute of Shanxi Agricultural University
19518	India	Sorghum Germplasm Resource Conservation Bank of Sorghum Research Institute of Shanxi Agricultural University
IS 1335C-1	India	Sorghum Germplasm Resource Conservation Bank of Sorghum Research Institute of Shanxi Agricultural University
5-46394	India	Sorghum Germplasm Resource Conservation Bank of Sorghum Research Institute of Shanxi Agricultural University
DORADO	U.S.A	Sorghum Germplasm Resource Conservation Bank of Sorghum Research Institute of Shanxi Agricultural University
IS 16046	India	Sorghum Germplasm Resource Conservation Bank of Sorghum Research Institute of Shanxi Agricultural University
IS 2177C	India	Sorghum Germplasm Resource Conservation Bank of Sorghum Research Institute of Shanxi Agricultural University
Third Generation Sorghum	Beijing, China	Sorghum Germplasm Resource Conservation Bank of Sorghum Research Institute of Shanxi Agricultural University
Nankou Sorghum	Beijing, China	Sorghum Germplasm Resource Conservation Bank of Sorghum Research Institute of Shanxi Agricultural University
Bai Wudalang	Hebei, China	Sorghum Germplasm Resource Conservation Bank of Sorghum Research Institute of Shanxi Agricultural University
White Sorghum	Hebei, China	Sorghum Germplasm Resource Conservation Bank of Sorghum Research Institute of Shanxi Agricultural University
Heniyan	Hebei, China	Sorghum Germplasm Resource Conservation Bank of Sorghum Research Institute of Shanxi Agricultural University
Leoti	U.S.A	Sorghum Germplasm Resource Conservation Bank of Sorghum Research Institute of Shanxi Agricultural University
IS 2508C	India	Sorghum Germplasm Resource Conservation Bank of Sorghum Research Institute of Shanxi Agricultural University
IS 3477C-2	India	Sorghum Germplasm Resource Conservation Bank of Sorghum Research Institute of Shanxi Agricultural University
IS 3911C	India	Sorghum Germplasm Resource Conservation Bank of Sorghum Research Institute of Shanxi Agricultural University
IS 3071C	India	Sorghum Germplasm Resource Conservation Bank of Sorghum Research Institute of Shanxi Agricultural University
IS 4639C	India	Sorghum Germplasm Resource Conservation Bank of Sorghum Research Institute of Shanxi Agricultural University
IS 5554C	India	Sorghum Germplasm Resource Conservation Bank of Sorghum Research Institute of Shanxi Agricultural University
IS 5769C	India	Sorghum Germplasm Resource Conservation Bank of Sorghum Research Institute of Shanxi Agricultural University
IS 5892C	India	Sorghum Germplasm Resource Conservation Bank of Sorghum Research Institute of Shanxi Agricultural University
IS 8070	India	Sorghum Germplasm Resource Conservation Bank of Sorghum Research Institute of Shanxi Agricultural University
IS 2662C	India	Sorghum Germplasm Resource Conservation Bank of Sorghum Research Institute of Shanxi Agricultural University
IS-6882C	India	Sorghum Germplasm Resource Conservation Bank of Sorghum Research Institute of Shanxi Agricultural University
IS-24989	India	Sorghum Germplasm Resource Conservation Bank of Sorghum Research Institute of Shanxi Agricultural University
IS-7254C	India	Sorghum Germplasm Resource Conservation Bank of Sorghum Research Institute of Shanxi Agricultural University
Banas Durra	India	Sorghum Germplasm Resource Conservation Bank of Sorghum Research Institute of Shanxi Agricultural University
Atalas #899	U.S.A	Sorghum Germplasm Resource Conservation Bank of Sorghum Research Institute of Shanxi Agricultural University
IS 2825	India	Sorghum Germplasm Resource Conservation Bank of Sorghum Research Institute of Shanxi Agricultural University
ICSB 59	India	Sorghum Germplasm Resource Conservation Bank of Sorghum Research Institute of Shanxi Agricultural University
ICSB 50	India	Sorghum Germplasm Resource Conservation Bank of Sorghum Research Institute of Shanxi Agricultural University
Early Wheatland B	Japan	Sorghum Germplasm Resource Conservation Bank of Sorghum Research Institute of Shanxi Agricultural University
Early Hegarl	Japan	Sorghum Germplasm Resource Conservation Bank of Sorghum Research Institute of Shanxi Agricultural University
Early Kalo	Japan	Sorghum Germplasm Resource Conservation Bank of Sorghum Research Institute of Shanxi Agricultural University
Hegarl	Japan	Sorghum Germplasm Resource Conservation Bank of Sorghum Research Institute of Shanxi Agricultural University
Indian Amber	India	Sorghum Germplasm Resource Conservation Bank of Sorghum Research Institute of Shanxi Agricultural University
Dawn Kafir-1	U.S.A	Sorghum Germplasm Resource Conservation Bank of Sorghum Research Institute of Shanxi Agricultural University
Dawn Kafir-2	U.S.A	Sorghum Germplasm Resource Conservation Bank of Sorghum Research Institute of Shanxi Agricultural University
White Martin	Japan	Sorghum Germplasm Resource Conservation Bank of Sorghum Research Institute of Shanxi Agricultural University
Mocktak	Japan	Sorghum Germplasm Resource Conservation Bank of Sorghum Research Institute of Shanxi Agricultural University
Darso Ok #1	U.S.A	Sorghum Germplasm Resource Conservation Bank of Sorghum Research Institute of Shanxi Agricultural University
Moctac Local	Japan	Sorghum Germplasm Resource Conservation Bank of Sorghum Research Institute of Shanxi Agricultural University
Suda×ST11	Japan	Sorghum Germplasm Resource Conservation Bank of Sorghum Research Institute of Shanxi Agricultural University
14-T438-2	Russia	Sorghum Germplasm Resource Conservation Bank of Sorghum Research Institute of Shanxi Agricultural University
14-T456-1	Russia	Sorghum Germplasm Resource Conservation Bank of Sorghum Research Institute of Shanxi Agricultural University
14-T458-2	Russia	Sorghum Germplasm Resource Conservation Bank of Sorghum Research Institute of Shanxi Agricultural University
14-T529	Russia	Sorghum Germplasm Resource Conservation Bank of Sorghum Research Institute of Shanxi Agricultural University
14-T532	Russia	Sorghum Germplasm Resource Conservation Bank of Sorghum Research Institute of Shanxi Agricultural University
14-T545	Russia	Sorghum Germplasm Resource Conservation Bank of Sorghum Research Institute of Shanxi Agricultural University
Sanchisan	Shanxi, China	Sorghum Germplasm Resource Conservation Bank of Sorghum Research Institute of Shanxi Agricultural University
Tx623B	U.S.A	Sorghum Germplasm Resource Conservation Bank of Sorghum Research Institute of Shanxi Agricultural University
V4B	Shanxi, China	Sorghum Germplasm Resource Conservation Bank of Sorghum Research Institute of Shanxi Agricultural University
Purple Hull Sorghum	Anhui, China	Sorghum Germplasm Resource Conservation Bank of Sorghum Research Institute of Shanxi Agricultural University
Taerhuang	Beijing, China	Sorghum Germplasm Resource Conservation Bank of Sorghum Research Institute of Shanxi Agricultural University
Combine Kafir 60-2	U.S.A	Sorghum Germplasm Resource Conservation Bank of Sorghum Research Institute of Shanxi Agricultural University
Black Hull-1	Henan, China	Sorghum Germplasm Resource Conservation Bank of Sorghum Research Institute of Shanxi Agricultural University
Black Hull-2	Henan, China	Sorghum Germplasm Resource Conservation Bank of Sorghum Research Institute of Shanxi Agricultural University
741324 White	Shanxi, China	Sorghum Germplasm Resource Conservation Bank of Sorghum Research Institute of Shanxi Agricultural University
CSZ90	Jiangsu, China	Jiangsu Academy of Agricultural Sciences
CSZ59	Jiangsu, China	Jiangsu Academy of Agricultural Sciences
CSZ92	Jiangsu, China	Jiangsu Academy of Agricultural Sciences
CSZ64	Jiangsu, China	Jiangsu Academy of Agricultural Sciences
CSZ53	Jiangsu, China	Jiangsu Academy of Agricultural Sciences
CSZ66	Jiangsu, China	Jiangsu Academy of Agricultural Sciences
CSZ54	Jiangsu, China	Jiangsu Academy of Agricultural Sciences
CSZ41	Jiangsu, China	Jiangsu Academy of Agricultural Sciences
CSZ7	Jiangsu, China	Jiangsu Academy of Agricultural Sciences
CSZ57	Jiangsu, China	Jiangsu Academy of Agricultural Sciences
CSZ1	Jiangsu, China	Jiangsu Academy of Agricultural Sciences
CSZ13	Jiangsu, China	Jiangsu Academy of Agricultural Sciences
CSZ32	Jiangsu, China	Jiangsu Academy of Agricultural Sciences
CSZ19	Jiangsu, China	Jiangsu Academy of Agricultural Sciences
CSZ9	Jiangsu, China	Jiangsu Academy of Agricultural Sciences
CSZ60	Jiangsu, China	Jiangsu Academy of Agricultural Sciences
CSZ61	Jiangsu, China	Jiangsu Academy of Agricultural Sciences
CSz15	Jiangsu, China	Jiangsu Academy of Agricultural Sciences
CSZ3	Jiangsu, China	Jiangsu Academy of Agricultural Sciences
CSZ30	Jiangsu, China	Jiangsu Academy of Agricultural Sciences
CSZ31	Jiangsu, China	Jiangsu Academy of Agricultural Sciences
CSZ33	Jiangsu, China	Jiangsu Academy of Agricultural Sciences
CSZ36	Jiangsu, China	Jiangsu Academy of Agricultural Sciences
CSZ37	Jiangsu, China	Jiangsu Academy of Agricultural Sciences
CSZ39	Jiangsu, China	Jiangsu Academy of Agricultural Sciences
CSZ40	Jiangsu, China	Jiangsu Academy of Agricultural Sciences
CSZ58	Jiangsu, China	Jiangsu Academy of Agricultural Sciences
CSZ70	Jiangsu, China	Jiangsu Academy of Agricultural Sciences
