# Supplementary material for: The Identification of a Yield-Related Gene Controlling Multiple Traits Using GWAS in Sorghum (Sorghum bicolor L.)
Source: Plants (Basel). 2023 Apr 4;12(7):1557. doi: 10.3390/plants12071557 (PMC10097259; doi:10.3390/plants12071557)
Supplement: Supplementary file 1 [file plants-12-01557-s001.zip › Table S2.xlsx]

## Sheet: Table S2
Table S2. The SNP number of chromosome.
Chromosome	Number of SNP
NC_012870	319615
NC_012871	327237
NC_012872	277033
NC_012873	298354
NC_012874	312004
NC_012875	287370
NC_012876	224286
NC_012877	239527
NC_012878	237037
NC_012879	288553
All	2811016
