# Supplementary material for: The Identification of a Yield-Related Gene Controlling Multiple Traits Using GWAS in Sorghum (Sorghum bicolor L.)
Source: Plants (Basel). 2023 Apr 4;12(7):1557. doi: 10.3390/plants12071557 (PMC10097259; doi:10.3390/plants12071557)
Supplement: Supplementary file 1 [file plants-12-01557-s001.zip › Table S3.xlsx]

## Sheet: Table S3
Table S3 The result of PCA.
Variety name	PC1	PC2	PC3	PC4	PC5	PC6	PC7	PC8	PC9	PC10
Saccaline	-0.0153	-0.0729	0.0237	0.0523	-0.0165	-0.0113	0.0076	0.1184	-0.0947	-0.0419
Double Grain Sorghum	-0.088	0.0172	-0.0161	0.0177	0.0313	-0.0265	-0.0344	0.0114	0.0098	-0.0058
Dval	0.0134	-0.1058	-0.0012	0.0754	-0.029	-0.0524	-0.012	-0.0143	-0.0357	0.0009
Black Hull Sorghum	-0.0863	0.0176	-0.0135	0.0155	0.0197	-0.0197	-0.0281	0.0101	0.0027	-0.0041
IS 1159C	0.0429	-0.0331	0.0032	-0.1352	0.0265	0.0638	-0.0418	0.0077	0.054	-0.1574
Sugar Sorghum(Chaoxian)	-0.0845	0.0147	-0.0101	0.0223	0.0155	-0.0024	0.0179	-0.0109	0.0042	-0.0018
Sugar Sorghum	-0.0838	0.0143	-0.011	0.0231	0.0107	0.0135	0.0421	-0.0238	0.0129	-0.0043
Early Hegari SA #281	0.0706	0.119	0.2428	0.0743	0.0293	0.0097	-0.0937	-0.062	-0.0159	0.0524
Cock Feterita	0.0465	-0.0232	0.0883	-0.0999	0.0722	-0.1163	0.1648	0.2086	0.1184	-0.0073
Yellow Sticky Sorghum	-0.0874	0.0164	-0.0151	0.0186	0.028	-0.024	-0.0385	0.0148	0.0011	-0.0056
Pearl White	0.0591	-0.0315	0.0234	-0.0679	0.0618	0.0104	-0.0286	-0.0348	-0.0164	-0.227
Sugar Sorghum3#	-0.0887	0.0184	-0.0159	0.0168	0.0299	-0.0247	-0.0421	0.0124	0.0104	-0.005
KS153-1	0.0503	-0.1071	-0.004	0.0337	0.0214	0.0728	-0.0597	0.1218	-0.1144	-0.1301
LR-226	0.0662	0.0393	-0.0958	-0.0773	0.0335	0.1081	-0.0145	0.0363	0.032	0.1378
Beiping No.7	-0.0022	-0.0387	-0.0441	-0.011	0.0195	-0.0478	-0.0285	-0.026	0.0295	-0.0113
Black Amber # 7308	0.0596	-0.0322	0.0194	-0.1065	0.0378	-0.0817	-0.0182	-0.148	0.0408	-0.0862
IS 4884C	0.0908	0.1006	-0.0922	0.0712	-0.0737	-0.1532	0.0707	-0.043	-0.0539	0.025
A16023-1	0.0738	0.0907	-0.1347	-0.0441	-0.0053	0.1221	-0.0622	-0.0494	0.0645	0.2039
02-512	0.0692	0.094	0.0481	-0.0127	0.0209	-0.0609	0.0791	0.0725	-0.0149	-0.107
Mays Amber	0.0712	0.022	-0.0016	0.0389	0.0033	-0.0424	0.0797	0.0885	-0.1158	-0.0538
Dali 105	-0.0854	0.0153	-0.0138	0.0177	0.0235	-0.021	-0.0295	0.0137	0.0049	-0.0065
Kaferita # 812	0.037	0.0199	0.0853	-0.1435	0.0772	-0.1201	0.139	0.1864	0.1962	0.0157
IS 22238	-0.0533	-0.0078	0.0508	0.0443	-0.1021	0.194	0.2484	-0.134	0.1055	-0.0346
ICS16B	-0.0786	0.01	-0.0014	0.0184	-0.0125	0.0431	0.1057	-0.0531	-0.0037	-0.0107
S.O.102	-0.0818	0.0171	-0.01	0.0027	0.0027	-0.0064	-0.0073	0.0015	0.0038	-0.0121
Fuji A	-0.0848	0.0146	-0.0121	0.0168	0.0215	-0.0127	-0.0136	0.0068	-0.008	-0.0013
Qiye	-0.0816	0.0157	-0.0083	0.0119	0.0032	0.0044	0.0218	-0.0125	-0.0054	-0.006
IS 10477	-0.0531	-0.0078	0.0507	0.0442	-0.102	0.194	0.2479	-0.1337	0.1054	-0.0345
Jingyang Red Sorghum	-0.0841	0.0155	-0.0116	0.0166	0.0164	-0.0091	-0.0053	0.0031	-0.0052	-0.002
Sugar Sorghum(Sixian)	-0.0793	0.0111	-0.0028	0.0174	-0.0056	0.0329	0.0826	-0.0402	-0.0053	-0.0037
PM 17413	-0.0834	0.0161	-0.0114	0.009	0.0064	-0.0074	-0.0097	-0.0017	0.0022	-0.0137
Huangluoshan	0.0608	-0.1425	0.024	0.1011	-0.0424	0.0319	0.0152	-0.0605	-0.0017	-0.0488
Dwarf Sorghum	-0.0533	-0.0078	0.0508	0.0443	-0.1023	0.1942	0.2486	-0.1341	0.1056	-0.0346
Sticky Sorghum	0.0615	0.0975	-0.0468	0.0135	-0.0261	0.0045	0.0702	0.1182	-0.0184	-0.0157
Pedicel Half Bone	0.0889	0.0996	-0.1265	-0.029	-0.0044	0.0636	-0.0447	-0.0341	0.0853	-0.004
Red Sorghum	-0.0793	0.0142	-0.0084	0.0054	0.0116	-0.0079	-0.0095	0.0098	-0.0106	-0.0014
IS 2279C	-0.0874	0.0172	-0.0157	0.0157	0.0302	-0.0266	-0.0414	0.0109	0.0116	-0.003
Hegari # 750	0.074	-0.0605	-0.0322	0.0587	0.0235	0.1888	-0.0905	0.1078	0.077	-0.0267
Broom Sorghum	0.0616	0.1073	0.2338	0.0645	-0.0052	0.0183	-0.1036	-0.0556	-0.0341	0.0498
IS 955004	-0.0857	0.0143	-0.0127	0.018	0.0198	-0.0133	-0.0126	0.0076	-0.0022	-0.0026
5-46796	0.0496	-0.1332	-0.0326	0.0276	0.0222	-0.0269	-0.0716	-0.0139	-0.0119	0.0606
Dwarf Sorghum	0.0797	0.007	-0.0906	0.0095	0.0181	0.1187	-0.0674	0.0804	0.0131	-0.0835
IS 339	0.0505	-0.1217	0.029	0.0296	0.0504	0.1388	-0.0078	0.092	-0.0823	0.0236
Chuotuihan	0.0618	-0.019	0.034	0.0154	-0.0078	0.0685	0.0687	0.1962	0.171	0.104
Bird Proof Kafer #662	-0.0725	0.0162	-0.0066	0.0035	0.0141	0.0147	0.032	-0.0023	-0.0297	0.0234
ICSV 197	-0.0877	0.0171	-0.015	0.0207	0.0249	-0.0204	-0.0257	0.0069	0.004	-0.0045
CSZ90	-0.0841	0.0147	-0.0105	0.022	0.0167	-0.0036	0.015	-0.0084	0.0037	-0.0012
CSZ59	-0.083	0.0153	-0.0098	0.012	0.0138	-0.0116	-0.0227	0.0056	-0.0011	-0.0017
CSZ92	-0.0855	0.0169	-0.0149	0.014	0.0243	-0.022	-0.0357	0.0182	0.0086	-0.003
CSZ53	-0.0867	0.0162	-0.0148	0.0159	0.0279	-0.0247	-0.0334	0.0173	0.0115	-0.0057
CSZ66	-0.0868	0.017	-0.0159	0.0145	0.0272	-0.0251	-0.0386	0.0165	0.0086	-0.0065
CSZ54	0.0704	-0.0434	-0.052	-0.122	0.053	0.0573	-0.0348	0.0751	0.1557	-0.0505
CSZ41	0.0582	-0.1129	-0.0048	0.0701	0.0173	0.1795	-0.0894	0.1037	0.0712	-0.0562
CSZ7	-0.0244	-0.0115	-0.0218	-0.044	0.0838	0.0168	-0.0459	-0.0419	0.0221	0.0169
CSZ57	0.0309	-0.0386	0.0156	-0.1012	0.017	-0.0057	0.0521	0.0909	0.0256	-0.1312
CSZ1	-0.0867	0.0166	-0.0158	0.0183	0.0262	-0.0234	-0.0328	0.0139	0.0065	-0.0041
CSZ13	0.0742	0.0045	0.041	0.0992	-0.0164	0.0301	0.0533	0.1256	-0.0509	-0.0662
CSZ19	0.0845	-0.014	-0.0025	-0.0959	0.0691	-0.1922	0.0876	-0.1855	0.0741	-0.0692
CSZ9	0.0784	0.0793	-0.1305	-0.0474	0.0055	0.099	-0.0415	-0.039	0.0761	0.0305
CSZ60	0.0592	-0.1372	-0.0315	0.0236	0.0259	0.0237	-0.0768	0.0172	0.0181	0.0367
CSZ61	0.0896	0.1345	-0.0899	0.0572	-0.0471	-0.0348	0.0971	0.1198	-0.1071	-0.0203
Tx3197B	0.0697	0.0653	-0.0768	-0.0067	0.0174	0.0681	-0.0123	-0.0402	-0.0542	-0.0674
CSZ64	-0.0247	-0.006	0.0135	-0.0876	0.0294	0.075	0.0694	0.055	-0.2068	0.1812
IS 8544	0.0384	-0.019	0.0095	-0.1571	0.0385	0.072	-0.0108	0.0046	0.0384	-0.0566
ICSV 210	-0.088	0.0169	-0.015	0.0184	0.0279	-0.0231	-0.0357	0.0143	0.0063	-0.0012
CSZ32	0.0774	-0.0137	-0.1026	0.027	-0.0262	-0.0378	-0.0807	-0.1206	0.1083	-0.0036
Early Red Kafir #866	0.0763	0.1261	-0.1082	0.0515	-0.0583	-0.0029	0.0532	0.0985	-0.0009	0.0334
Bishon Kafir # 841	-0.0183	-0.0209	0.0559	-0.1355	-0.3039	-0.0295	-0.0969	0.0323	0.0026	-0.0137
ICSH 25	-0.0647	0.0023	0.0176	0.006	-0.0907	0.1014	0.1676	-0.0955	0.0404	-0.0404
IS 6440C	0.0844	-0.014	-0.0026	-0.0956	0.0691	-0.1916	0.0873	-0.1851	0.0738	-0.0691
Combine Kafir 60-1	0.0921	0.1088	-0.1034	0.0927	-0.0765	-0.1552	0.0705	-0.0438	-0.044	0.0428
White Sticky Sorghum	0.091	-0.0062	-0.1294	0.0141	-0.0132	-0.0269	-0.0563	-0.05	0.0804	0.0005
Geta Sorghum	0.0845	0.1321	-0.0595	0.067	-0.0469	-0.0247	0.0535	0.0703	-0.087	-0.02
IS 9308	0.0803	0.1096	-0.0483	0.0661	-0.0266	-0.0268	0.0904	0.128	-0.1438	-0.0746
77CS5388	0.096	0.0675	-0.1336	0.0279	-0.0503	-0.0711	-0.0261	-0.1467	-0.004	0.0361
ICSR 41	-0.078	0.0075	-0.0072	0.0242	0.0008	0.0049	0.0256	-0.0139	0.0071	-0.0039
Jinliang No.5	0.0715	0.1278	-0.0701	0.0392	-0.0333	0.0252	0.0311	0.0926	-0.0199	-0.0027
E35-1	0.0485	0.0541	0.0973	-0.0085	-0.0015	0.007	0.0627	0.07	0.1002	-0.0305
CSZ31	-0.0858	0.0153	-0.0145	0.015	0.028	-0.0239	-0.0371	0.0163	0.0071	-0.004
IS 1139C	-0.0869	0.0172	-0.0161	0.0189	0.0293	-0.0255	-0.0403	0.0171	0.0085	-0.0034
IS 2177C	-0.0863	0.0154	-0.0156	0.0194	0.0264	-0.0225	-0.0351	0.015	0.0026	-0.0014
IS 3477C-2	-0.0875	0.0162	-0.0155	0.0197	0.0274	-0.0218	-0.032	0.0122	0.0065	-0.0021
IS 4639C	-0.0139	-0.0527	0.0418	0.0347	-0.0353	0.0023	0.1382	-0.0133	-0.0493	0.0263
IS 5769C	0.0588	0.0416	0.0253	-0.0832	0.0683	0.0529	-0.0207	-0.0445	0.0533	-0.0474
IS 8070	-0.0851	0.0151	-0.0134	0.0166	0.0243	-0.0222	-0.0332	0.0171	0.0097	-0.0078
IS 2825	-0.0176	-0.0047	0.0609	-0.1654	-0.3136	-0.0458	-0.0766	0.0068	-0.0381	-0.003
Early Wheatland B	0.043	-0.0571	-0.0136	-0.0304	0.0194	0.0429	0.0128	-0.0138	-0.176	-0.1342
Dawn Kafir-1	-0.0855	0.0161	-0.0162	0.0165	0.0254	-0.0235	-0.0338	0.013	0.0093	-0.0058
14-T458-2	0.0826	-0.1258	-0.0107	0.1219	-0.0107	0.0228	-0.0443	0.013	-0.018	0.0139
Black Hull-1	-0.0839	0.0139	-0.0075	0.0233	0.0035	0.0106	0.0471	-0.0304	0.0104	-0.0068
M1010B	0.0475	-0.093	0.0242	-0.0463	-0.0243	0.1212	-0.0382	0.032	0.0101	0.0796
Zhe43R	-0.0803	0.0149	-0.0093	0.0122	0.0178	-0.0101	-0.0156	0.0088	-0.0127	0.0041
88BP28	-0.0243	0.0198	-0.0213	-0.0166	0.059	0.046	-0.1204	-0.0723	0.0154	-0.0361
Ke127R	0.0676	0.0907	0.2121	0.0464	0.0502	0.0021	-0.0546	-0.0047	0.0688	0.0321
Haidian Red Sorghum	0.0721	-0.0129	-0.0782	0.0322	0.0024	0.0898	-0.0298	0.0996	-0.0395	-0.098
Sweet Election 14(5006-3)	0.0579	-0.0912	-0.005	-0.0001	0.033	0.1454	-0.05	0.0511	0.0556	0.0598
M-60839	0.0653	0.0171	0.0343	-0.1557	0.0871	-0.0551	0.0651	-0.0913	0.0258	-0.1609
A16023-2	0.0742	0.0908	-0.135	-0.0453	-0.0055	0.1234	-0.0636	-0.0514	0.0664	0.2054
ICSB 102	0.0515	-0.0764	0.0146	0.0413	-0.0094	-0.1153	0.0125	0.1411	0.1241	0.1008
ICSB 70	0.0867	0.1234	-0.013	0.0454	-0.0081	-0.0334	0.0465	0.0572	-0.0624	-0.0583
Red Hull Sorghum	0.0825	0.1119	-0.1487	-0.0085	-0.0226	0.088	-0.0369	-0.0101	0.0399	0.0203
ICSH 16	0.0009	-0.0177	0.0495	-0.1635	0.0372	-0.0245	0.1016	0.0644	-0.109	0.1346
GR108-90M24	-0.0266	-0.0057	0.0649	-0.1475	-0.3112	-0.0183	-0.0968	0.017	-0.0391	-0.0042
Bwheelland-1	0.0799	0.1294	0.238	0.0735	0.0501	0.009	-0.0963	-0.0601	-0.0148	0.0329
IS 7502C	-0.0848	0.0155	-0.0191	0.0155	0.0267	-0.0215	-0.048	0.0183	0.0155	0.001
PM 12653	0.0881	-0.0116	-0.0421	0.0211	0.0149	-0.1018	0.0075	-0.1174	-0.0635	-0.0983
19504	-0.0861	0.0176	-0.0124	0.0171	0.0253	-0.0227	-0.0333	0.0118	0.0094	-0.005
IS-24999	-0.087	0.0171	-0.0151	0.018	0.0266	-0.022	-0.0333	0.0132	0.0056	-0.0044
5-46394	-0.0258	-0.0121	0.069	-0.1602	-0.3107	-0.0318	-0.0815	0.0137	-0.0269	-0.0137
Third Generation Sorghum	-0.0859	0.0157	-0.0146	0.0163	0.0243	-0.02	-0.0306	0.0142	0.0002	-0.0035
CSZ3	0.0082	-0.0166	0.0377	0.0406	-0.0239	-0.145	-0.0607	-0.0405	-0.0629	-0.0363
CSz15	0.006	-0.0978	0.0162	0.0803	-0.0504	-0.1091	0.105	-0.0885	-0.0458	0.0967
CSZ30	0.0391	-0.0173	0.0101	-0.0996	0.0203	0.0944	-0.0764	-0.0286	0.0255	-0.1184
CSZ33	0.0341	-0.1388	0.0473	0.1587	-0.0688	-0.0333	0.0765	-0.0415	0.0024	0.05
CSZ36	0.0595	-0.1315	0.0083	-0.0848	0.0806	-0.1811	0.082	-0.1028	-0.0523	0.0893
CSZ37	-0.0683	0.0231	-0.0099	0.01	0.0337	0.0154	-0.0275	-0.003	0.0108	0.0447
CSZ39	-0.0245	-0.0068	0.0277	-0.0638	-0.0738	-0.0047	-0.0206	0.0627	0.0557	-0.0177
CSZ40	0.0603	0.0556	-0.0396	-0.0494	-0.0259	0.0122	-0.0182	0.1426	0.17	0.0598
CSZ58	-0.0875	0.0164	-0.0146	0.0199	0.0276	-0.0235	-0.0357	0.0124	0.0065	-0.0035
CSZ70	0.0077	-0.0888	0.0184	0.0904	-0.0297	0.0225	0.0503	-0.1093	0.0165	-0.0042
IS-24989	-0.027	-0.0057	0.0674	-0.1564	-0.3202	-0.0197	-0.1027	0.0152	-0.0413	-0.0057
White Martin	0.0406	-0.1458	0.0453	0.1493	-0.0651	-0.0479	0.0582	0.0068	-0.0238	0.0419
Mocktak	0.043	-0.1357	-0.0095	-0.061	0.0224	-0.1024	-0.0189	-0.0365	0.0618	0.0184
Sanchisan	0.0597	-0.1318	0.0088	-0.0852	0.0809	-0.1818	0.0826	-0.1031	-0.052	0.0903
Tx623B	-0.0065	0.0189	0.06	-0.0912	0.066	-0.1077	0.0723	0.1713	0.1579	-0.0304
Combine Kafir 60-2	0.0365	-0.0973	0.0162	0.0483	-0.042	-0.109	-0.0177	0.1166	0.0876	0.0769
XianmiSorghum	-0.0352	-0.0089	0.0393	-0.1289	0.0661	-0.1036	0.0179	0.0203	0.0605	0.0249
P-10	0.0704	0.0482	0.0414	-0.047	0.054	0.0319	-0.0272	-0.1033	-0.0502	-0.1544
MalisorB4-7	0.0457	-0.0422	-0.0159	-0.0849	0.0313	0.0482	0.0236	-0.0545	-0.1599	-0.0347
94M4108	0.0732	0.0606	-0.0067	-0.0276	0.0452	0.0229	0.0043	-0.0121	-0.0955	-0.1394
Ke137R	0.0466	0.0555	0.0736	-0.0891	0.034	-0.0664	0.083	0.0658	0.1742	-0.0667
Beiping No.3	-0.0135	-0.0366	-0.0086	-0.0918	0.0501	0.0779	-0.0124	0.0089	-0.2022	0.0454
Sugar Sorghum(Fanchang)	0.0227	-0.0483	-0.003	-0.0997	0.0229	0.0353	-0.0496	-0.0368	-0.0586	-0.1038
Loose Panicle Red Hull Dwarf Sorghum	0.0541	-0.0874	0.0731	-0.1258	0.1042	-0.0002	0.1098	-0.0558	0.007	0.1015
Waibozhang	0.047	-0.1477	0.0362	0.1555	-0.0538	-0.0206	0.0108	0.0549	-0.0054	0.0312
White Sorghum	0.0793	-0.0905	-0.0703	-0.0419	0.0109	-0.0813	-0.0303	-0.0599	0.0616	-0.0185
Peitouhong	0.0278	-0.0006	0.0932	0.011	0.043	0.0154	0.1075	0.1486	0.1714	0.081
B8B	-0.0012	-0.0772	-0.0104	0.0431	-0.0099	-0.0202	-0.0103	-0.0261	-0.0449	-0.0252
L-402B	0.0504	-0.1076	-0.0038	0.0341	0.0214	0.0733	-0.0604	0.1223	-0.1147	-0.1301
ICSB 88	0.0434	-0.0606	0.0415	-0.0331	0.0159	-0.1185	0.1092	-0.016	-0.0645	0.2375
Lishihuang	-0.0019	-0.077	-0.0052	0.0965	-0.0229	0.0309	0.0185	-0.1649	0.0616	0.0327
ICSR88004	-0.0058	-0.0927	-0.0466	0.0603	0.0143	-0.0419	-0.1272	-0.0701	0.0423	-0.0193
ICSR 145	-0.0856	0.0167	-0.0181	0.0113	0.026	-0.0198	-0.0465	0.0161	0.0189	-0.0015
ICSR 29	-0.0875	0.0171	-0.0172	0.0211	0.0277	-0.0293	-0.0396	0.0156	0.0082	-0.0044
1131B	-0.0835	0.0141	-0.0109	0.0231	0.01	0.0146	0.0448	-0.0249	0.0117	-0.004
ICSV 202	0.0766	0.0388	-0.119	0.0286	-0.025	-0.0183	-0.0344	-0.1079	0.0177	0.0085
MR 933	-0.086	0.017	-0.0118	0.0148	0.0233	-0.0195	-0.0336	0.0118	0.008	-0.0046
IS 7534C	-0.0889	0.0178	-0.0158	0.0209	0.0305	-0.0251	-0.0363	0.0098	0.0072	-0.0004
IS 7506C	-0.0883	0.0172	-0.0159	0.0209	0.0283	-0.0213	-0.0301	0.0099	0.0045	-0.0023
PM 17681	-0.0867	0.0168	-0.015	0.0194	0.0246	-0.0207	-0.0313	0.0121	0.0044	-0.0027
PM 12707	-0.0782	0.0139	-0.0077	0.0046	0.0117	0.0024	0.0119	0.0043	-0.0187	-0.0016
Broomcorn Sorghum	0.0816	0.1145	0.1066	0.0719	0.003	-0.0005	-0.0295	-0.018	0.0287	0.0675
IS 18483	0.0803	0.1305	0.2396	0.0736	0.0503	0.0083	-0.0967	-0.061	-0.0153	0.0333
SPL 23R	-0.0775	0.0097	-0.0069	-0.0023	-0.0391	-0.0439	-0.0578	0.0083	0.0027	0.0146
PS 28020-2	0.0804	0.1307	0.241	0.0728	0.0491	0.0086	-0.0974	-0.0599	-0.0138	0.0334
M 55799	0.0755	0.0487	-0.105	-0.0356	-0.0009	0.0555	-0.0255	-0.0066	0.0747	-0.09
MB 926	-0.0779	0.0122	-0.0071	0.0112	0.007	0.0123	0.0262	-0.0031	-0.02	0.0024
MB 906	0.0264	0.017	0.0789	-0.1299	0.0635	0.0199	0.0062	0.0007	-0.0157	0.2648
19518	-0.0884	0.0169	-0.0168	0.022	0.0283	-0.0275	-0.0408	0.0125	0.0071	-0.0018
DORADO	-0.0071	-0.0801	-0.006	-0.0137	0.0159	-0.0579	-0.0358	0.0081	0.0367	-0.0112
IS 16046	0.093	0.1142	-0.0989	0.0957	-0.0779	-0.1321	0.0665	-0.0138	-0.0601	0.0511
Nankou Sorghum	-0.0812	0.0143	-0.0045	0.0093	-0.0079	0.0191	0.0418	-0.0257	-0.0038	-0.0095
Bai Wudalang	-0.0459	-0.012	0.0572	0.0319	-0.1275	0.1839	0.2336	-0.1243	0.0914	-0.0348
White Sorghum	-0.087	0.016	-0.0143	0.018	0.0215	-0.0216	-0.0299	0.0068	0.0052	-0.0044
Heniyan	-0.086	0.0156	-0.0158	0.018	0.0249	-0.0158	-0.0211	0.0073	-0.0026	-0.003
Leoti	-0.0845	0.0171	-0.0115	0.0096	0.0142	-0.0131	-0.0174	0.0038	0.0076	-0.0106
IS 2508C	-0.086	0.0158	-0.0122	0.0189	0.0151	-0.0095	-0.0086	-0.001	0.0032	-0.0084
East Of Shanhaiguan Sorghum	-0.0827	0.0149	-0.0098	0.0125	0.0104	0.0007	0.0148	-0.0047	-0.0101	0.0002
14-T545	-0.0792	0.0125	-0.007	0.0039	0.0093	0.0056	0.0158	-0.0029	-0.022	-0.0014
Suda×ST11	-0.0854	0.0147	-0.0148	0.0185	0.0263	-0.0174	-0.0229	0.0096	-0.0054	-0.002
ICSB 59	-0.0796	0.015	-0.006	0.0069	-0.0039	0.01	0.0324	-0.018	-0.0069	-0.0102
Sugar Sorghum(Susong)	-0.079	0.0127	-0.0042	0.0139	-0.0024	0.024	0.0561	-0.0276	-0.0072	-0.0028
14-T532	-0.0716	0.0036	0.0098	0.0156	-0.0486	0.0851	0.1569	-0.0866	0.033	-0.0354
Moctac Local	-0.0784	0.0124	-0.0097	0.0074	0.0145	0.0056	0.0238	-0.002	-0.0143	-0.0018
741324 White	-0.0871	0.0166	-0.0154	0.0202	0.0289	-0.0236	-0.0357	0.0117	0.0059	-0.0022
Early Hegarl	-0.0884	0.0169	-0.0142	0.0163	0.0285	-0.0264	-0.0378	0.0136	0.0125	-0.0073
N91R	0.0684	-0.1775	0.0029	0.1312	-0.0067	0.0399	-0.0603	0.0212	0.002	-0.0148
6B	-0.0406	0.0361	-0.0298	0.0238	0.0032	-0.0037	0.013	0.0358	-0.018	-0.0064
IS-6882C	0.0711	0.0541	0.1673	0.0295	0.0564	0.0676	-0.1246	-0.1503	0.0029	-0.057
Indian Amber	0.0893	0.1338	-0.0888	0.0568	-0.0465	-0.0352	0.0961	0.1182	-0.1068	-0.0209
Purdu9-15-30	-0.0837	0.0152	-0.0084	0.0108	0.0023	0.0055	0.0198	-0.016	-0.0014	-0.0067
V4B	0.054	-0.1527	-0.0164	0.0741	-0.0163	-0.0622	-0.0384	-0.0347	-0.0911	-0.0315
Banas Durra	0.0435	-0.1304	0.0294	0.1088	-0.0488	-0.0069	-0.0096	0.0411	0.0877	0.0683
14-T529	0.0503	-0.0592	-0.0051	-0.0112	0.0469	0.0027	0.0011	0.005	-0.0844	-0.1187
Habaifenzhi	0.0006	-0.0344	-0.0041	-0.1068	0.0902	0.1226	0.0534	-0.0016	-0.2362	0.167
Taerhuang	0.0695	0.1155	0.2383	0.0761	0.0324	0.0118	-0.0914	-0.0627	-0.0158	0.051
ICSB 50	-0.0849	0.0152	-0.015	0.0207	0.0226	-0.0188	-0.0273	0.0087	0.0048	-0.0065
Y-121(Waibohong)	-0.0817	0.0147	-0.0153	0.0125	0.0231	-0.0182	-0.0495	0.0187	0.0168	0.0011
Beiping No.7	0.0511	-0.1542	-0.0165	0.0844	-0.0192	-0.053	-0.0592	-0.0101	-0.0738	-0.0431
Purple Hull Sorghum	0.0743	0.0152	-0.0223	-0.0422	0.0663	0.0264	0.0233	-0.0064	-0.0659	-0.1096
Pearl Umbrella	0.0866	0.048	-0.1617	0.0299	-0.0462	-0.0169	-0.0494	-0.1312	0.0809	0.0656
14-T438-2	-0.0806	0.0242	-0.0059	0.0223	0.0318	-0.0218	-0.0474	0.0077	0.015	-0.0012
IS-7254C	0.0851	0.0939	-0.1134	0.0473	-0.0696	-0.0798	0.0292	0.0159	0.0414	0.0721
Hegarl	-0.0421	0.0214	-0.0061	0.0127	-0.0059	0.0707	0.1054	-0.109	-0.0242	-0.0617
Early Kalo	-0.023	-0.0122	0.0199	-0.1006	0.0087	0.0514	0.0266	0.0597	-0.1527	0.091
HC356/5346	-0.0005	-0.0362	-0.008	-0.1861	0.1043	0.0376	0.041	-0.0063	-0.0877	0.0674
14-T456-1	0.0405	-0.031	0.0112	-0.1245	0.0303	0.0722	-0.0645	-0.0346	0.0602	-0.1448
90CCEDN343	0.0044	-0.0224	-0.0108	-0.1321	0.0825	0.122	0.0239	-0.0399	-0.1922	0.1752
Erchiban	-0.0046	-0.016	-0.0074	-0.0954	0.0558	0.1123	0.0116	-0.0237	-0.1741	0.1006
Black Hull-2	0.0742	0.0965	0.1317	0.0727	0.0014	0.0267	-0.0211	0.0285	-0.0183	0.0006
Atalas #899	0.0781	0.1246	0.2245	0.0627	0.0439	0.0056	-0.0771	-0.0427	-0.0109	0.0307
Darso Ok #1	0.0468	-0.1475	0.0363	0.1556	-0.0536	-0.02	0.0107	0.0554	-0.0055	0.031
Early Kalo(Grain Sorghum)Kansas	0.0733	-0.1605	0.0235	-0.0274	0.0706	-0.0174	0.0313	0.0027	0.0275	0.0706
Fetarita # 182	-0.0041	-0.0272	0.0494	-0.107	-0.2198	-0.0646	-0.0309	0.028	0.0145	0.0183
Grohoma # 920	-0.0269	-0.0057	0.0673	-0.1555	-0.3195	-0.019	-0.1023	0.0154	-0.0413	-0.0056
IS 1134C	0.0539	-0.1279	-0.0294	0.0021	0.035	0.0244	-0.0649	0.0098	0.004	0.0574
IS 1335C-1	0.0688	-0.1142	-0.0567	0.0897	-0.0304	0.0625	-0.1094	-0.0068	0.1541	0.0434
IS 3911C	0.068	0.0004	-0.0273	-0.121	0.093	-0.029	0.0625	0.0065	0.0195	-0.0887
IS 3071C	-0.0792	0.0195	-0.0103	0.0112	0.0228	-0.0161	-0.05	0.0177	0.0155	0.008
IS 5554C	-0.0875	0.0164	-0.0161	0.0193	0.0286	-0.0252	-0.0372	0.0156	0.0062	-0.0026
IS 5892C	0.0386	-0.0467	0.0698	0.0805	-0.0611	0.0709	0.1146	0.0824	-0.0349	-0.0599
IS 2662C	0.0781	0.1013	-0.0415	0.0565	-0.0141	-0.049	0.1093	0.1034	-0.1442	-0.0985
Dawn Kafir-2	0.0743	0.0909	-0.1352	-0.0453	-0.0056	0.1234	-0.0636	-0.0515	0.0665	0.2056
Bwheelland-2	0.0953	0.0674	-0.1289	0.0348	-0.0542	-0.0714	-0.0273	-0.1376	-0.0125	0.0324
