# Supplementary material for: The Identification of a Yield-Related Gene Controlling Multiple Traits Using GWAS in Sorghum (Sorghum bicolor L.)
Source: Plants (Basel). 2023 Apr 4;12(7):1557. doi: 10.3390/plants12071557 (PMC10097259; doi:10.3390/plants12071557)
Supplement: Supplementary file 1 [file plants-12-01557-s001.zip › Table S4.xlsx]

## Sheet: Table S4
Table S4 The all phenotype data of all 214 landraces.
Variety name	Heading date (days)	Plant height (m)	Spike type	Spike length (cm)	Number of internodes	100-grain weight (x10 g)
Bishon Kafir # 841	49.8333	1.505	1	22.5	7.5	2.64333
Bird Proof Kafer #662	52.25	2.455	2	28.5	9.66667	2.25444
Kaferita # 812	51.75	1.51833	1	18.4167	8.66667	3.03111
Cock Feterita	49.75	1.475	1	22.8333	7.83333	2.79667
Darso Ok #1	NA	NA	NA	NA	NA	NA
Early Kalo(Grain Sorghum)Kansas	47.9167	1.26	2	27.6667	5.66667	2.29667
Early Red Kafir #866	52.1667	1.5775	1	31	7.75	1.99556
Early Hegari SA #281	65	1.3825	1	19.4167	10.3333	2.66111
Fetarita # 182	54	2.31	1	22.3333	12.8333	3.69333
Grohoma # 920	51.25	1.64	1.5	23.5	9	2.78875
Hegari # 750	66.5833	1.86333	1	22.6667	14.8333	2.83111
IS 339	64.1667	1.79333	1	18	17.6667	3.03222
IS 1139C	60.9167	0.690833	1	13.75	11.1667	2.44333
IS 8544	NA	2.22	1	20.8333	20.8333	2.70222
IS 1159C	49.1667	1.41167	3.5	33.8333	4	2.71222
IS 1335C-1	59.0833	0.893333	1	18	5.83333	2.76857
IS 2177C	59.8333	0.993333	2	22.3333	9	2.27667
IS 2279C	70.6667	1.33167	1	22.6667	15.3333	2.34667
IS 3477C-2	58.1667	1.10167	3	35.3333	9.33333	3.38482
IS 3911C	53.8333	1.225	3	29.5	7.83333	1.995
IS 3071C	73.6667	0.93	4	17	10.6667	2.69167
IS 4639C	56.5	1.03167	1	14	6.66667	1.89333
IS 4884C	50.25	0.988333	4	32.5	7	1.93333
IS 5554C	64.6667	0.980833	2	14.25	9.33333	2.07667
IS 5769C	69.25	1.83833	1	17.8333	8.83333	2.10667
IS 5892C	61	0.891667	4	25.3333	6	1.49
IS 8070	NA	1.63333	1	15.8333	14.6667	3.93667
IS 6440C	68.875	0.919	1	20.3	9.63333	2.37
IS 2508C	64	0.73	1	21.6667	7.66667	2.51
IS 2662C	53.6667	1.65167	1	19.5	8.66667	3.33556
IS-6882C	61.5833	1.125	1	23.5	11	1.99833
IS-24989	NA	2.98667	NA	19.6667	22	3.48
IS-7254C	54.5833	1.38667	1	19.3333	7.16667	2.33
Black Amber # 7308	45.5	2.075	3	26.6667	6.5	1.87
Banas Durra	54.5	2.75	3	21	11.6667	1.6
Atalas #899	73.6667	2.485	1	21.5	11.8333	2.28
IS 2825	82.5	1.41833	1	17.1667	14.1667	3.31778
ICSB 59	58	1.05167	1.5	28.1667	8.83333	1.85333
ICSB 50	67	1.075	1.5	21	10	3.16667
Dval	NA	NA	NA	NA	NA	NA
Early Wheatland B	47.5	0.888333	2.5	25	7.33333	2.86111
Early Hegarl	51.75	1.31167	1	19.1667	10.3333	2.8875
Early Kalo	51.4167	1.27833	2.5	27.5	6.83333	2.53833
Fuji A	50.6667	1.785	1.5	23.6667	7.83333	1.74111
Hegarl	53	1.37333	1	23	10	2.22042
Indian Amber	56.9167	1.74833	1.5	29.1667	10.3333	2.62
Leoti	41.0833	1.79667	3	35.8333	5	2.215
02-512	56.5	1.73833	5	NA	8.66667	1.56778
Broom Sorghum	50.1667	3.32333	4	NA	9.16667	2.46667
Dawn Kafir-1	55	1.57667	1	25	9.33333	2.17333
Dawn Kafir-2	55	1.57667	1	25	8	2.17333
White Martin	NA	NA	NA	NA	NA	NA
Mays Amber	NA	NA	NA	NA	NA	NA
Mocktak	44.75	2.33333	4	29.1667	8	2.32167
Moctac Local	49.25	2.40167	2	19.6667	8.98333	2.325
Combine Kafir 60-1	58	1.72333	1.5	21.5	12.1667	2.58889
Saccaline	50.6667	2.985	3	29.6667	9.83333	2.65444
Suda×ST11	39.0833	1.28333	2.5	20.25	6	1.88111
14-T438-2	48	2.29333	2.5	28.3333	6.01667	2.13
14-T456-1	NA	NA	NA	NA	NA	NA
14-T458-2	51	2.89833	4	35.6667	8.5	1.65667
14-T529	NA	NA	NA	NA	NA	NA
14-T532	NA	NA	NA	NA	NA	NA
14-T545	59.75	2.175	4	NA	9.16667	1.63833
Jinliang No.5	54.5	1.43667	2	23	9.16667	3.18
Sanchisan	48.25	1.30333	2.5	21.3333	7.66667	3.37667
Tx3197B	50.5	1.01833	1	24.3333	9	2.9475
Tx623B	60.25	1.17	1	31.6667	8.66667	2.975
V4B	58.25	1.25	1	24.5	10.3333	3.50889
Purple Hull Sorghum	53.3333	3.15167	4	39.8333	10.1667	2.54222
Taerhuang	52.5	2.49167	2	24.3333	10	3.04667
Combine Kafir 60-2	58.75	1.73667	1	22.9167	12.1667	2.72556
Sugar Sorghum3#	66.3333	2.29167	1	16.5	11	1.41111
Black Hull-1	61	3.59	5	NA	12.6667	2.01778
Black Hull-2	61	3.59	5	24.6667	10.7333	2.02
741324 White	55	1.205	1	27	9	3.095
M1010B	53.5	1.07333	1	22.8333	8.66667	3.2
HC356/5346	64.75	1.45583	1.5	24.3333	10	2.89
Zhe43R	47.5	1.28333	1	30.6667	9	3.43667
Dali 105	84.3333	2.69667	1.5	18	15	3.97111
Y-121(Waibohong)	43.0833	1.67333	1	16.6667	8.33333	2.29111
XianmiSorghum	50.1667	2.775	3.5	34.5	8.66667	2.33
88BP28	62.0833	1.185	1.5	28.3333	9.33333	2.52556
6B	59.75	1.04333	1.5	25.1667	9.66667	2.16
Purdu9-15-30	62.75	1.42333	2	26.6667	11.5	3.15778
P-10	44.25	1.11	1.5	28.1667	4.5	2.33367
N91R	65.75	1.40167	1.5	34	13.3333	2.46833
MalisorB4-7	63.3333	1.29333	1	26.3333	11.5	2.25
94M4108	60.5833	0.945	1.5	28.8333	8.66667	2.64833
90CCEDN343	60.75	1.22333	1.5	28	12.3333	3.28222
Qiye	51	1.22333	1.5	18.8333	9.66667	2.18556
Erchiban	42	1.39833	3	24.3333	6.66667	2.77
Pedicel Half Bone	41.4167	2.83667	4	35	8.16667	2.19167
Sugar Sorghum	53.1667	2.70167	1.5	18.8333	9.83333	1.92
Red Sorghum	NA	NA	NA	NA	NA	NA
Ke137R	67.5	3.57	3.5	29	11.6	3.01
Ke127R	36.5	1.55167	1.5	23.6667	5.5	2.815
Beiping No.7	45.25	2.4	2	21.6667	8	2.63333
Beiping No.3	63	3.72667	4	34.6667	10.3333	2.865
Sugar Sorghum(Susong)	52.5833	2.63833	5	23.3333	9.5	2.08556
Sugar Sorghum(Sixian)	56	3.12167	1	13.6667	12	1.815
Sugar Sorghum(Fanchang)	46.5	2.7	3	27	8.33333	2.505
Sugar Sorghum(Chaoxian)	44.75	2.41833	3.5	26.5	7.5	2.58222
Loose Panicle Red Hull Dwarf Sorghum	37	1.775	4	34.6667	7	2.035
Haidian Red Sorghum	54.5	3.52667	4	33.3333	14.6667	2.38167
Yellow Sticky Sorghum	53	2.87333	4	38	10.6667	3.01778
Sticky Sorghum	46.0833	2.70667	4	39	7.75	2.63778
Chuotuihan	46.75	2.80333	3	25.1667	9.83333	3.06889
Dwarf Sorghum	50.1667	1.17333	1	18.5	8.83333	3.14
Dwarf Sorghum	64	1.765	2.5	30.3333	11.5	1.98
Sweet Election 14(5006-3)	65.4167	2.52167	2	25.3333	13.3333	1.56889
East Of Shanhaiguan Sorghum	42.4167	1.31333	2.5	23.4167	7.33333	2.80333
Pearl Umbrella	51.75	2.23333	2.5	31.3333	10	2.20556
Waibozhang	39.4167	1.93333	2	17.5	7.16667	2.04167
Habaifenzhi	69	1.85	1.5	23	11.3333	2.84
Huangluoshan	39.1667	1.91667	2.5	22.4167	6	1.94667
White Sorghum	59	1.96667	2	24.3333	9.5	2.855
Peitouhong	43.25	1.14833	2	22.1667	7.33333	2.545
Pearl White	NA	NA	NA	NA	NA	NA
Black Hull Sorghum	45.25	3.385	4	38.5	9.5	2.215
Jingyang Red Sorghum	45.25	2.55	2.5	23.5	9.66667	2.69111
M-60839	68.25	1.89	2.5	33.75	15.5	3.49667
E35-1	66.5833	2.39	1	20.1667	15.3333	3.76333
B8B	72.25	1.07667	1.5	21	10.8333	2.99333
A16023-1	68.75	1.69	1.5	30.5	11.9167	3.435
A16023-2	68.75	1.69	1.5	32.3333	11.9167	3.44
IS 955004	70.5833	1.795	1.5	18.6667	11.3333	2.71667
ICS16B	54.8333	1.07333	1	23.1667	9.16667	2.59333
5-46796	63.75	1.41167	1.5	28.1667	9.33333	3.16556
LR-226	56.5833	1.10667	2	25	9.83333	3.48833
L-402B	59.1667	1.175	2.3	31.1667	9.83333	2.35333
ICSB 102	66.6667	2.04833	1	26	12.6667	3.185
ICSB 88	70	1.29833	1.5	24.3333	11.3333	1.41333
ICSB 70	64.75	1.58167	1	24	12.1667	3.275
White Sticky Sorghum	52.8333	2.98333	4	30	10.5	2.34444
Double Grain Sorghum	44.75	2.65167	3.5	28	8.58333	2.99833
Lishihuang	51.3333	2.39833	2	21.1667	9.5	2.82667
Geta Sorghum	NA	NA	NA	NA	NA	NA
Red Hull Sorghum	48.9167	2.08667	2	25.6667	8	2.68556
ICSH 25	51.5833	1.37167	2	24.1667	7.66667	3.11
IS 1134C	59.6667	1.18583	1	21	6.3	2.59667
ICSH 16	59.5	1.12333	1	20	9.5	2.48333
IS 9308	54.0833	2.03667	1.5	20.0833	7.33333	2.54278
ICSV 197	59.5	2.32167	1.5	28	10	2.74667
ICSR88004	68.4167	1.72833	1.5	28.3333	13	3.145
ICSR 145	74.6667	1.93	1	23.5	13.5	2.38833
ICSR 41	64.5	1.51333	2	28.1667	12.1667	3.07667
ICSR 29	67.25	1.31833	1	29.1667	11.5	3.25222
GR108-90M24	63.5	1.31667	1.5	29.6667	9.5	2.63556
Bwheelland-1	58	1.115	4	24.5	9.16667	3.32556
Bwheelland-2	58	1.11667	4	23.6667	9.16667	3.32556
1131B	58	1.06333	1	31.3333	7.48333	2.575
ICSV 202	69.25	1.315	2	27.3333	11.6667	2.68222
ICSV 210	69.8333	1.975	1.5	23	11.8333	2.78222
MR 933	68	1.52667	1	26.5	12.3333	2.66667
IS 7534C	NA	NA	NA	NA	NA	NA
IS 7506C	50.6667	1.66833	3.5	28.1667	6	3.12111
IS 7502C	38.4167	0.82	2.5	19	2	3.3
PM 17681	56	1.29667	2.5	31.3333	7.33333	2.39667
PM 17413	60	1.555	1	24.3333	10	2.84167
PM 12707	62	1.27	1	24.3333	9.5	2.65333
PM 12653	75.8333	1.00833	1	21.5	7	2.73
Broomcorn Sorghum	49.1667	2.73833	5	NA	7.33333	2.15167
IS 22238	NA	NA	NA	NA	NA	NA
IS 18483	NA	NA	NA	NA	NA	NA
19504	70.5833	1.58167	2	32.1667	13.6667	3.12222
SPL 23R	70.3333	1.94167	1.5	24	12.3333	2.53333
PS 28020-2	61	1.38	1.5	31.8333	11.8333	2.785
M 55799	63	2.06833	2.5	35.5833	9.25	2.95667
MB 926	65.8333	1.35333	1.5	24.6667	11.5	3.11333
MB 906	68.3333	1.53167	2.5	30.6667	11.1667	3.33333
IS-24999	NA	3.03833	2	21.1667	17.3333	2.77556
19518	73.25	2.415	1.5	27	12	2.79222
S.O.102	38.25	0.963333	4	23.25	3.91667	2.41
77CS5388	60.25	1.20333	1	20.5	9.5	2.90111
5-46394	NA	NA	NA	NA	NA	NA
DORADO	62.0833	1.24667	1	27.5	9.41667	3.52556
IS 16046	NA	NA	NA	NA	NA	NA
IS 10477	51.3333	2.52167	1.5	21.5	10.8333	3.03444
KS153-1	51.25	0.933333	1	24.6667	6	2.48833
Third Generation Sorghum	40.0833	1.50667	2.5	21.6667	6.5	4.02667
Nankou Sorghum	35.5	2.04167	3.5	22.8333	6.83333	2.585
Beiping No.7	39	2.02167	4	29.3333	7.66667	1.48
Bai Wudalang	50.1667	1.24	2.5	21.3333	6.83333	2.86444
White Sorghum	51.6667	2.63667	4	28.6667	7.66667	2.86
Heniyan	47.75	2.98833	4	36.6667	9.83333	2.29222
CSZ1	57	2.97167	4	45.8333	7.66667	2.17833
CSZ3	NA	3.825	4	32.6667	16.1667	1.94333
CSZ7	62	2.33667	3	33.4333	12.0417	2.21778
CSZ9	69	2.14	3	28.3333	14.6667	2.40833
CSZ13	63.5	3.12	4	35.3333	12	2.34667
CSz15	69	3.9575	4	25.3444	12.5	2.15444
CSZ19	54.5	3.1	4	24.1667	10.5	1.925
CSZ30	42	2.17833	4	27.4167	6.83333	1.11333
CSZ31	66.5	2.92833	4	25.3333	10.5	1.93111
CSZ32	50.5	2.4	4	30.8778	7.66667	2.01667
CSZ33	50.5	2.31333	4	34.2333	8.33333	2.18222
CSZ36	62	3.06667	4	34.1	11.3333	2.43667
CSZ37	84	3.5	4	28.4333	15.8333	2.21
CSZ39	43	1.82	4	30.0778	6	1.80333
CSZ40	70	3.46333	4	29.8889	13.1667	2.11556
CSZ41	NA	NA	NA	NA	NA	NA
CSZ53	52.5	1.40833	4	31.1	7.83333	1.66833
CSZ54	52	2.50167	4	28.7778	8	1.77111
CSZ57	51.5	1.43333	4	33.2111	7.33333	1.77333
CSZ58	35.5	2.045	4	28.1	6.16667	1.62667
CSZ59	NA	3.59333	4	30.6556	17.1667	1.865
CSZ60	43.5	2.51833	4	25.2	8.5	2.46833
CSZ61	44	1.52833	4	27.9889	7.66667	2.35778
CSZ64	49	2.35	4	31	6.91667	2.78333
CSZ66	39.5	2.42667	4	24.2333	6.91667	1.61333
CSZ70	NA	3.76	4	32.2222	17	2.37833
CSZ90	NA	NA	NA	NA	NA	NA
CSZ92	50.5	2.185	4	35.937	8.33333	2.50333
