# Supplementary material for: The Identification of a Yield-Related Gene Controlling Multiple Traits Using GWAS in Sorghum (Sorghum bicolor L.)
Source: Plants (Basel). 2023 Apr 4;12(7):1557. doi: 10.3390/plants12071557 (PMC10097259; doi:10.3390/plants12071557)
Supplement: Supplementary file 1 [file plants-12-01557-s001.zip › Table S5.xlsx]

## Sheet: Heading date
Table S5 The analysis of SNPs which exceeded threshold using the emmax model.
Trait	Model	Chr	Pos	Pvalue	'-log10P	Allele	Count	MAF
Heading date	emmax	NC_012875.2	5979555	9.97e-10	9	C/G	C:398_G:30	0.07
Heading date	emmax	NC_012875.2	5979863	1.27e-09	8.9	T/C	T:396_C:30	0.07
Heading date	emmax	NC_012875.2	5982356	1.27e-08	7.89	G/C	G:402_C:26	0.06

## Sheet: Plant height
Trait	Model	Chr	Pos	Pvalue	'-log10P	Allele	Count	MAF

## Sheet: Spike type
Trait	Model	Chr	Pos	Pvalue	'-log10P	Allele	Count	MAF
Spike type	emmax	NC_012874.2	57883609	1.4317e-09	8.84	C/T	C:366_T:46	0.11
Spike type	emmax	NC_012874.2	69889266	2.9176e-08	7.53	C/T	C:322_T:36	0.1
Spike type	emmax	NC_012874.2	69894056	6.9397e-09	8.16	T/C	T:312_C:60	0.16
Spike type	emmax	NC_012874.2	69898307	2.9223e-08	7.53	G/A	G:385_A:37	0.09
Spike type	emmax	NC_012874.2	69901863	1.1641e-08	7.93	C/T	C:388_T:34	0.08

## Sheet: Spike length
Trait	Model	Chr	Pos	Pvalue	'-log10P	Allele	Count	MAF
Spike length	emmax	NC_012878.2	693128	2.1969e-08	7.66	G/C	G:340_C:26	0.07
Spike length	emmax	NC_012871.2	8548919	6.674e-10	9.18	C/T	C:344_T:24	0.07
Spike length	emmax	NC_012879.2	12219209	3.5596e-10	9.45	A/G	A:209_G:219	0.49
Spike length	emmax	NC_012871.2	13324166	9.9738e-09	8	G/A	G:384_A:24	0.06
Spike length	emmax	NC_012874.2	24206421	3.5395e-08	7.45	C/T	C:367_T:61	0.14
Spike length	emmax	NC_012874.2	25368244	1.9185e-11	10.72	C/T	C:209_T:219	0.49
Spike length	emmax	NC_012876.2	30772912	1.3805e-08	7.86	G/A	G:217_A:211	0.49
Spike length	emmax	NC_012876.2	30772937	1.3805e-08	7.86	A/G	A:217_G:211	0.49
Spike length	emmax	NC_012874.2	32073376	1.3327e-09	8.88	A/G	A:330_G:18	0.05
Spike length	emmax	NC_012874.2	33065599	2.0292e-08	7.69	C/A	C:334_A:18	0.05
Spike length	emmax	NC_012874.2	38249257	9.9644e-11	10	T/G	T:328_G:18	0.05
Spike length	emmax	NC_012874.2	45313180	2.5495e-09	8.59	G/A	G:342_A:18	0.05
Spike length	emmax	NC_012876.2	46079183	1.8702e-09	8.73	T/C	T:209_C:215	0.49
Spike length	emmax	NC_012876.2	46678809	1.0942e-08	7.96	T/C	T:397_C:23	0.05
Spike length	emmax	NC_012876.2	48829222	3.1715e-08	7.5	G/A	G:406_A:22	0.05
Spike length	emmax	NC_012876.2	49250801	4.5682e-09	8.34	G/T	G:214_T:208	0.49
Spike length	emmax	NC_012879.2	54189257	1.5899e-08	7.8	T/C	T:405_C:23	0.05
Spike length	emmax	NC_012879.2	56992117	3.4886e-08	7.46	G/C	G:387_C:21	0.05
Spike length	emmax	NC_012874.2	58778631	2.3017e-08	7.64	G/A	G:400_A:26	0.06
Spike length	emmax	NC_012872.2	72466748	1.4471e-08	7.84	A/G	A:398_G:24	0.06
Spike length	emmax	NC_012871.2	76380755	2.0468e-09	8.69	A/G	A:210_G:218	0.49

## Sheet: Number of internodes
Trait	Model	Chr	Pos	Pvalue	'-log10P	Allele	Count	MAF

## Sheet: 100-grain weight
Trait	Model	Chr	Pos	Pvalue	'-log10P	Allele	Count	MAF
