# Supplementary material for: The Identification of a Yield-Related Gene Controlling Multiple Traits Using GWAS in Sorghum (Sorghum bicolor L.)
Source: Plants (Basel). 2023 Apr 4;12(7):1557. doi: 10.3390/plants12071557 (PMC10097259; doi:10.3390/plants12071557)
Supplement: Supplementary file 1 [file plants-12-01557-s001.zip › Table S6.xlsx]

## Sheet: Heading date
Table S6 The analysis of SNPs which exceeded threshold using the fastlmm model.
Trait	Model	Chr	Pos	Pvalue	'-log10P	Allele	Count	MAF
Heading date	fastlmm	NC_012875.2	5979555	4.53082e-10	9.34	C/G	C:398_G:30	0.07
Heading date	fastlmm	NC_012875.2	5979863	5.08686e-10	9.29	T/C	T:396_C:30	0.07
Heading date	fastlmm	NC_012875.2	5982356	8.71066e-09	8.06	G/C	G:402_C:26	0.06

## Sheet: Plant height
Trait	Model	Chr	Pos	Pvalue	'-log10P	Allele	Count	MAF
Plant height	fastlmm	NC_012874.2	1992075	1.6466e-08	7.78	T/A	T:373_A:49	0.12

## Sheet: Spike type
Trait	Model	Chr	Pos	Pvalue	'-log10P	Allele	Count	MAF
Spike type	fastlmm	NC_012874.2	57883609	1.33629e-09	8.87	C/T	C:366_T:46	0.11
Spike type	fastlmm	NC_012874.2	69894056	6.02816e-09	8.22	T/C	T:312_C:60	0.16
Spike type	fastlmm	NC_012874.2	69901863	1.29338e-08	7.89	C/T	C:388_T:34	0.08
Spike type	fastlmm	NC_012874.2	69898307	2.77912e-08	7.56	G/A	G:385_A:37	0.09
Spike type	fastlmm	NC_012874.2	69889266	2.89766e-08	7.54	C/T	C:322_T:36	0.1

## Sheet: Spike length
Trait	Model	Chr	Pos	Pvalue	'-log10P	Allele	Count	MAF
Spike length	fastlmm	NC_012877.2	41011611	8.00319e-21	20.1	T/C	T:215_C:213	0.5
Spike length	fastlmm	NC_012870.2	78754636	8.00319e-21	20.1	C/T	C:215_T:213	0.5
Spike length	fastlmm	NC_012874.2	45313180	3.81772e-13	12.42	G/A	G:342_A:18	0.05
Spike length	fastlmm	NC_012874.2	22945302	7.4616e-12	11.13	C/T	C:330_T:20	0.06
Spike length	fastlmm	NC_012871.2	16380992	8.05469e-12	11.09	G/A	G:368_A:22	0.06
Spike length	fastlmm	NC_012874.2	35186571	1.07863e-11	10.97	G/C	G:400_C:22	0.05
Spike length	fastlmm	NC_012874.2	33065599	1.23705e-11	10.91	C/A	C:334_A:18	0.05
Spike length	fastlmm	NC_012879.2	56992117	1.38599e-11	10.86	G/C	G:387_C:21	0.05
Spike length	fastlmm	NC_012879.2	54189257	1.63429e-11	10.79	T/C	T:405_C:23	0.05
Spike length	fastlmm	NC_012874.2	25368244	2.94179e-11	10.53	C/T	C:209_T:219	0.49
Spike length	fastlmm	NC_012879.2	12219209	6.64405e-11	10.18	A/G	A:209_G:219	0.49
Spike length	fastlmm	NC_012874.2	4054791	7.14388e-11	10.15	A/T	A:340_T:18	0.05
Spike length	fastlmm	NC_012871.2	9077944	7.49798e-11	10.13	A/G	A:399_G:23	0.05
Spike length	fastlmm	NC_012871.2	8548919	7.64393e-11	10.12	C/T	C:344_T:24	0.07
Spike length	fastlmm	NC_012876.2	46079183	9.33098e-11	10.03	T/C	T:209_C:215	0.49
Spike length	fastlmm	NC_012874.2	4051951	9.97928e-11	10	G/A	G:338_A:18	0.05
Spike length	fastlmm	NC_012874.2	31318406	1.04826e-10	9.98	G/T	G:342_T:18	0.05
Spike length	fastlmm	NC_012874.2	38249257	1.18631e-10	9.93	T/G	T:328_G:18	0.05
Spike length	fastlmm	NC_012874.2	42809227	1.23308e-10	9.91	G/A	G:406_A:22	0.05
Spike length	fastlmm	NC_012874.2	45841565	1.3022e-10	9.89	A/G	A:204_G:220	0.48
Spike length	fastlmm	NC_012874.2	25367528	1.44512e-10	9.84	G/C	G:206_C:222	0.48
Spike length	fastlmm	NC_012874.2	25489045	1.44512e-10	9.84	G/A	G:206_A:222	0.48
Spike length	fastlmm	NC_012874.2	25489125	1.44512e-10	9.84	A/G	A:206_G:222	0.48
Spike length	fastlmm	NC_012874.2	25489131	1.44512e-10	9.84	C/T	C:206_T:222	0.48
Spike length	fastlmm	NC_012874.2	31700684	1.44512e-10	9.84	A/T	A:222_T:206	0.48
Spike length	fastlmm	NC_012874.2	31700779	1.44512e-10	9.84	A/C	A:222_C:206	0.48
Spike length	fastlmm	NC_012874.2	41697063	1.44512e-10	9.84	A/G	A:206_G:222	0.48
Spike length	fastlmm	NC_012874.2	41755897	1.44512e-10	9.84	C/T	C:206_T:222	0.48
Spike length	fastlmm	NC_012874.2	41755911	1.44512e-10	9.84	T/C	T:206_C:222	0.48
Spike length	fastlmm	NC_012874.2	41756011	1.44512e-10	9.84	C/T	C:206_T:222	0.48
Spike length	fastlmm	NC_012874.2	41756031	1.44512e-10	9.84	G/A	G:206_A:222	0.48
Spike length	fastlmm	NC_012874.2	41756037	1.44512e-10	9.84	T/C	T:206_C:222	0.48
Spike length	fastlmm	NC_012874.2	41756096	1.44512e-10	9.84	T/G	T:206_G:222	0.48
Spike length	fastlmm	NC_012874.2	41756125	1.44512e-10	9.84	G/T	G:206_T:222	0.48
Spike length	fastlmm	NC_012874.2	41756192	1.44512e-10	9.84	G/A	G:206_A:222	0.48
Spike length	fastlmm	NC_012874.2	45389685	1.44512e-10	9.84	T/G	T:206_G:222	0.48
Spike length	fastlmm	NC_012874.2	47088357	1.44512e-10	9.84	T/C	T:223_C:205	0.48
Spike length	fastlmm	NC_012874.2	47098136	1.44512e-10	9.84	T/C	T:223_C:205	0.48
Spike length	fastlmm	NC_012874.2	47199987	1.44512e-10	9.84	G/T	G:205_T:223	0.48
Spike length	fastlmm	NC_012874.2	47203000	1.44512e-10	9.84	C/T	C:223_T:205	0.48
Spike length	fastlmm	NC_012874.2	31318339	1.4754e-10	9.83	G/A	G:338_A:20	0.06
Spike length	fastlmm	NC_012874.2	57633713	1.50728e-10	9.82	T/C	T:359_C:19	0.05
Spike length	fastlmm	NC_012871.2	20100368	1.57338e-10	9.8	T/C	T:406_C:22	0.05
Spike length	fastlmm	NC_012876.2	46678809	1.70544e-10	9.77	T/C	T:397_C:23	0.05
Spike length	fastlmm	NC_012874.2	28744730	1.93117e-10	9.71	G/A	G:327_A:19	0.05
Spike length	fastlmm	NC_012874.2	45655833	1.95284e-10	9.71	A/G	A:328_G:20	0.06
Spike length	fastlmm	NC_012874.2	47086804	1.9607e-10	9.71	G/A	G:223_A:203	0.48
Spike length	fastlmm	NC_012871.2	8750408	1.97492e-10	9.7	G/A	G:357_A:19	0.05
Spike length	fastlmm	NC_012874.2	31394148	2.13135e-10	9.67	C/T	C:330_T:18	0.05
Spike length	fastlmm	NC_012874.2	38843080	2.16988e-10	9.66	C/T	C:331_T:19	0.05
Spike length	fastlmm	NC_012874.2	22735562	2.43755e-10	9.61	T/C	T:332_C:18	0.05
Spike length	fastlmm	NC_012874.2	25857393	2.44071e-10	9.61	G/C	G:336_C:18	0.05
Spike length	fastlmm	NC_012874.2	25853365	2.46526e-10	9.61	T/A	T:332_A:18	0.05
Spike length	fastlmm	NC_012874.2	22487375	2.54357e-10	9.59	G/T	G:326_T:18	0.05
Spike length	fastlmm	NC_012874.2	38919417	2.64976e-10	9.58	G/T	G:338_T:18	0.05
Spike length	fastlmm	NC_012871.2	76380755	2.75624e-10	9.56	A/G	A:210_G:218	0.49
Spike length	fastlmm	NC_012871.2	13445899	2.80867e-10	9.55	T/C	T:338_C:18	0.05
Spike length	fastlmm	NC_012874.2	36405656	2.82812e-10	9.55	G/A	G:403_A:23	0.05
Spike length	fastlmm	NC_012874.2	16214479	2.91654e-10	9.54	C/A	C:334_A:18	0.05
Spike length	fastlmm	NC_012874.2	38203760	2.94582e-10	9.53	G/A	G:330_A:18	0.05
Spike length	fastlmm	NC_012874.2	43864576	2.96934e-10	9.53	A/T	A:340_T:18	0.05
Spike length	fastlmm	NC_012874.2	38238165	3.00076e-10	9.52	G/A	G:340_A:18	0.05
Spike length	fastlmm	NC_012874.2	28942333	3.02689e-10	9.52	A/C	A:326_C:18	0.05
Spike length	fastlmm	NC_012874.2	34801445	3.05887e-10	9.51	A/T	A:338_T:18	0.05
Spike length	fastlmm	NC_012874.2	38025005	3.07548e-10	9.51	C/T	C:336_T:18	0.05
Spike length	fastlmm	NC_012874.2	38136064	3.12033e-10	9.51	G/A	G:336_A:18	0.05
Spike length	fastlmm	NC_012874.2	38181488	3.20119e-10	9.49	G/A	G:330_A:18	0.05
Spike length	fastlmm	NC_012874.2	45620041	3.20216e-10	9.49	G/A	G:332_A:18	0.05
Spike length	fastlmm	NC_012874.2	29328632	3.26472e-10	9.49	G/A	G:332_A:18	0.05
Spike length	fastlmm	NC_012874.2	23436153	3.29187e-10	9.48	T/C	T:332_C:18	0.05
Spike length	fastlmm	NC_012874.2	32178539	3.36169e-10	9.47	G/A	G:338_A:18	0.05
Spike length	fastlmm	NC_012874.2	28160850	3.36965e-10	9.47	G/A	G:342_A:18	0.05
Spike length	fastlmm	NC_012874.2	24377043	3.38364e-10	9.47	C/A	C:326_A:18	0.05
Spike length	fastlmm	NC_012874.2	32177334	3.41792e-10	9.47	G/T	G:328_T:18	0.05
Spike length	fastlmm	NC_012874.2	31240163	3.50136e-10	9.46	C/T	C:332_T:18	0.05
Spike length	fastlmm	NC_012874.2	45824368	3.50991e-10	9.45	C/T	C:328_T:18	0.05
Spike length	fastlmm	NC_012874.2	37722880	3.51407e-10	9.45	A/G	A:326_G:18	0.05
Spike length	fastlmm	NC_012874.2	38799001	3.51859e-10	9.45	T/C	T:328_C:18	0.05
Spike length	fastlmm	NC_012874.2	39431008	3.52958e-10	9.45	T/G	T:328_G:18	0.05
Spike length	fastlmm	NC_012874.2	31203216	3.63014e-10	9.44	C/T	C:334_T:18	0.05
Spike length	fastlmm	NC_012874.2	38757272	3.64406e-10	9.44	G/A	G:328_A:18	0.05
Spike length	fastlmm	NC_012874.2	37685166	3.67212e-10	9.44	G/A	G:332_A:18	0.05
Spike length	fastlmm	NC_012874.2	28141711	3.69209e-10	9.43	C/T	C:336_T:18	0.05
Spike length	fastlmm	NC_012874.2	22290731	3.7319e-10	9.43	T/C	T:336_C:18	0.05
Spike length	fastlmm	NC_012874.2	31235905	3.74606e-10	9.43	T/A	T:332_A:18	0.05
Spike length	fastlmm	NC_012874.2	38204139	3.80341e-10	9.42	C/T	C:338_T:18	0.05
Spike length	fastlmm	NC_012874.2	30830978	3.80568e-10	9.42	G/A	G:330_A:18	0.05
Spike length	fastlmm	NC_012874.2	31222698	3.83953e-10	9.42	C/T	C:326_T:18	0.05
Spike length	fastlmm	NC_012874.2	31222722	3.83953e-10	9.42	T/A	T:326_A:18	0.05
Spike length	fastlmm	NC_012874.2	22488386	3.84874e-10	9.41	A/G	A:326_G:18	0.05
Spike length	fastlmm	NC_012874.2	29333001	3.84874e-10	9.41	G/T	G:326_T:18	0.05
Spike length	fastlmm	NC_012874.2	22491282	3.84874e-10	9.41	G/T	G:326_T:18	0.05
Spike length	fastlmm	NC_012874.2	29326131	3.84874e-10	9.41	A/G	A:328_G:18	0.05
Spike length	fastlmm	NC_012874.2	29328507	3.84874e-10	9.41	C/A	C:326_A:18	0.05
Spike length	fastlmm	NC_012874.2	29328811	3.84874e-10	9.41	T/G	T:328_G:18	0.05
Spike length	fastlmm	NC_012874.2	29329466	3.84874e-10	9.41	C/T	C:328_T:18	0.05
Spike length	fastlmm	NC_012874.2	37683360	3.87325e-10	9.41	C/T	C:330_T:18	0.05
Spike length	fastlmm	NC_012874.2	37679446	3.88963e-10	9.41	G/A	G:330_A:18	0.05
Spike length	fastlmm	NC_012874.2	42415493	3.88963e-10	9.41	C/T	C:330_T:18	0.05
Spike length	fastlmm	NC_012874.2	45811203	3.88963e-10	9.41	G/A	G:328_A:18	0.05
Spike length	fastlmm	NC_012874.2	29971892	3.92512e-10	9.41	C/T	C:332_T:18	0.05
Spike length	fastlmm	NC_012874.2	38777141	3.94405e-10	9.4	C/T	C:330_T:18	0.05
Spike length	fastlmm	NC_012874.2	38052463	3.97322e-10	9.4	G/A	G:340_A:18	0.05
Spike length	fastlmm	NC_012874.2	41404103	3.97449e-10	9.4	A/T	A:332_T:18	0.05
Spike length	fastlmm	NC_012874.2	38192274	3.99295e-10	9.4	G/A	G:332_A:18	0.05
Spike length	fastlmm	NC_012874.2	37678725	4.01039e-10	9.4	G/A	G:328_A:18	0.05
Spike length	fastlmm	NC_012874.2	32439048	4.02801e-10	9.39	A/G	A:336_G:18	0.05
Spike length	fastlmm	NC_012874.2	38061864	4.05175e-10	9.39	C/T	C:334_T:18	0.05
Spike length	fastlmm	NC_012874.2	30379432	4.07585e-10	9.39	T/A	T:326_A:18	0.05
Spike length	fastlmm	NC_012874.2	23498183	4.11381e-10	9.39	C/T	C:330_T:18	0.05
Spike length	fastlmm	NC_012874.2	31259967	4.1302e-10	9.38	A/T	A:332_T:18	0.05
Spike length	fastlmm	NC_012874.2	34801687	4.13266e-10	9.38	T/C	T:338_C:18	0.05
Spike length	fastlmm	NC_012874.2	38054933	4.13678e-10	9.38	T/G	T:326_G:18	0.05
Spike length	fastlmm	NC_012874.2	28021373	4.16032e-10	9.38	A/C	A:332_C:18	0.05
Spike length	fastlmm	NC_012874.2	31012279	4.17899e-10	9.38	G/T	G:332_T:18	0.05
Spike length	fastlmm	NC_012874.2	37836079	4.17899e-10	9.38	T/A	T:328_A:18	0.05
Spike length	fastlmm	NC_012874.2	28946376	4.18495e-10	9.38	C/T	C:328_T:18	0.05
Spike length	fastlmm	NC_012874.2	26125024	4.2377e-10	9.37	T/C	T:326_C:18	0.05
Spike length	fastlmm	NC_012874.2	31253766	4.24442e-10	9.37	A/T	A:326_T:18	0.05
Spike length	fastlmm	NC_012874.2	38922450	4.24442e-10	9.37	G/A	G:328_A:18	0.05
Spike length	fastlmm	NC_012874.2	23422715	4.24523e-10	9.37	G/T	G:328_T:18	0.05
Spike length	fastlmm	NC_012874.2	28766899	4.24523e-10	9.37	G/A	G:326_A:18	0.05
Spike length	fastlmm	NC_012874.2	43530757	4.24523e-10	9.37	G/T	G:328_T:18	0.05
Spike length	fastlmm	NC_012874.2	37705948	4.27058e-10	9.37	A/T	A:326_T:18	0.05
Spike length	fastlmm	NC_012874.2	38932048	4.27058e-10	9.37	A/G	A:326_G:18	0.05
Spike length	fastlmm	NC_012874.2	22406791	4.27058e-10	9.37	A/T	A:328_T:18	0.05
Spike length	fastlmm	NC_012874.2	45824898	4.29254e-10	9.37	C/T	C:340_T:18	0.05
Spike length	fastlmm	NC_012874.2	46689991	4.29608e-10	9.37	G/A	G:338_A:18	0.05
Spike length	fastlmm	NC_012874.2	23223982	4.31993e-10	9.36	T/C	T:326_C:18	0.05
Spike length	fastlmm	NC_012874.2	38883844	4.36107e-10	9.36	T/C	T:342_C:18	0.05
Spike length	fastlmm	NC_012874.2	25855001	4.36956e-10	9.36	T/C	T:330_C:18	0.05
Spike length	fastlmm	NC_012874.2	31010759	4.39067e-10	9.36	A/T	A:342_T:18	0.05
Spike length	fastlmm	NC_012874.2	44832050	4.39096e-10	9.36	G/A	G:332_A:18	0.05
Spike length	fastlmm	NC_012874.2	28951553	4.39102e-10	9.36	G/A	G:334_A:18	0.05
Spike length	fastlmm	NC_012874.2	44428269	4.40176e-10	9.36	G/C	G:332_C:18	0.05
Spike length	fastlmm	NC_012874.2	38252016	4.41369e-10	9.36	A/G	A:328_G:18	0.05
Spike length	fastlmm	NC_012874.2	38799482	4.41668e-10	9.35	G/T	G:334_T:18	0.05
Spike length	fastlmm	NC_012874.2	38898753	4.41707e-10	9.35	C/T	C:328_T:18	0.05
Spike length	fastlmm	NC_012874.2	24006816	4.45021e-10	9.35	C/A	C:332_A:18	0.05
Spike length	fastlmm	NC_012874.2	31042457	4.45389e-10	9.35	C/T	C:336_T:18	0.05
Spike length	fastlmm	NC_012874.2	22406566	4.4681e-10	9.35	C/T	C:326_T:18	0.05
Spike length	fastlmm	NC_012874.2	31204407	4.47578e-10	9.35	A/T	A:336_T:18	0.05
Spike length	fastlmm	NC_012874.2	22290489	4.48556e-10	9.35	G/A	G:330_A:18	0.05
Spike length	fastlmm	NC_012874.2	23427467	4.48556e-10	9.35	C/A	C:330_A:18	0.05
Spike length	fastlmm	NC_012874.2	23513868	4.48556e-10	9.35	A/T	A:328_T:18	0.05
Spike length	fastlmm	NC_012874.2	27514461	4.48556e-10	9.35	C/T	C:330_T:18	0.05
Spike length	fastlmm	NC_012874.2	28148084	4.48556e-10	9.35	C/G	C:326_G:18	0.05
Spike length	fastlmm	NC_012874.2	37686824	4.48556e-10	9.35	A/C	A:330_C:18	0.05
Spike length	fastlmm	NC_012874.2	37840269	4.48556e-10	9.35	T/C	T:330_C:18	0.05
Spike length	fastlmm	NC_012874.2	38054609	4.48556e-10	9.35	G/T	G:330_T:18	0.05
Spike length	fastlmm	NC_012874.2	38096811	4.48556e-10	9.35	G/A	G:328_A:18	0.05
Spike length	fastlmm	NC_012874.2	38249355	4.48556e-10	9.35	G/A	G:332_A:18	0.05
Spike length	fastlmm	NC_012874.2	38889898	4.48556e-10	9.35	G/T	G:330_T:18	0.05
Spike length	fastlmm	NC_012874.2	38934146	4.48556e-10	9.35	G/C	G:330_C:18	0.05
Spike length	fastlmm	NC_012874.2	29099432	4.48648e-10	9.35	A/G	A:330_G:18	0.05
Spike length	fastlmm	NC_012874.2	31824331	4.49465e-10	9.35	C/G	C:340_G:18	0.05
Spike length	fastlmm	NC_012874.2	23222043	4.51243e-10	9.35	G/T	G:336_T:18	0.05
Spike length	fastlmm	NC_012874.2	48175153	4.53547e-10	9.34	A/G	A:326_G:18	0.05
Spike length	fastlmm	NC_012874.2	38173609	4.55966e-10	9.34	G/A	G:326_A:18	0.05
Spike length	fastlmm	NC_012874.2	22492674	4.57853e-10	9.34	T/A	T:330_A:18	0.05
Spike length	fastlmm	NC_012874.2	31580910	4.58446e-10	9.34	C/T	C:326_T:18	0.05
Spike length	fastlmm	NC_012874.2	32061642	4.58714e-10	9.34	T/G	T:330_G:18	0.05
Spike length	fastlmm	NC_012874.2	37731420	4.59603e-10	9.34	G/A	G:334_A:18	0.05
Spike length	fastlmm	NC_012874.2	37791391	4.61883e-10	9.34	G/T	G:330_T:18	0.05
Spike length	fastlmm	NC_012874.2	23428235	4.62647e-10	9.33	G/A	G:330_A:18	0.05
Spike length	fastlmm	NC_012874.2	38858434	4.62647e-10	9.33	G/C	G:328_C:18	0.05
Spike length	fastlmm	NC_012874.2	31825769	4.63092e-10	9.33	G/T	G:328_T:18	0.05
Spike length	fastlmm	NC_012874.2	38791449	4.64438e-10	9.33	C/T	C:328_T:18	0.05
Spike length	fastlmm	NC_012874.2	25854794	4.65797e-10	9.33	C/T	C:328_T:18	0.05
Spike length	fastlmm	NC_012874.2	23481819	4.68046e-10	9.33	C/A	C:326_A:18	0.05
Spike length	fastlmm	NC_012874.2	23446043	4.68585e-10	9.33	G/A	G:328_A:18	0.05
Spike length	fastlmm	NC_012874.2	31007395	4.71647e-10	9.33	G/A	G:330_A:18	0.05
Spike length	fastlmm	NC_012874.2	38943052	4.71757e-10	9.33	C/T	C:332_T:18	0.05
Spike length	fastlmm	NC_012874.2	28752010	4.72796e-10	9.33	C/T	C:328_T:18	0.05
Spike length	fastlmm	NC_012874.2	38938680	4.72825e-10	9.33	G/A	G:334_A:18	0.05
Spike length	fastlmm	NC_012874.2	37969572	4.74636e-10	9.32	G/T	G:326_T:18	0.05
Spike length	fastlmm	NC_012874.2	23471871	4.75228e-10	9.32	G/T	G:328_T:18	0.05
Spike length	fastlmm	NC_012874.2	28236466	4.78627e-10	9.32	A/G	A:326_G:18	0.05
Spike length	fastlmm	NC_012874.2	28232345	4.81077e-10	9.32	G/A	G:332_A:18	0.05
Spike length	fastlmm	NC_012874.2	45824675	4.81515e-10	9.32	G/A	G:338_A:18	0.05
Spike length	fastlmm	NC_012874.2	37786601	4.82045e-10	9.32	G/C	G:328_C:18	0.05
Spike length	fastlmm	NC_012874.2	37827863	4.82329e-10	9.32	C/T	C:332_T:18	0.05
Spike length	fastlmm	NC_012874.2	28021794	4.82493e-10	9.32	T/G	T:334_G:18	0.05
Spike length	fastlmm	NC_012874.2	42414890	4.83659e-10	9.32	C/T	C:336_T:18	0.05
Spike length	fastlmm	NC_012874.2	38190511	4.83969e-10	9.32	C/T	C:326_T:18	0.05
Spike length	fastlmm	NC_012874.2	44740667	4.86942e-10	9.31	A/G	A:332_G:18	0.05
Spike length	fastlmm	NC_012874.2	34800216	4.87261e-10	9.31	G/T	G:330_T:18	0.05
Spike length	fastlmm	NC_012874.2	38826430	4.87261e-10	9.31	C/T	C:332_T:18	0.05
Spike length	fastlmm	NC_012874.2	44930789	4.87261e-10	9.31	C/A	C:332_A:18	0.05
Spike length	fastlmm	NC_012874.2	23423753	4.88226e-10	9.31	C/A	C:336_A:18	0.05
Spike length	fastlmm	NC_012874.2	33515450	4.89215e-10	9.31	T/C	T:336_C:18	0.05
Spike length	fastlmm	NC_012874.2	23477443	4.93343e-10	9.31	T/G	T:326_G:18	0.05
Spike length	fastlmm	NC_012874.2	37725037	4.9366e-10	9.31	A/T	A:326_T:18	0.05
Spike length	fastlmm	NC_012874.2	41612311	4.94916e-10	9.31	C/T	C:326_T:18	0.05
Spike length	fastlmm	NC_012874.2	31232916	4.95125e-10	9.31	C/T	C:328_T:18	0.05
Spike length	fastlmm	NC_012874.2	38045932	4.95143e-10	9.31	G/A	G:332_A:18	0.05
Spike length	fastlmm	NC_012874.2	38046098	4.95143e-10	9.31	C/A	C:330_A:18	0.05
Spike length	fastlmm	NC_012874.2	27380032	4.95516e-10	9.3	G/A	G:328_A:18	0.05
Spike length	fastlmm	NC_012874.2	27659970	4.95516e-10	9.3	G/A	G:330_A:18	0.05
Spike length	fastlmm	NC_012874.2	47900645	4.95516e-10	9.3	A/C	A:332_C:18	0.05
Spike length	fastlmm	NC_012874.2	29418758	4.96236e-10	9.3	A/T	A:332_T:18	0.05
Spike length	fastlmm	NC_012874.2	38058344	4.9829e-10	9.3	C/G	C:326_G:18	0.05
Spike length	fastlmm	NC_012874.2	38132032	4.98824e-10	9.3	C/G	C:336_G:18	0.05
Spike length	fastlmm	NC_012874.2	27379193	5.00057e-10	9.3	G/A	G:332_A:18	0.05
Spike length	fastlmm	NC_012874.2	38759980	5.048e-10	9.3	T/C	T:330_C:18	0.05
Spike length	fastlmm	NC_012874.2	38195050	5.05577e-10	9.3	G/T	G:336_T:18	0.05
Spike length	fastlmm	NC_012874.2	31219421	5.05923e-10	9.3	C/T	C:336_T:18	0.05
Spike length	fastlmm	NC_012874.2	31219427	5.0593e-10	9.3	G/A	G:336_A:18	0.05
Spike length	fastlmm	NC_012874.2	38163167	5.07064e-10	9.29	G/A	G:330_A:18	0.05
Spike length	fastlmm	NC_012874.2	23506670	5.08734e-10	9.29	A/G	A:330_G:18	0.05
Spike length	fastlmm	NC_012874.2	31232976	5.09663e-10	9.29	A/T	A:326_T:18	0.05
Spike length	fastlmm	NC_012874.2	29310499	5.10849e-10	9.29	G/T	G:336_T:18	0.05
Spike length	fastlmm	NC_012874.2	28035858	5.11353e-10	9.29	G/A	G:338_A:18	0.05
Spike length	fastlmm	NC_012874.2	38802844	5.11742e-10	9.29	C/G	C:330_G:18	0.05
Spike length	fastlmm	NC_012874.2	38802878	5.11742e-10	9.29	C/G	C:330_G:18	0.05
Spike length	fastlmm	NC_012874.2	28144800	5.12286e-10	9.29	C/A	C:326_A:18	0.05
Spike length	fastlmm	NC_012874.2	45564650	5.12291e-10	9.29	G/A	G:328_A:18	0.05
Spike length	fastlmm	NC_012874.2	29626188	5.13053e-10	9.29	C/A	C:328_A:18	0.05
Spike length	fastlmm	NC_012874.2	29626155	5.13053e-10	9.29	C/A	C:328_A:18	0.05
Spike length	fastlmm	NC_012874.2	31200394	5.15866e-10	9.29	T/A	T:330_A:18	0.05
Spike length	fastlmm	NC_012874.2	24072957	5.1593e-10	9.29	C/T	C:336_T:18	0.05
Spike length	fastlmm	NC_012874.2	24377030	5.16861e-10	9.29	G/A	G:326_A:18	0.05
Spike length	fastlmm	NC_012874.2	38043083	5.17992e-10	9.29	G/A	G:340_A:18	0.05
Spike length	fastlmm	NC_012870.2	62950749	5.19987e-10	9.28	G/A	G:339_A:19	0.05
Spike length	fastlmm	NC_012874.2	23474179	5.21046e-10	9.28	G/A	G:326_A:18	0.05
Spike length	fastlmm	NC_012874.2	28693285	5.21046e-10	9.28	G/T	G:326_T:18	0.05
Spike length	fastlmm	NC_012874.2	38026847	5.22634e-10	9.28	G/T	G:332_T:18	0.05
Spike length	fastlmm	NC_012874.2	23469378	5.24266e-10	9.28	G/A	G:326_A:18	0.05
Spike length	fastlmm	NC_012874.2	37838486	5.24266e-10	9.28	C/T	C:328_T:18	0.05
Spike length	fastlmm	NC_012874.2	38910802	5.25679e-10	9.28	A/T	A:328_T:18	0.05
Spike length	fastlmm	NC_012874.2	23475849	5.25767e-10	9.28	C/T	C:330_T:18	0.05
Spike length	fastlmm	NC_012874.2	23459081	5.25767e-10	9.28	A/C	A:332_C:18	0.05
Spike length	fastlmm	NC_012874.2	38217277	5.26475e-10	9.28	A/G	A:330_G:18	0.05
Spike length	fastlmm	NC_012874.2	28695175	5.26688e-10	9.28	C/T	C:336_T:18	0.05
Spike length	fastlmm	NC_012874.2	31184972	5.28169e-10	9.28	G/C	G:328_C:18	0.05
Spike length	fastlmm	NC_012874.2	31194786	5.28169e-10	9.28	A/T	A:326_T:18	0.05
Spike length	fastlmm	NC_012874.2	25836248	5.28169e-10	9.28	C/T	C:326_T:18	0.05
Spike length	fastlmm	NC_012874.2	29457749	5.29236e-10	9.28	G/A	G:334_A:18	0.05
Spike length	fastlmm	NC_012874.2	33315170	5.29412e-10	9.28	G/A	G:336_A:18	0.05
Spike length	fastlmm	NC_012874.2	29099497	5.29565e-10	9.28	G/C	G:328_C:18	0.05
Spike length	fastlmm	NC_012874.2	29099766	5.29565e-10	9.28	T/C	T:326_C:18	0.05
Spike length	fastlmm	NC_012874.2	25207906	5.30209e-10	9.28	G/A	G:328_A:18	0.05
Spike length	fastlmm	NC_012874.2	37976355	5.32662e-10	9.27	C/G	C:330_G:18	0.05
Spike length	fastlmm	NC_012874.2	38934757	5.32662e-10	9.27	G/A	G:328_A:18	0.05
Spike length	fastlmm	NC_012874.2	29251220	5.32818e-10	9.27	G/C	G:326_C:18	0.05
Spike length	fastlmm	NC_012874.2	38763966	5.32818e-10	9.27	C/T	C:326_T:18	0.05
Spike length	fastlmm	NC_012874.2	22287809	5.3394e-10	9.27	A/G	A:330_G:18	0.05
Spike length	fastlmm	NC_012874.2	23433477	5.3394e-10	9.27	C/T	C:330_T:18	0.05
Spike length	fastlmm	NC_012874.2	23440670	5.3394e-10	9.27	C/T	C:330_T:18	0.05
Spike length	fastlmm	NC_012874.2	23443631	5.3394e-10	9.27	G/A	G:330_A:18	0.05
Spike length	fastlmm	NC_012874.2	23471712	5.3394e-10	9.27	G/A	G:332_A:18	0.05
Spike length	fastlmm	NC_012874.2	23499779	5.3394e-10	9.27	G/A	G:328_A:18	0.05
Spike length	fastlmm	NC_012874.2	29509563	5.3394e-10	9.27	C/T	C:330_T:18	0.05
Spike length	fastlmm	NC_012874.2	31309318	5.3394e-10	9.27	G/A	G:332_A:18	0.05
Spike length	fastlmm	NC_012874.2	34803810	5.3394e-10	9.27	T/C	T:328_C:18	0.05
Spike length	fastlmm	NC_012874.2	37692254	5.3394e-10	9.27	G/A	G:330_A:18	0.05
Spike length	fastlmm	NC_012874.2	38192526	5.3394e-10	9.27	G/A	G:328_A:18	0.05
Spike length	fastlmm	NC_012874.2	38931417	5.3394e-10	9.27	A/T	A:330_T:18	0.05
Spike length	fastlmm	NC_012874.2	38936913	5.3394e-10	9.27	G/A	G:328_A:18	0.05
Spike length	fastlmm	NC_012874.2	44838955	5.3394e-10	9.27	T/A	T:332_A:18	0.05
Spike length	fastlmm	NC_012874.2	44839149	5.3394e-10	9.27	C/T	C:328_T:18	0.05
Spike length	fastlmm	NC_012874.2	38165331	5.35155e-10	9.27	G/A	G:328_A:18	0.05
Spike length	fastlmm	NC_012874.2	31216262	5.36825e-10	9.27	G/A	G:330_A:18	0.05
Spike length	fastlmm	NC_012874.2	28688115	5.38551e-10	9.27	G/A	G:326_A:18	0.05
Spike length	fastlmm	NC_012874.2	30239426	5.38834e-10	9.27	G/A	G:326_A:18	0.05
Spike length	fastlmm	NC_012874.2	38195069	5.3921e-10	9.27	G/T	G:338_T:18	0.05
Spike length	fastlmm	NC_012874.2	40440277	5.39295e-10	9.27	G/A	G:330_A:18	0.05
Spike length	fastlmm	NC_012874.2	38171124	5.3987e-10	9.27	C/T	C:332_T:18	0.05
Spike length	fastlmm	NC_012874.2	37681307	5.4021e-10	9.27	C/A	C:336_A:18	0.05
Spike length	fastlmm	NC_012874.2	22336460	5.40334e-10	9.27	T/A	T:326_A:18	0.05
Spike length	fastlmm	NC_012874.2	28149498	5.45511e-10	9.26	G/C	G:326_C:18	0.05
Spike length	fastlmm	NC_012874.2	40446548	5.47037e-10	9.26	G/T	G:328_T:18	0.05
Spike length	fastlmm	NC_012874.2	30738767	5.47037e-10	9.26	T/G	T:326_G:18	0.05
Spike length	fastlmm	NC_012874.2	31050345	5.47037e-10	9.26	A/T	A:326_T:18	0.05
Spike length	fastlmm	NC_012874.2	37825416	5.48678e-10	9.26	C/T	C:340_T:18	0.05
Spike length	fastlmm	NC_012874.2	23465059	5.53454e-10	9.26	G/T	G:326_T:18	0.05
Spike length	fastlmm	NC_012874.2	38202359	5.53454e-10	9.26	G/T	G:326_T:18	0.05
Spike length	fastlmm	NC_012874.2	38799990	5.53454e-10	9.26	G/A	G:326_A:18	0.05
Spike length	fastlmm	NC_012874.2	45854469	5.53454e-10	9.26	T/G	T:328_G:18	0.05
Spike length	fastlmm	NC_012874.2	47900681	5.53454e-10	9.26	A/G	A:326_G:18	0.05
Spike length	fastlmm	NC_012874.2	33481136	5.53454e-10	9.26	C/T	C:328_T:18	0.05
Spike length	fastlmm	NC_012874.2	34151621	5.53454e-10	9.26	C/T	C:326_T:18	0.05
Spike length	fastlmm	NC_012874.2	38197068	5.53454e-10	9.26	A/T	A:328_T:18	0.05
Spike length	fastlmm	NC_012874.2	38202308	5.53454e-10	9.26	G/A	G:326_A:18	0.05
Spike length	fastlmm	NC_012874.2	31309659	5.53883e-10	9.26	G/A	G:326_A:18	0.05
Spike length	fastlmm	NC_012874.2	38785126	5.55794e-10	9.26	G/A	G:330_A:18	0.05
Spike length	fastlmm	NC_012874.2	31225342	5.56922e-10	9.25	A/G	A:328_G:18	0.05
Spike length	fastlmm	NC_012874.2	23468764	5.5826e-10	9.25	G/A	G:328_A:18	0.05
Spike length	fastlmm	NC_012874.2	29493708	5.58417e-10	9.25	G/A	G:326_A:18	0.05
Spike length	fastlmm	NC_012874.2	37706069	5.58925e-10	9.25	C/T	C:326_T:18	0.05
Spike length	fastlmm	NC_012874.2	29318099	5.60478e-10	9.25	C/T	C:328_T:18	0.05
Spike length	fastlmm	NC_012874.2	28030577	5.61543e-10	9.25	C/A	C:334_A:18	0.05
Spike length	fastlmm	NC_012874.2	38133984	5.64466e-10	9.25	A/G	A:326_G:18	0.05
Spike length	fastlmm	NC_012874.2	30002764	5.64977e-10	9.25	C/G	C:326_G:18	0.05
Spike length	fastlmm	NC_012874.2	30383515	5.65523e-10	9.25	T/A	T:328_A:18	0.05
Spike length	fastlmm	NC_012874.2	38042715	5.65711e-10	9.25	C/T	C:336_T:18	0.05
Spike length	fastlmm	NC_012874.2	43861518	5.65895e-10	9.25	T/C	T:328_C:18	0.05
Spike length	fastlmm	NC_012874.2	37679199	5.6594e-10	9.25	C/T	C:326_T:18	0.05
Spike length	fastlmm	NC_012874.2	45925651	5.67715e-10	9.25	G/A	G:338_A:18	0.05
Spike length	fastlmm	NC_012874.2	38079969	5.68515e-10	9.25	G/A	G:328_A:18	0.05
Spike length	fastlmm	NC_012874.2	31244311	5.68534e-10	9.25	A/G	A:334_G:18	0.05
Spike length	fastlmm	NC_012874.2	22337552	5.69586e-10	9.24	C/A	C:326_A:18	0.05
Spike length	fastlmm	NC_012874.2	23476420	5.69586e-10	9.24	C/T	C:326_T:18	0.05
Spike length	fastlmm	NC_012874.2	23478105	5.69586e-10	9.24	A/G	A:328_G:18	0.05
Spike length	fastlmm	NC_012874.2	23510862	5.69586e-10	9.24	A/C	A:328_C:18	0.05
Spike length	fastlmm	NC_012874.2	24073176	5.69586e-10	9.24	G/A	G:326_A:18	0.05
Spike length	fastlmm	NC_012874.2	28143673	5.69586e-10	9.24	G/A	G:326_A:18	0.05
Spike length	fastlmm	NC_012874.2	29491363	5.69586e-10	9.24	G/A	G:328_A:18	0.05
Spike length	fastlmm	NC_012874.2	29627097	5.69586e-10	9.24	A/T	A:328_T:18	0.05
Spike length	fastlmm	NC_012874.2	30986414	5.69586e-10	9.24	T/A	T:326_A:18	0.05
Spike length	fastlmm	NC_012874.2	30987098	5.69586e-10	9.24	A/G	A:326_G:18	0.05
Spike length	fastlmm	NC_012874.2	30990943	5.69586e-10	9.24	T/C	T:328_C:18	0.05
Spike length	fastlmm	NC_012874.2	30990975	5.69586e-10	9.24	A/T	A:328_T:18	0.05
Spike length	fastlmm	NC_012874.2	31202342	5.69586e-10	9.24	C/T	C:328_T:18	0.05
Spike length	fastlmm	NC_012874.2	31320246	5.69586e-10	9.24	G/C	G:328_C:18	0.05
Spike length	fastlmm	NC_012874.2	31804588	5.69586e-10	9.24	C/T	C:328_T:18	0.05
Spike length	fastlmm	NC_012874.2	32062481	5.69586e-10	9.24	G/A	G:326_A:18	0.05
Spike length	fastlmm	NC_012874.2	32340895	5.69586e-10	9.24	T/A	T:326_A:18	0.05
Spike length	fastlmm	NC_012874.2	33467409	5.69586e-10	9.24	G/A	G:328_A:18	0.05
Spike length	fastlmm	NC_012874.2	37677317	5.69586e-10	9.24	C/T	C:328_T:18	0.05
Spike length	fastlmm	NC_012874.2	37677780	5.69586e-10	9.24	A/C	A:326_C:18	0.05
Spike length	fastlmm	NC_012874.2	37677890	5.69586e-10	9.24	T/A	T:326_A:18	0.05
Spike length	fastlmm	NC_012874.2	37677998	5.69586e-10	9.24	G/T	G:326_T:18	0.05
Spike length	fastlmm	NC_012874.2	37678769	5.69586e-10	9.24	A/G	A:328_G:18	0.05
Spike length	fastlmm	NC_012874.2	37679236	5.69586e-10	9.24	G/A	G:328_A:18	0.05
Spike length	fastlmm	NC_012874.2	37679531	5.69586e-10	9.24	G/A	G:326_A:18	0.05
Spike length	fastlmm	NC_012874.2	37680365	5.69586e-10	9.24	C/A	C:328_A:18	0.05
Spike length	fastlmm	NC_012874.2	37680398	5.69586e-10	9.24	A/G	A:328_G:18	0.05
Spike length	fastlmm	NC_012874.2	37680567	5.69586e-10	9.24	T/A	T:326_A:18	0.05
Spike length	fastlmm	NC_012874.2	37681092	5.69586e-10	9.24	G/A	G:326_A:18	0.05
Spike length	fastlmm	NC_012874.2	37681188	5.69586e-10	9.24	T/C	T:328_C:18	0.05
Spike length	fastlmm	NC_012874.2	37682513	5.69586e-10	9.24	T/C	T:326_C:18	0.05
Spike length	fastlmm	NC_012874.2	37693161	5.69586e-10	9.24	G/C	G:326_C:18	0.05
Spike length	fastlmm	NC_012874.2	37785525	5.69586e-10	9.24	G/A	G:328_A:18	0.05
Spike length	fastlmm	NC_012874.2	37789948	5.69586e-10	9.24	T/G	T:326_G:18	0.05
Spike length	fastlmm	NC_012874.2	37998383	5.69586e-10	9.24	A/G	A:326_G:18	0.05
Spike length	fastlmm	NC_012874.2	38002686	5.69586e-10	9.24	C/T	C:326_T:18	0.05
Spike length	fastlmm	NC_012874.2	38002747	5.69586e-10	9.24	C/A	C:326_A:18	0.05
Spike length	fastlmm	NC_012874.2	38002769	5.69586e-10	9.24	A/G	A:326_G:18	0.05
Spike length	fastlmm	NC_012874.2	38003300	5.69586e-10	9.24	G/A	G:326_A:18	0.05
Spike length	fastlmm	NC_012874.2	38003367	5.69586e-10	9.24	A/G	A:326_G:18	0.05
Spike length	fastlmm	NC_012874.2	38003480	5.69586e-10	9.24	A/G	A:326_G:18	0.05
Spike length	fastlmm	NC_012874.2	38003630	5.69586e-10	9.24	G/T	G:326_T:18	0.05
Spike length	fastlmm	NC_012874.2	38050918	5.69586e-10	9.24	A/C	A:326_C:18	0.05
Spike length	fastlmm	NC_012874.2	38122611	5.69586e-10	9.24	C/T	C:326_T:18	0.05
Spike length	fastlmm	NC_012874.2	38230127	5.69586e-10	9.24	G/A	G:326_A:18	0.05
Spike length	fastlmm	NC_012874.2	38248186	5.69586e-10	9.24	G/A	G:328_A:18	0.05
Spike length	fastlmm	NC_012874.2	38762322	5.69586e-10	9.24	G/A	G:328_A:18	0.05
Spike length	fastlmm	NC_012874.2	38768731	5.69586e-10	9.24	C/T	C:326_T:18	0.05
Spike length	fastlmm	NC_012874.2	38815454	5.69586e-10	9.24	C/A	C:326_A:18	0.05
Spike length	fastlmm	NC_012874.2	38817158	5.69586e-10	9.24	C/T	C:326_T:18	0.05
Spike length	fastlmm	NC_012874.2	38915580	5.69586e-10	9.24	G/C	G:326_C:18	0.05
Spike length	fastlmm	NC_012874.2	42409023	5.69586e-10	9.24	T/G	T:326_G:18	0.05
Spike length	fastlmm	NC_012874.2	42410263	5.69586e-10	9.24	G/A	G:326_A:18	0.05
Spike length	fastlmm	NC_012874.2	42411169	5.69586e-10	9.24	G/A	G:326_A:18	0.05
Spike length	fastlmm	NC_012874.2	42412050	5.69586e-10	9.24	C/A	C:326_A:18	0.05
Spike length	fastlmm	NC_012874.2	42413779	5.69586e-10	9.24	G/T	G:326_T:18	0.05
Spike length	fastlmm	NC_012874.2	43863828	5.69586e-10	9.24	G/A	G:326_A:18	0.05
Spike length	fastlmm	NC_012874.2	45814147	5.69586e-10	9.24	T/G	T:326_G:18	0.05
Spike length	fastlmm	NC_012874.2	45795220	5.69667e-10	9.24	G/T	G:330_T:18	0.05
Spike length	fastlmm	NC_012874.2	31232373	5.70939e-10	9.24	C/T	C:330_T:18	0.05
Spike length	fastlmm	NC_012874.2	31256572	5.70939e-10	9.24	C/T	C:332_T:18	0.05
Spike length	fastlmm	NC_012874.2	38246549	5.70939e-10	9.24	C/T	C:332_T:18	0.05
Spike length	fastlmm	NC_012874.2	28688462	5.71768e-10	9.24	G/T	G:332_T:18	0.05
Spike length	fastlmm	NC_012874.2	23435937	5.71927e-10	9.24	G/C	G:326_C:18	0.05
Spike length	fastlmm	NC_012874.2	26457088	5.71927e-10	9.24	C/T	C:328_T:18	0.05
Spike length	fastlmm	NC_012874.2	38045058	5.71946e-10	9.24	G/A	G:328_A:18	0.05
Spike length	fastlmm	NC_012874.2	37789565	5.71946e-10	9.24	C/T	C:326_T:18	0.05
Spike length	fastlmm	NC_012874.2	43937793	5.72013e-10	9.24	A/G	A:342_G:18	0.05
Spike length	fastlmm	NC_012874.2	22290002	5.72844e-10	9.24	A/G	A:330_G:18	0.05
Spike length	fastlmm	NC_012874.2	22290026	5.72844e-10	9.24	C/A	C:328_A:18	0.05
Spike length	fastlmm	NC_012874.2	38778363	5.72986e-10	9.24	G/A	G:328_A:18	0.05
Spike length	fastlmm	NC_012874.2	29459063	5.73014e-10	9.24	G/A	G:330_A:18	0.05
Spike length	fastlmm	NC_012874.2	30984654	5.73014e-10	9.24	G/T	G:330_T:18	0.05
Spike length	fastlmm	NC_012874.2	37878180	5.73014e-10	9.24	G/A	G:328_A:18	0.05
Spike length	fastlmm	NC_012874.2	38945502	5.76181e-10	9.24	T/A	T:330_A:18	0.05
Spike length	fastlmm	NC_012874.2	25244882	5.77658e-10	9.24	G/A	G:330_A:18	0.05
Spike length	fastlmm	NC_012874.2	29465683	5.79059e-10	9.24	G/A	G:330_A:18	0.05
Spike length	fastlmm	NC_012874.2	38753236	5.79059e-10	9.24	T/A	T:332_A:18	0.05
Spike length	fastlmm	NC_012874.2	38933594	5.79059e-10	9.24	A/T	A:330_T:18	0.05
Spike length	fastlmm	NC_012874.2	38961009	5.79155e-10	9.24	G/A	G:328_A:18	0.05
Spike length	fastlmm	NC_012874.2	25200785	5.80658e-10	9.24	G/A	G:326_A:18	0.05
Spike length	fastlmm	NC_012874.2	26917905	5.80658e-10	9.24	A/T	A:326_T:18	0.05
Spike length	fastlmm	NC_012874.2	45795019	5.81022e-10	9.24	G/A	G:328_A:18	0.05
Spike length	fastlmm	NC_012874.2	31079107	5.8105e-10	9.24	T/C	T:326_C:18	0.05
Spike length	fastlmm	NC_012874.2	31193441	5.81508e-10	9.24	A/C	A:330_C:18	0.05
Spike length	fastlmm	NC_012874.2	31264433	5.81595e-10	9.24	C/G	C:334_G:18	0.05
Spike length	fastlmm	NC_012874.2	29456107	5.84046e-10	9.23	G/A	G:332_A:18	0.05
Spike length	fastlmm	NC_012874.2	21093169	5.84131e-10	9.23	G/A	G:326_A:18	0.05
Spike length	fastlmm	NC_012874.2	21535776	5.84131e-10	9.23	C/T	C:326_T:18	0.05
Spike length	fastlmm	NC_012874.2	21838312	5.84131e-10	9.23	A/C	A:326_C:18	0.05
Spike length	fastlmm	NC_012874.2	22287746	5.84131e-10	9.23	G/A	G:326_A:18	0.05
Spike length	fastlmm	NC_012874.2	22292320	5.84131e-10	9.23	G/A	G:330_A:18	0.05
Spike length	fastlmm	NC_012874.2	22334095	5.84131e-10	9.23	C/T	C:330_T:18	0.05
Spike length	fastlmm	NC_012874.2	22334104	5.84131e-10	9.23	C/T	C:330_T:18	0.05
Spike length	fastlmm	NC_012874.2	22334114	5.84131e-10	9.23	G/A	G:330_A:18	0.05
Spike length	fastlmm	NC_012874.2	22334450	5.84131e-10	9.23	C/T	C:328_T:18	0.05
Spike length	fastlmm	NC_012874.2	22335352	5.84131e-10	9.23	G/C	G:328_C:18	0.05
Spike length	fastlmm	NC_012874.2	22335505	5.84131e-10	9.23	G/A	G:328_A:18	0.05
Spike length	fastlmm	NC_012874.2	22336077	5.84131e-10	9.23	G/A	G:328_A:18	0.05
Spike length	fastlmm	NC_012874.2	22336104	5.84131e-10	9.23	C/G	C:328_G:18	0.05
Spike length	fastlmm	NC_012874.2	22336338	5.84131e-10	9.23	C/T	C:328_T:18	0.05
Spike length	fastlmm	NC_012874.2	22336664	5.84131e-10	9.23	T/A	T:328_A:18	0.05
Spike length	fastlmm	NC_012874.2	22336977	5.84131e-10	9.23	C/A	C:330_A:18	0.05
Spike length	fastlmm	NC_012874.2	22337225	5.84131e-10	9.23	G/C	G:330_C:18	0.05
Spike length	fastlmm	NC_012874.2	22337308	5.84131e-10	9.23	G/A	G:328_A:18	0.05
Spike length	fastlmm	NC_012874.2	22337339	5.84131e-10	9.23	C/T	C:328_T:18	0.05
Spike length	fastlmm	NC_012874.2	22337728	5.84131e-10	9.23	C/T	C:326_T:18	0.05
Spike length	fastlmm	NC_012874.2	22407949	5.84131e-10	9.23	T/A	T:328_A:18	0.05
Spike length	fastlmm	NC_012874.2	22408654	5.84131e-10	9.23	G/T	G:328_T:18	0.05
Spike length	fastlmm	NC_012874.2	22408984	5.84131e-10	9.23	G/A	G:328_A:18	0.05
Spike length	fastlmm	NC_012874.2	22409115	5.84131e-10	9.23	G/A	G:330_A:18	0.05
Spike length	fastlmm	NC_012874.2	22409186	5.84131e-10	9.23	C/T	C:328_T:18	0.05
Spike length	fastlmm	NC_012874.2	22409570	5.84131e-10	9.23	G/T	G:330_T:18	0.05
Spike length	fastlmm	NC_012874.2	23423085	5.84131e-10	9.23	C/T	C:328_T:18	0.05
Spike length	fastlmm	NC_012874.2	23423398	5.84131e-10	9.23	G/T	G:330_T:18	0.05
Spike length	fastlmm	NC_012874.2	23423409	5.84131e-10	9.23	C/T	C:330_T:18	0.05
Spike length	fastlmm	NC_012874.2	23425345	5.84131e-10	9.23	G/A	G:330_A:18	0.05
Spike length	fastlmm	NC_012874.2	23426759	5.84131e-10	9.23	G/A	G:328_A:18	0.05
Spike length	fastlmm	NC_012874.2	23438532	5.84131e-10	9.23	C/T	C:330_T:18	0.05
Spike length	fastlmm	NC_012874.2	23439839	5.84131e-10	9.23	G/A	G:330_A:18	0.05
Spike length	fastlmm	NC_012874.2	23439851	5.84131e-10	9.23	G/A	G:330_A:18	0.05
Spike length	fastlmm	NC_012874.2	23440031	5.84131e-10	9.23	G/A	G:328_A:18	0.05
Spike length	fastlmm	NC_012874.2	23441637	5.84131e-10	9.23	G/A	G:326_A:18	0.05
Spike length	fastlmm	NC_012874.2	23441765	5.84131e-10	9.23	T/C	T:326_C:18	0.05
Spike length	fastlmm	NC_012874.2	23442651	5.84131e-10	9.23	A/G	A:328_G:18	0.05
Spike length	fastlmm	NC_012874.2	23446017	5.84131e-10	9.23	C/T	C:326_T:18	0.05
Spike length	fastlmm	NC_012874.2	23447691	5.84131e-10	9.23	G/C	G:328_C:18	0.05
Spike length	fastlmm	NC_012874.2	23453359	5.84131e-10	9.23	G/T	G:330_T:18	0.05
Spike length	fastlmm	NC_012874.2	23455051	5.84131e-10	9.23	G/A	G:328_A:18	0.05
Spike length	fastlmm	NC_012874.2	23457096	5.84131e-10	9.23	T/G	T:326_G:18	0.05
Spike length	fastlmm	NC_012874.2	23457243	5.84131e-10	9.23	T/C	T:326_C:18	0.05
Spike length	fastlmm	NC_012874.2	23457327	5.84131e-10	9.23	G/C	G:330_C:18	0.05
Spike length	fastlmm	NC_012874.2	23458020	5.84131e-10	9.23	C/T	C:330_T:18	0.05
Spike length	fastlmm	NC_012874.2	23458033	5.84131e-10	9.23	T/A	T:328_A:18	0.05
Spike length	fastlmm	NC_012874.2	23458283	5.84131e-10	9.23	G/A	G:330_A:18	0.05
Spike length	fastlmm	NC_012874.2	23460104	5.84131e-10	9.23	C/T	C:328_T:18	0.05
Spike length	fastlmm	NC_012874.2	23460339	5.84131e-10	9.23	C/T	C:328_T:18	0.05
Spike length	fastlmm	NC_012874.2	23462215	5.84131e-10	9.23	G/A	G:330_A:18	0.05
Spike length	fastlmm	NC_012874.2	23463126	5.84131e-10	9.23	G/C	G:326_C:18	0.05
Spike length	fastlmm	NC_012874.2	23464490	5.84131e-10	9.23	A/G	A:328_G:18	0.05
Spike length	fastlmm	NC_012874.2	23464772	5.84131e-10	9.23	G/A	G:328_A:18	0.05
Spike length	fastlmm	NC_012874.2	23465011	5.84131e-10	9.23	C/G	C:330_G:18	0.05
Spike length	fastlmm	NC_012874.2	23465202	5.84131e-10	9.23	C/T	C:328_T:18	0.05
Spike length	fastlmm	NC_012874.2	23467473	5.84131e-10	9.23	C/T	C:326_T:18	0.05
Spike length	fastlmm	NC_012874.2	23467982	5.84131e-10	9.23	G/T	G:330_T:18	0.05
Spike length	fastlmm	NC_012874.2	23469350	5.84131e-10	9.23	T/G	T:328_G:18	0.05
Spike length	fastlmm	NC_012874.2	23469443	5.84131e-10	9.23	C/T	C:328_T:18	0.05
Spike length	fastlmm	NC_012874.2	23469921	5.84131e-10	9.23	G/T	G:328_T:18	0.05
Spike length	fastlmm	NC_012874.2	23469974	5.84131e-10	9.23	C/A	C:328_A:18	0.05
Spike length	fastlmm	NC_012874.2	23473089	5.84131e-10	9.23	G/A	G:326_A:18	0.05
Spike length	fastlmm	NC_012874.2	23474186	5.84131e-10	9.23	T/G	T:328_G:18	0.05
Spike length	fastlmm	NC_012874.2	23475765	5.84131e-10	9.23	C/T	C:326_T:18	0.05
Spike length	fastlmm	NC_012874.2	23476382	5.84131e-10	9.23	C/T	C:330_T:18	0.05
Spike length	fastlmm	NC_012874.2	23478392	5.84131e-10	9.23	C/T	C:328_T:18	0.05
Spike length	fastlmm	NC_012874.2	23479921	5.84131e-10	9.23	T/C	T:326_C:18	0.05
Spike length	fastlmm	NC_012874.2	23480773	5.84131e-10	9.23	A/C	A:328_C:18	0.05
Spike length	fastlmm	NC_012874.2	23480975	5.84131e-10	9.23	T/C	T:328_C:18	0.05
Spike length	fastlmm	NC_012874.2	23482144	5.84131e-10	9.23	G/T	G:330_T:18	0.05
Spike length	fastlmm	NC_012874.2	23483041	5.84131e-10	9.23	A/G	A:328_G:18	0.05
Spike length	fastlmm	NC_012874.2	23483332	5.84131e-10	9.23	C/A	C:328_A:18	0.05
Spike length	fastlmm	NC_012874.2	23490926	5.84131e-10	9.23	T/A	T:328_A:18	0.05
Spike length	fastlmm	NC_012874.2	23496889	5.84131e-10	9.23	A/T	A:326_T:18	0.05
Spike length	fastlmm	NC_012874.2	23502049	5.84131e-10	9.23	T/C	T:326_C:18	0.05
Spike length	fastlmm	NC_012874.2	23502174	5.84131e-10	9.23	A/G	A:330_G:18	0.05
Spike length	fastlmm	NC_012874.2	23513614	5.84131e-10	9.23	G/A	G:328_A:18	0.05
Spike length	fastlmm	NC_012874.2	23513668	5.84131e-10	9.23	A/T	A:326_T:18	0.05
Spike length	fastlmm	NC_012874.2	23941536	5.84131e-10	9.23	C/A	C:326_A:18	0.05
Spike length	fastlmm	NC_012874.2	23941551	5.84131e-10	9.23	G/A	G:328_A:18	0.05
Spike length	fastlmm	NC_012874.2	23941559	5.84131e-10	9.23	C/T	C:328_T:18	0.05
Spike length	fastlmm	NC_012874.2	23943759	5.84131e-10	9.23	G/A	G:328_A:18	0.05
Spike length	fastlmm	NC_012874.2	24007191	5.84131e-10	9.23	C/T	C:326_T:18	0.05
Spike length	fastlmm	NC_012874.2	24075161	5.84131e-10	9.23	G/A	G:326_A:18	0.05
Spike length	fastlmm	NC_012874.2	24078118	5.84131e-10	9.23	A/G	A:326_G:18	0.05
Spike length	fastlmm	NC_012874.2	24078141	5.84131e-10	9.23	G/A	G:328_A:18	0.05
Spike length	fastlmm	NC_012874.2	25286866	5.84131e-10	9.23	C/T	C:328_T:18	0.05
Spike length	fastlmm	NC_012874.2	25850289	5.84131e-10	9.23	T/A	T:328_A:18	0.05
Spike length	fastlmm	NC_012874.2	25852073	5.84131e-10	9.23	C/T	C:326_T:18	0.05
Spike length	fastlmm	NC_012874.2	27379380	5.84131e-10	9.23	C/A	C:326_A:18	0.05
Spike length	fastlmm	NC_012874.2	27390850	5.84131e-10	9.23	G/A	G:326_A:18	0.05
Spike length	fastlmm	NC_012874.2	27511686	5.84131e-10	9.23	T/C	T:328_C:18	0.05
Spike length	fastlmm	NC_012874.2	27602572	5.84131e-10	9.23	G/A	G:328_A:18	0.05
Spike length	fastlmm	NC_012874.2	28035533	5.84131e-10	9.23	C/T	C:328_T:18	0.05
Spike length	fastlmm	NC_012874.2	28050989	5.84131e-10	9.23	C/A	C:328_A:18	0.05
Spike length	fastlmm	NC_012874.2	28141140	5.84131e-10	9.23	C/T	C:328_T:18	0.05
Spike length	fastlmm	NC_012874.2	28141292	5.84131e-10	9.23	G/A	G:328_A:18	0.05
Spike length	fastlmm	NC_012874.2	28141954	5.84131e-10	9.23	G/A	G:330_A:18	0.05
Spike length	fastlmm	NC_012874.2	28144349	5.84131e-10	9.23	T/G	T:330_G:18	0.05
Spike length	fastlmm	NC_012874.2	28148295	5.84131e-10	9.23	G/A	G:326_A:18	0.05
Spike length	fastlmm	NC_012874.2	28149158	5.84131e-10	9.23	G/A	G:326_A:18	0.05
Spike length	fastlmm	NC_012874.2	28149923	5.84131e-10	9.23	A/G	A:328_G:18	0.05
Spike length	fastlmm	NC_012874.2	28157452	5.84131e-10	9.23	C/A	C:328_A:18	0.05
Spike length	fastlmm	NC_012874.2	28158166	5.84131e-10	9.23	G/A	G:326_A:18	0.05
Spike length	fastlmm	NC_012874.2	28158180	5.84131e-10	9.23	A/T	A:326_T:18	0.05
Spike length	fastlmm	NC_012874.2	28158729	5.84131e-10	9.23	T/A	T:326_A:18	0.05
Spike length	fastlmm	NC_012874.2	28158879	5.84131e-10	9.23	C/T	C:330_T:18	0.05
Spike length	fastlmm	NC_012874.2	28231214	5.84131e-10	9.23	T/C	T:328_C:18	0.05
Spike length	fastlmm	NC_012874.2	28232993	5.84131e-10	9.23	G/A	G:326_A:18	0.05
Spike length	fastlmm	NC_012874.2	28233141	5.84131e-10	9.23	C/T	C:326_T:18	0.05
Spike length	fastlmm	NC_012874.2	28233178	5.84131e-10	9.23	C/G	C:326_G:18	0.05
Spike length	fastlmm	NC_012874.2	28233200	5.84131e-10	9.23	A/T	A:326_T:18	0.05
Spike length	fastlmm	NC_012874.2	28581997	5.84131e-10	9.23	G/C	G:326_C:18	0.05
Spike length	fastlmm	NC_012874.2	28582733	5.84131e-10	9.23	C/A	C:326_A:18	0.05
Spike length	fastlmm	NC_012874.2	28586844	5.84131e-10	9.23	G/T	G:326_T:18	0.05
Spike length	fastlmm	NC_012874.2	28586930	5.84131e-10	9.23	G/A	G:326_A:18	0.05
Spike length	fastlmm	NC_012874.2	28679998	5.84131e-10	9.23	G/A	G:328_A:18	0.05
Spike length	fastlmm	NC_012874.2	28680877	5.84131e-10	9.23	C/G	C:326_G:18	0.05
Spike length	fastlmm	NC_012874.2	28682864	5.84131e-10	9.23	C/T	C:328_T:18	0.05
Spike length	fastlmm	NC_012874.2	28683999	5.84131e-10	9.23	C/T	C:330_T:18	0.05
Spike length	fastlmm	NC_012874.2	28684612	5.84131e-10	9.23	G/T	G:330_T:18	0.05
Spike length	fastlmm	NC_012874.2	28685656	5.84131e-10	9.23	C/A	C:326_A:18	0.05
Spike length	fastlmm	NC_012874.2	28686564	5.84131e-10	9.23	C/T	C:326_T:18	0.05
Spike length	fastlmm	NC_012874.2	28686944	5.84131e-10	9.23	C/T	C:328_T:18	0.05
Spike length	fastlmm	NC_012874.2	28687373	5.84131e-10	9.23	T/G	T:328_G:18	0.05
Spike length	fastlmm	NC_012874.2	28690487	5.84131e-10	9.23	G/A	G:330_A:18	0.05
Spike length	fastlmm	NC_012874.2	28692409	5.84131e-10	9.23	G/T	G:330_T:18	0.05
Spike length	fastlmm	NC_012874.2	28694105	5.84131e-10	9.23	G/C	G:328_C:18	0.05
Spike length	fastlmm	NC_012874.2	28745229	5.84131e-10	9.23	T/G	T:328_G:18	0.05
Spike length	fastlmm	NC_012874.2	28747583	5.84131e-10	9.23	G/T	G:326_T:18	0.05
Spike length	fastlmm	NC_012874.2	28748898	5.84131e-10	9.23	G/T	G:328_T:18	0.05
Spike length	fastlmm	NC_012874.2	28748965	5.84131e-10	9.23	A/G	A:328_G:18	0.05
Spike length	fastlmm	NC_012874.2	28751253	5.84131e-10	9.23	C/T	C:326_T:18	0.05
Spike length	fastlmm	NC_012874.2	28751663	5.84131e-10	9.23	A/G	A:330_G:18	0.05
Spike length	fastlmm	NC_012874.2	28752198	5.84131e-10	9.23	C/T	C:330_T:18	0.05
Spike length	fastlmm	NC_012874.2	28756079	5.84131e-10	9.23	T/C	T:326_C:18	0.05
Spike length	fastlmm	NC_012874.2	28757447	5.84131e-10	9.23	T/C	T:326_C:18	0.05
Spike length	fastlmm	NC_012874.2	28760204	5.84131e-10	9.23	G/A	G:326_A:18	0.05
Spike length	fastlmm	NC_012874.2	28761545	5.84131e-10	9.23	A/C	A:328_C:18	0.05
Spike length	fastlmm	NC_012874.2	28763404	5.84131e-10	9.23	C/T	C:326_T:18	0.05
Spike length	fastlmm	NC_012874.2	28943243	5.84131e-10	9.23	C/G	C:330_G:18	0.05
Spike length	fastlmm	NC_012874.2	28954055	5.84131e-10	9.23	T/A	T:328_A:18	0.05
Spike length	fastlmm	NC_012874.2	29242028	5.84131e-10	9.23	G/C	G:326_C:18	0.05
Spike length	fastlmm	NC_012874.2	29242801	5.84131e-10	9.23	T/A	T:326_A:18	0.05
Spike length	fastlmm	NC_012874.2	29309943	5.84131e-10	9.23	T/A	T:328_A:18	0.05
Spike length	fastlmm	NC_012874.2	29315714	5.84131e-10	9.23	G/C	G:328_C:18	0.05
Spike length	fastlmm	NC_012874.2	29315836	5.84131e-10	9.23	G/A	G:326_A:18	0.05
Spike length	fastlmm	NC_012874.2	29315980	5.84131e-10	9.23	G/A	G:326_A:18	0.05
Spike length	fastlmm	NC_012874.2	29319660	5.84131e-10	9.23	C/T	C:328_T:18	0.05
Spike length	fastlmm	NC_012874.2	29321696	5.84131e-10	9.23	T/G	T:330_G:18	0.05
Spike length	fastlmm	NC_012874.2	29322207	5.84131e-10	9.23	G/A	G:330_A:18	0.05
Spike length	fastlmm	NC_012874.2	29323292	5.84131e-10	9.23	C/T	C:326_T:18	0.05
Spike length	fastlmm	NC_012874.2	29340397	5.84131e-10	9.23	T/C	T:328_C:18	0.05
Spike length	fastlmm	NC_012874.2	29341180	5.84131e-10	9.23	G/C	G:326_C:18	0.05
Spike length	fastlmm	NC_012874.2	29341575	5.84131e-10	9.23	T/A	T:326_A:18	0.05
Spike length	fastlmm	NC_012874.2	29346537	5.84131e-10	9.23	G/A	G:328_A:18	0.05
Spike length	fastlmm	NC_012874.2	29347237	5.84131e-10	9.23	A/T	A:330_T:18	0.05
Spike length	fastlmm	NC_012874.2	29411020	5.84131e-10	9.23	G/T	G:326_T:18	0.05
Spike length	fastlmm	NC_012874.2	29414710	5.84131e-10	9.23	G/T	G:326_T:18	0.05
Spike length	fastlmm	NC_012874.2	29453747	5.84131e-10	9.23	T/C	T:328_C:18	0.05
Spike length	fastlmm	NC_012874.2	29456901	5.84131e-10	9.23	G/A	G:328_A:18	0.05
Spike length	fastlmm	NC_012874.2	29461051	5.84131e-10	9.23	C/G	C:328_G:18	0.05
Spike length	fastlmm	NC_012874.2	29464281	5.84131e-10	9.23	A/C	A:326_C:18	0.05
Spike length	fastlmm	NC_012874.2	29467021	5.84131e-10	9.23	T/C	T:328_C:18	0.05
Spike length	fastlmm	NC_012874.2	29470961	5.84131e-10	9.23	C/G	C:330_G:18	0.05
Spike length	fastlmm	NC_012874.2	29493893	5.84131e-10	9.23	C/T	C:326_T:18	0.05
Spike length	fastlmm	NC_012874.2	29493985	5.84131e-10	9.23	A/T	A:326_T:18	0.05
Spike length	fastlmm	NC_012874.2	29494373	5.84131e-10	9.23	G/T	G:330_T:18	0.05
Spike length	fastlmm	NC_012874.2	29509485	5.84131e-10	9.23	C/T	C:328_T:18	0.05
Spike length	fastlmm	NC_012874.2	29509767	5.84131e-10	9.23	C/T	C:326_T:18	0.05
Spike length	fastlmm	NC_012874.2	29512574	5.84131e-10	9.23	A/G	A:328_G:18	0.05
Spike length	fastlmm	NC_012874.2	29627280	5.84131e-10	9.23	A/G	A:330_G:18	0.05
Spike length	fastlmm	NC_012874.2	29634856	5.84131e-10	9.23	C/A	C:326_A:18	0.05
Spike length	fastlmm	NC_012874.2	29635622	5.84131e-10	9.23	G/A	G:328_A:18	0.05
Spike length	fastlmm	NC_012874.2	29793725	5.84131e-10	9.23	G/A	G:328_A:18	0.05
Spike length	fastlmm	NC_012874.2	29893295	5.84131e-10	9.23	G/A	G:330_A:18	0.05
Spike length	fastlmm	NC_012874.2	29895343	5.84131e-10	9.23	G/A	G:328_A:18	0.05
Spike length	fastlmm	NC_012874.2	29906926	5.84131e-10	9.23	C/T	C:328_T:18	0.05
Spike length	fastlmm	NC_012874.2	29906989	5.84131e-10	9.23	A/T	A:328_T:18	0.05
Spike length	fastlmm	NC_012874.2	29999569	5.84131e-10	9.23	G/A	G:330_A:18	0.05
Spike length	fastlmm	NC_012874.2	30000744	5.84131e-10	9.23	T/A	T:328_A:18	0.05
Spike length	fastlmm	NC_012874.2	30002055	5.84131e-10	9.23	G/C	G:330_C:18	0.05
Spike length	fastlmm	NC_012874.2	30378383	5.84131e-10	9.23	G/A	G:326_A:18	0.05
Spike length	fastlmm	NC_012874.2	30831530	5.84131e-10	9.23	A/G	A:326_G:18	0.05
Spike length	fastlmm	NC_012874.2	30982204	5.84131e-10	9.23	C/T	C:328_T:18	0.05
Spike length	fastlmm	NC_012874.2	30985180	5.84131e-10	9.23	A/T	A:326_T:18	0.05
Spike length	fastlmm	NC_012874.2	31000566	5.84131e-10	9.23	C/T	C:330_T:18	0.05
Spike length	fastlmm	NC_012874.2	31000830	5.84131e-10	9.23	G/T	G:328_T:18	0.05
Spike length	fastlmm	NC_012874.2	31004266	5.84131e-10	9.23	G/A	G:326_A:18	0.05
Spike length	fastlmm	NC_012874.2	31016145	5.84131e-10	9.23	C/T	C:328_T:18	0.05
Spike length	fastlmm	NC_012874.2	31016191	5.84131e-10	9.23	G/T	G:330_T:18	0.05
Spike length	fastlmm	NC_012874.2	31020548	5.84131e-10	9.23	G/A	G:326_A:18	0.05
Spike length	fastlmm	NC_012874.2	31046686	5.84131e-10	9.23	G/A	G:328_A:18	0.05
Spike length	fastlmm	NC_012874.2	31048454	5.84131e-10	9.23	T/A	T:328_A:18	0.05
Spike length	fastlmm	NC_012874.2	31051402	5.84131e-10	9.23	A/G	A:326_G:18	0.05
Spike length	fastlmm	NC_012874.2	31052403	5.84131e-10	9.23	C/G	C:330_G:18	0.05
Spike length	fastlmm	NC_012874.2	31052639	5.84131e-10	9.23	C/T	C:328_T:18	0.05
Spike length	fastlmm	NC_012874.2	31055098	5.84131e-10	9.23	T/C	T:326_C:18	0.05
Spike length	fastlmm	NC_012874.2	31055484	5.84131e-10	9.23	G/A	G:328_A:18	0.05
Spike length	fastlmm	NC_012874.2	31077983	5.84131e-10	9.23	C/A	C:330_A:18	0.05
Spike length	fastlmm	NC_012874.2	31080068	5.84131e-10	9.23	C/T	C:330_T:18	0.05
Spike length	fastlmm	NC_012874.2	31080703	5.84131e-10	9.23	G/C	G:326_C:18	0.05
Spike length	fastlmm	NC_012874.2	31082393	5.84131e-10	9.23	G/A	G:328_A:18	0.05
Spike length	fastlmm	NC_012874.2	31200793	5.84131e-10	9.23	G/C	G:330_C:18	0.05
Spike length	fastlmm	NC_012874.2	31206161	5.84131e-10	9.23	G/T	G:330_T:18	0.05
Spike length	fastlmm	NC_012874.2	31208198	5.84131e-10	9.23	G/T	G:328_T:18	0.05
Spike length	fastlmm	NC_012874.2	31211015	5.84131e-10	9.23	C/T	C:328_T:18	0.05
Spike length	fastlmm	NC_012874.2	31211496	5.84131e-10	9.23	C/T	C:328_T:18	0.05
Spike length	fastlmm	NC_012874.2	31211513	5.84131e-10	9.23	G/A	G:328_A:18	0.05
Spike length	fastlmm	NC_012874.2	31212293	5.84131e-10	9.23	C/T	C:330_T:18	0.05
Spike length	fastlmm	NC_012874.2	31214600	5.84131e-10	9.23	G/A	G:328_A:18	0.05
Spike length	fastlmm	NC_012874.2	31217246	5.84131e-10	9.23	C/T	C:326_T:18	0.05
Spike length	fastlmm	NC_012874.2	31217607	5.84131e-10	9.23	C/T	C:330_T:18	0.05
Spike length	fastlmm	NC_012874.2	31219338	5.84131e-10	9.23	C/T	C:326_T:18	0.05
Spike length	fastlmm	NC_012874.2	31220371	5.84131e-10	9.23	G/A	G:328_A:18	0.05
Spike length	fastlmm	NC_012874.2	31222661	5.84131e-10	9.23	C/T	C:328_T:18	0.05
Spike length	fastlmm	NC_012874.2	31223178	5.84131e-10	9.23	C/A	C:328_A:18	0.05
Spike length	fastlmm	NC_012874.2	31231870	5.84131e-10	9.23	G/T	G:328_T:18	0.05
Spike length	fastlmm	NC_012874.2	31232923	5.84131e-10	9.23	T/G	T:330_G:18	0.05
Spike length	fastlmm	NC_012874.2	31235257	5.84131e-10	9.23	C/T	C:328_T:18	0.05
Spike length	fastlmm	NC_012874.2	31240542	5.84131e-10	9.23	C/T	C:328_T:18	0.05
Spike length	fastlmm	NC_012874.2	31240903	5.84131e-10	9.23	G/A	G:326_A:18	0.05
Spike length	fastlmm	NC_012874.2	31241027	5.84131e-10	9.23	C/G	C:328_G:18	0.05
Spike length	fastlmm	NC_012874.2	31241109	5.84131e-10	9.23	C/G	C:328_G:18	0.05
Spike length	fastlmm	NC_012874.2	31241388	5.84131e-10	9.23	C/T	C:330_T:18	0.05
Spike length	fastlmm	NC_012874.2	31246303	5.84131e-10	9.23	G/A	G:328_A:18	0.05
Spike length	fastlmm	NC_012874.2	31250339	5.84131e-10	9.23	A/G	A:328_G:18	0.05
Spike length	fastlmm	NC_012874.2	31252228	5.84131e-10	9.23	T/A	T:326_A:18	0.05
Spike length	fastlmm	NC_012874.2	31256987	5.84131e-10	9.23	G/A	G:328_A:18	0.05
Spike length	fastlmm	NC_012874.2	31259426	5.84131e-10	9.23	G/A	G:328_A:18	0.05
Spike length	fastlmm	NC_012874.2	31260114	5.84131e-10	9.23	C/G	C:330_G:18	0.05
Spike length	fastlmm	NC_012874.2	31267528	5.84131e-10	9.23	G/T	G:328_T:18	0.05
Spike length	fastlmm	NC_012874.2	31308920	5.84131e-10	9.23	C/T	C:328_T:18	0.05
Spike length	fastlmm	NC_012874.2	31309627	5.84131e-10	9.23	T/A	T:326_A:18	0.05
Spike length	fastlmm	NC_012874.2	31310433	5.84131e-10	9.23	C/T	C:328_T:18	0.05
Spike length	fastlmm	NC_012874.2	31310732	5.84131e-10	9.23	G/A	G:328_A:18	0.05
Spike length	fastlmm	NC_012874.2	31312115	5.84131e-10	9.23	C/T	C:326_T:18	0.05
Spike length	fastlmm	NC_012874.2	31312872	5.84131e-10	9.23	C/T	C:328_T:18	0.05
Spike length	fastlmm	NC_012874.2	31312905	5.84131e-10	9.23	T/C	T:330_C:18	0.05
Spike length	fastlmm	NC_012874.2	31312945	5.84131e-10	9.23	G/T	G:330_T:18	0.05
Spike length	fastlmm	NC_012874.2	31315072	5.84131e-10	9.23	G/A	G:330_A:18	0.05
Spike length	fastlmm	NC_012874.2	31324352	5.84131e-10	9.23	A/G	A:330_G:18	0.05
Spike length	fastlmm	NC_012874.2	31325498	5.84131e-10	9.23	C/A	C:330_A:18	0.05
Spike length	fastlmm	NC_012874.2	31325511	5.84131e-10	9.23	G/A	G:330_A:18	0.05
Spike length	fastlmm	NC_012874.2	31326543	5.84131e-10	9.23	A/G	A:326_G:18	0.05
Spike length	fastlmm	NC_012874.2	32194786	5.84131e-10	9.23	C/T	C:328_T:18	0.05
Spike length	fastlmm	NC_012874.2	33486369	5.84131e-10	9.23	C/G	C:328_G:18	0.05
Spike length	fastlmm	NC_012874.2	33486400	5.84131e-10	9.23	G/A	G:326_A:18	0.05
Spike length	fastlmm	NC_012874.2	34802509	5.84131e-10	9.23	C/T	C:326_T:18	0.05
Spike length	fastlmm	NC_012874.2	34802553	5.84131e-10	9.23	G/C	G:328_C:18	0.05
Spike length	fastlmm	NC_012874.2	34802934	5.84131e-10	9.23	C/T	C:328_T:18	0.05
Spike length	fastlmm	NC_012874.2	34805248	5.84131e-10	9.23	G/A	G:328_A:18	0.05
Spike length	fastlmm	NC_012874.2	34805962	5.84131e-10	9.23	T/C	T:328_C:18	0.05
Spike length	fastlmm	NC_012874.2	34811276	5.84131e-10	9.23	G/A	G:328_A:18	0.05
Spike length	fastlmm	NC_012874.2	35190554	5.84131e-10	9.23	G/A	G:326_A:18	0.05
Spike length	fastlmm	NC_012874.2	35191443	5.84131e-10	9.23	C/T	C:328_T:18	0.05
Spike length	fastlmm	NC_012874.2	35191699	5.84131e-10	9.23	G/C	G:330_C:18	0.05
Spike length	fastlmm	NC_012874.2	36400496	5.84131e-10	9.23	G/C	G:328_C:18	0.05
Spike length	fastlmm	NC_012874.2	36400738	5.84131e-10	9.23	C/A	C:330_A:18	0.05
Spike length	fastlmm	NC_012874.2	36400756	5.84131e-10	9.23	T/C	T:330_C:18	0.05
Spike length	fastlmm	NC_012874.2	37002153	5.84131e-10	9.23	T/A	T:328_A:18	0.05
Spike length	fastlmm	NC_012874.2	37002485	5.84131e-10	9.23	T/C	T:326_C:18	0.05
Spike length	fastlmm	NC_012874.2	37686967	5.84131e-10	9.23	A/G	A:328_G:18	0.05
Spike length	fastlmm	NC_012874.2	37688204	5.84131e-10	9.23	C/T	C:326_T:18	0.05
Spike length	fastlmm	NC_012874.2	37704151	5.84131e-10	9.23	C/G	C:326_G:18	0.05
Spike length	fastlmm	NC_012874.2	37706239	5.84131e-10	9.23	G/T	G:328_T:18	0.05
Spike length	fastlmm	NC_012874.2	37706334	5.84131e-10	9.23	C/T	C:328_T:18	0.05
Spike length	fastlmm	NC_012874.2	37706658	5.84131e-10	9.23	A/G	A:328_G:18	0.05
Spike length	fastlmm	NC_012874.2	37782068	5.84131e-10	9.23	C/T	C:326_T:18	0.05
Spike length	fastlmm	NC_012874.2	37785214	5.84131e-10	9.23	C/T	C:330_T:18	0.05
Spike length	fastlmm	NC_012874.2	37817791	5.84131e-10	9.23	G/T	G:326_T:18	0.05
Spike length	fastlmm	NC_012874.2	37820231	5.84131e-10	9.23	G/T	G:328_T:18	0.05
Spike length	fastlmm	NC_012874.2	37820825	5.84131e-10	9.23	G/T	G:328_T:18	0.05
Spike length	fastlmm	NC_012874.2	37822409	5.84131e-10	9.23	G/A	G:330_A:18	0.05
Spike length	fastlmm	NC_012874.2	37823333	5.84131e-10	9.23	C/G	C:326_G:18	0.05
Spike length	fastlmm	NC_012874.2	37824015	5.84131e-10	9.23	T/A	T:328_A:18	0.05
Spike length	fastlmm	NC_012874.2	37824875	5.84131e-10	9.23	C/T	C:328_T:18	0.05
Spike length	fastlmm	NC_012874.2	37825006	5.84131e-10	9.23	G/A	G:330_A:18	0.05
Spike length	fastlmm	NC_012874.2	37835111	5.84131e-10	9.23	G/T	G:328_T:18	0.05
Spike length	fastlmm	NC_012874.2	37836325	5.84131e-10	9.23	T/A	T:328_A:18	0.05
Spike length	fastlmm	NC_012874.2	37837679	5.84131e-10	9.23	T/C	T:328_C:18	0.05
Spike length	fastlmm	NC_012874.2	37839489	5.84131e-10	9.23	G/A	G:328_A:18	0.05
Spike length	fastlmm	NC_012874.2	37839875	5.84131e-10	9.23	T/A	T:326_A:18	0.05
Spike length	fastlmm	NC_012874.2	37853928	5.84131e-10	9.23	C/T	C:328_T:18	0.05
Spike length	fastlmm	NC_012874.2	37875496	5.84131e-10	9.23	A/G	A:328_G:18	0.05
Spike length	fastlmm	NC_012874.2	37875858	5.84131e-10	9.23	C/T	C:328_T:18	0.05
Spike length	fastlmm	NC_012874.2	37876296	5.84131e-10	9.23	G/A	G:328_A:18	0.05
Spike length	fastlmm	NC_012874.2	37876726	5.84131e-10	9.23	A/C	A:330_C:18	0.05
Spike length	fastlmm	NC_012874.2	37961403	5.84131e-10	9.23	C/T	C:328_T:18	0.05
Spike length	fastlmm	NC_012874.2	37965049	5.84131e-10	9.23	G/T	G:330_T:18	0.05
Spike length	fastlmm	NC_012874.2	37965813	5.84131e-10	9.23	A/C	A:330_C:18	0.05
Spike length	fastlmm	NC_012874.2	37966708	5.84131e-10	9.23	T/A	T:328_A:18	0.05
Spike length	fastlmm	NC_012874.2	37969666	5.84131e-10	9.23	C/T	C:326_T:18	0.05
Spike length	fastlmm	NC_012874.2	37970906	5.84131e-10	9.23	T/C	T:330_C:18	0.05
Spike length	fastlmm	NC_012874.2	37972180	5.84131e-10	9.23	G/A	G:326_A:18	0.05
Spike length	fastlmm	NC_012874.2	37972231	5.84131e-10	9.23	G/A	G:326_A:18	0.05
Spike length	fastlmm	NC_012874.2	37975243	5.84131e-10	9.23	G/T	G:326_T:18	0.05
Spike length	fastlmm	NC_012874.2	37992870	5.84131e-10	9.23	G/A	G:330_A:18	0.05
Spike length	fastlmm	NC_012874.2	37993307	5.84131e-10	9.23	G/A	G:328_A:18	0.05
Spike length	fastlmm	NC_012874.2	38000037	5.84131e-10	9.23	C/T	C:326_T:18	0.05
Spike length	fastlmm	NC_012874.2	38000683	5.84131e-10	9.23	G/T	G:326_T:18	0.05
Spike length	fastlmm	NC_012874.2	38004152	5.84131e-10	9.23	G/A	G:330_A:18	0.05
Spike length	fastlmm	NC_012874.2	38004268	5.84131e-10	9.23	C/T	C:328_T:18	0.05
Spike length	fastlmm	NC_012874.2	38004428	5.84131e-10	9.23	C/T	C:326_T:18	0.05
Spike length	fastlmm	NC_012874.2	38014427	5.84131e-10	9.23	G/T	G:328_T:18	0.05
Spike length	fastlmm	NC_012874.2	38019806	5.84131e-10	9.23	G/A	G:328_A:18	0.05
Spike length	fastlmm	NC_012874.2	38044565	5.84131e-10	9.23	C/T	C:326_T:18	0.05
Spike length	fastlmm	NC_012874.2	38045229	5.84131e-10	9.23	C/T	C:328_T:18	0.05
Spike length	fastlmm	NC_012874.2	38045577	5.84131e-10	9.23	C/T	C:330_T:18	0.05
Spike length	fastlmm	NC_012874.2	38046561	5.84131e-10	9.23	C/T	C:328_T:18	0.05
Spike length	fastlmm	NC_012874.2	38048416	5.84131e-10	9.23	G/A	G:326_A:18	0.05
Spike length	fastlmm	NC_012874.2	38050480	5.84131e-10	9.23	G/A	G:328_A:18	0.05
Spike length	fastlmm	NC_012874.2	38051606	5.84131e-10	9.23	T/C	T:326_C:18	0.05
Spike length	fastlmm	NC_012874.2	38054151	5.84131e-10	9.23	G/A	G:326_A:18	0.05
Spike length	fastlmm	NC_012874.2	38055446	5.84131e-10	9.23	A/G	A:326_G:18	0.05
Spike length	fastlmm	NC_012874.2	38055914	5.84131e-10	9.23	A/C	A:330_C:18	0.05
Spike length	fastlmm	NC_012874.2	38058396	5.84131e-10	9.23	A/G	A:328_G:18	0.05
Spike length	fastlmm	NC_012874.2	38058653	5.84131e-10	9.23	C/T	C:330_T:18	0.05
Spike length	fastlmm	NC_012874.2	38060975	5.84131e-10	9.23	A/C	A:330_C:18	0.05
Spike length	fastlmm	NC_012874.2	38061006	5.84131e-10	9.23	T/A	T:328_A:18	0.05
Spike length	fastlmm	NC_012874.2	38062974	5.84131e-10	9.23	A/G	A:328_G:18	0.05
Spike length	fastlmm	NC_012874.2	38063188	5.84131e-10	9.23	C/T	C:328_T:18	0.05
Spike length	fastlmm	NC_012874.2	38065659	5.84131e-10	9.23	C/T	C:328_T:18	0.05
Spike length	fastlmm	NC_012874.2	38081940	5.84131e-10	9.23	C/A	C:326_A:18	0.05
Spike length	fastlmm	NC_012874.2	38086366	5.84131e-10	9.23	T/A	T:326_A:18	0.05
Spike length	fastlmm	NC_012874.2	38086652	5.84131e-10	9.23	C/A	C:328_A:18	0.05
Spike length	fastlmm	NC_012874.2	38087335	5.84131e-10	9.23	G/A	G:328_A:18	0.05
Spike length	fastlmm	NC_012874.2	38096316	5.84131e-10	9.23	A/G	A:326_G:18	0.05
Spike length	fastlmm	NC_012874.2	38101495	5.84131e-10	9.23	T/A	T:326_A:18	0.05
Spike length	fastlmm	NC_012874.2	38103685	5.84131e-10	9.23	G/A	G:326_A:18	0.05
Spike length	fastlmm	NC_012874.2	38104428	5.84131e-10	9.23	C/G	C:326_G:18	0.05
Spike length	fastlmm	NC_012874.2	38107246	5.84131e-10	9.23	C/T	C:328_T:18	0.05
Spike length	fastlmm	NC_012874.2	38118978	5.84131e-10	9.23	G/A	G:328_A:18	0.05
Spike length	fastlmm	NC_012874.2	38123158	5.84131e-10	9.23	G/T	G:326_T:18	0.05
Spike length	fastlmm	NC_012874.2	38123544	5.84131e-10	9.23	C/T	C:328_T:18	0.05
Spike length	fastlmm	NC_012874.2	38123649	5.84131e-10	9.23	C/T	C:326_T:18	0.05
Spike length	fastlmm	NC_012874.2	38123723	5.84131e-10	9.23	T/G	T:330_G:18	0.05
Spike length	fastlmm	NC_012874.2	38125114	5.84131e-10	9.23	A/T	A:330_T:18	0.05
Spike length	fastlmm	NC_012874.2	38133535	5.84131e-10	9.23	A/T	A:328_T:18	0.05
Spike length	fastlmm	NC_012874.2	38154738	5.84131e-10	9.23	G/T	G:326_T:18	0.05
Spike length	fastlmm	NC_012874.2	38158430	5.84131e-10	9.23	C/A	C:326_A:18	0.05
Spike length	fastlmm	NC_012874.2	38170625	5.84131e-10	9.23	A/G	A:328_G:18	0.05
Spike length	fastlmm	NC_012874.2	38173141	5.84131e-10	9.23	C/A	C:328_A:18	0.05
Spike length	fastlmm	NC_012874.2	38174492	5.84131e-10	9.23	A/T	A:330_T:18	0.05
Spike length	fastlmm	NC_012874.2	38181946	5.84131e-10	9.23	G/A	G:328_A:18	0.05
Spike length	fastlmm	NC_012874.2	38203534	5.84131e-10	9.23	G/A	G:330_A:18	0.05
Spike length	fastlmm	NC_012874.2	38224103	5.84131e-10	9.23	G/C	G:328_C:18	0.05
Spike length	fastlmm	NC_012874.2	38225979	5.84131e-10	9.23	A/T	A:330_T:18	0.05
Spike length	fastlmm	NC_012874.2	38225990	5.84131e-10	9.23	C/T	C:330_T:18	0.05
Spike length	fastlmm	NC_012874.2	38240904	5.84131e-10	9.23	T/G	T:328_G:18	0.05
Spike length	fastlmm	NC_012874.2	38245899	5.84131e-10	9.23	G/A	G:328_A:18	0.05
Spike length	fastlmm	NC_012874.2	38247731	5.84131e-10	9.23	G/A	G:330_A:18	0.05
Spike length	fastlmm	NC_012874.2	38248157	5.84131e-10	9.23	A/G	A:328_G:18	0.05
Spike length	fastlmm	NC_012874.2	38261578	5.84131e-10	9.23	T/C	T:330_C:18	0.05
Spike length	fastlmm	NC_012874.2	38262756	5.84131e-10	9.23	G/A	G:328_A:18	0.05
Spike length	fastlmm	NC_012874.2	38713955	5.84131e-10	9.23	C/G	C:328_G:18	0.05
Spike length	fastlmm	NC_012874.2	38715209	5.84131e-10	9.23	G/A	G:328_A:18	0.05
Spike length	fastlmm	NC_012874.2	38715305	5.84131e-10	9.23	G/T	G:326_T:18	0.05
Spike length	fastlmm	NC_012874.2	38717429	5.84131e-10	9.23	G/T	G:328_T:18	0.05
Spike length	fastlmm	NC_012874.2	38718572	5.84131e-10	9.23	T/C	T:330_C:18	0.05
Spike length	fastlmm	NC_012874.2	38718766	5.84131e-10	9.23	G/T	G:328_T:18	0.05
Spike length	fastlmm	NC_012874.2	38718887	5.84131e-10	9.23	T/G	T:326_G:18	0.05
Spike length	fastlmm	NC_012874.2	38718924	5.84131e-10	9.23	G/A	G:328_A:18	0.05
Spike length	fastlmm	NC_012874.2	38720490	5.84131e-10	9.23	C/T	C:328_T:18	0.05
Spike length	fastlmm	NC_012874.2	38721082	5.84131e-10	9.23	G/A	G:328_A:18	0.05
Spike length	fastlmm	NC_012874.2	38730844	5.84131e-10	9.23	C/T	C:328_T:18	0.05
Spike length	fastlmm	NC_012874.2	38740364	5.84131e-10	9.23	G/A	G:328_A:18	0.05
Spike length	fastlmm	NC_012874.2	38752505	5.84131e-10	9.23	G/A	G:328_A:18	0.05
Spike length	fastlmm	NC_012874.2	38754177	5.84131e-10	9.23	G/A	G:328_A:18	0.05
Spike length	fastlmm	NC_012874.2	38755099	5.84131e-10	9.23	C/T	C:330_T:18	0.05
Spike length	fastlmm	NC_012874.2	38755230	5.84131e-10	9.23	G/T	G:326_T:18	0.05
Spike length	fastlmm	NC_012874.2	38755393	5.84131e-10	9.23	G/A	G:328_A:18	0.05
Spike length	fastlmm	NC_012874.2	38755443	5.84131e-10	9.23	T/C	T:328_C:18	0.05
Spike length	fastlmm	NC_012874.2	38755482	5.84131e-10	9.23	G/A	G:328_A:18	0.05
Spike length	fastlmm	NC_012874.2	38756174	5.84131e-10	9.23	C/T	C:330_T:18	0.05
Spike length	fastlmm	NC_012874.2	38756980	5.84131e-10	9.23	A/G	A:326_G:18	0.05
Spike length	fastlmm	NC_012874.2	38757060	5.84131e-10	9.23	G/C	G:330_C:18	0.05
Spike length	fastlmm	NC_012874.2	38757838	5.84131e-10	9.23	T/C	T:328_C:18	0.05
Spike length	fastlmm	NC_012874.2	38760325	5.84131e-10	9.23	C/A	C:330_A:18	0.05
Spike length	fastlmm	NC_012874.2	38766752	5.84131e-10	9.23	G/C	G:328_C:18	0.05
Spike length	fastlmm	NC_012874.2	38769793	5.84131e-10	9.23	C/G	C:328_G:18	0.05
Spike length	fastlmm	NC_012874.2	38770854	5.84131e-10	9.23	A/G	A:328_G:18	0.05
Spike length	fastlmm	NC_012874.2	38776514	5.84131e-10	9.23	A/T	A:326_T:18	0.05
Spike length	fastlmm	NC_012874.2	38778630	5.84131e-10	9.23	T/A	T:330_A:18	0.05
Spike length	fastlmm	NC_012874.2	38779899	5.84131e-10	9.23	T/A	T:330_A:18	0.05
Spike length	fastlmm	NC_012874.2	38780586	5.84131e-10	9.23	G/A	G:326_A:18	0.05
Spike length	fastlmm	NC_012874.2	38780612	5.84131e-10	9.23	G/A	G:328_A:18	0.05
Spike length	fastlmm	NC_012874.2	38784270	5.84131e-10	9.23	G/A	G:326_A:18	0.05
Spike length	fastlmm	NC_012874.2	38784936	5.84131e-10	9.23	C/T	C:328_T:18	0.05
Spike length	fastlmm	NC_012874.2	38789125	5.84131e-10	9.23	C/T	C:328_T:18	0.05
Spike length	fastlmm	NC_012874.2	38789286	5.84131e-10	9.23	G/T	G:330_T:18	0.05
Spike length	fastlmm	NC_012874.2	38789466	5.84131e-10	9.23	G/A	G:328_A:18	0.05
Spike length	fastlmm	NC_012874.2	38790526	5.84131e-10	9.23	C/T	C:328_T:18	0.05
Spike length	fastlmm	NC_012874.2	38790577	5.84131e-10	9.23	C/T	C:328_T:18	0.05
Spike length	fastlmm	NC_012874.2	38792204	5.84131e-10	9.23	G/A	G:328_A:18	0.05
Spike length	fastlmm	NC_012874.2	38792622	5.84131e-10	9.23	A/T	A:326_T:18	0.05
Spike length	fastlmm	NC_012874.2	38792935	5.84131e-10	9.23	A/G	A:328_G:18	0.05
Spike length	fastlmm	NC_012874.2	38794719	5.84131e-10	9.23	C/A	C:330_A:18	0.05
Spike length	fastlmm	NC_012874.2	38795037	5.84131e-10	9.23	G/A	G:330_A:18	0.05
Spike length	fastlmm	NC_012874.2	38795648	5.84131e-10	9.23	G/A	G:326_A:18	0.05
Spike length	fastlmm	NC_012874.2	38795748	5.84131e-10	9.23	G/C	G:326_C:18	0.05
Spike length	fastlmm	NC_012874.2	38795856	5.84131e-10	9.23	G/C	G:330_C:18	0.05
Spike length	fastlmm	NC_012874.2	38795868	5.84131e-10	9.23	C/G	C:328_G:18	0.05
Spike length	fastlmm	NC_012874.2	38799161	5.84131e-10	9.23	C/A	C:328_A:18	0.05
Spike length	fastlmm	NC_012874.2	38807515	5.84131e-10	9.23	T/A	T:328_A:18	0.05
Spike length	fastlmm	NC_012874.2	38809936	5.84131e-10	9.23	C/T	C:326_T:18	0.05
Spike length	fastlmm	NC_012874.2	38819289	5.84131e-10	9.23	G/T	G:328_T:18	0.05
Spike length	fastlmm	NC_012874.2	38828195	5.84131e-10	9.23	C/A	C:328_A:18	0.05
Spike length	fastlmm	NC_012874.2	38834512	5.84131e-10	9.23	G/A	G:328_A:18	0.05
Spike length	fastlmm	NC_012874.2	38835347	5.84131e-10	9.23	G/A	G:328_A:18	0.05
Spike length	fastlmm	NC_012874.2	38835637	5.84131e-10	9.23	C/G	C:328_G:18	0.05
Spike length	fastlmm	NC_012874.2	38835668	5.84131e-10	9.23	A/C	A:328_C:18	0.05
Spike length	fastlmm	NC_012874.2	38836380	5.84131e-10	9.23	C/T	C:326_T:18	0.05
Spike length	fastlmm	NC_012874.2	38838431	5.84131e-10	9.23	T/A	T:330_A:18	0.05
Spike length	fastlmm	NC_012874.2	38839021	5.84131e-10	9.23	C/T	C:326_T:18	0.05
Spike length	fastlmm	NC_012874.2	38840922	5.84131e-10	9.23	A/G	A:326_G:18	0.05
Spike length	fastlmm	NC_012874.2	38841621	5.84131e-10	9.23	C/A	C:328_A:18	0.05
Spike length	fastlmm	NC_012874.2	38843362	5.84131e-10	9.23	G/T	G:326_T:18	0.05
Spike length	fastlmm	NC_012874.2	38852113	5.84131e-10	9.23	G/A	G:326_A:18	0.05
Spike length	fastlmm	NC_012874.2	38855375	5.84131e-10	9.23	C/T	C:328_T:18	0.05
Spike length	fastlmm	NC_012874.2	38856562	5.84131e-10	9.23	A/T	A:326_T:18	0.05
Spike length	fastlmm	NC_012874.2	38859585	5.84131e-10	9.23	C/T	C:328_T:18	0.05
Spike length	fastlmm	NC_012874.2	38859636	5.84131e-10	9.23	T/G	T:328_G:18	0.05
Spike length	fastlmm	NC_012874.2	38859759	5.84131e-10	9.23	G/A	G:328_A:18	0.05
Spike length	fastlmm	NC_012874.2	38861237	5.84131e-10	9.23	G/A	G:330_A:18	0.05
Spike length	fastlmm	NC_012874.2	38863235	5.84131e-10	9.23	G/A	G:328_A:18	0.05
Spike length	fastlmm	NC_012874.2	38864968	5.84131e-10	9.23	C/T	C:326_T:18	0.05
Spike length	fastlmm	NC_012874.2	38886093	5.84131e-10	9.23	G/A	G:330_A:18	0.05
Spike length	fastlmm	NC_012874.2	38886405	5.84131e-10	9.23	C/T	C:328_T:18	0.05
Spike length	fastlmm	NC_012874.2	38887149	5.84131e-10	9.23	G/A	G:326_A:18	0.05
Spike length	fastlmm	NC_012874.2	38888738	5.84131e-10	9.23	C/T	C:330_T:18	0.05
Spike length	fastlmm	NC_012874.2	38890011	5.84131e-10	9.23	C/T	C:328_T:18	0.05
Spike length	fastlmm	NC_012874.2	38895599	5.84131e-10	9.23	G/A	G:326_A:18	0.05
Spike length	fastlmm	NC_012874.2	38909630	5.84131e-10	9.23	G/T	G:328_T:18	0.05
Spike length	fastlmm	NC_012874.2	38909752	5.84131e-10	9.23	T/C	T:328_C:18	0.05
Spike length	fastlmm	NC_012874.2	38912175	5.84131e-10	9.23	G/A	G:328_A:18	0.05
Spike length	fastlmm	NC_012874.2	38915408	5.84131e-10	9.23	C/T	C:328_T:18	0.05
Spike length	fastlmm	NC_012874.2	38922790	5.84131e-10	9.23	C/T	C:328_T:18	0.05
Spike length	fastlmm	NC_012874.2	38939894	5.84131e-10	9.23	G/A	G:326_A:18	0.05
Spike length	fastlmm	NC_012874.2	38942444	5.84131e-10	9.23	G/C	G:326_C:18	0.05
Spike length	fastlmm	NC_012874.2	38943256	5.84131e-10	9.23	G/T	G:328_T:18	0.05
Spike length	fastlmm	NC_012874.2	38950488	5.84131e-10	9.23	C/T	C:328_T:18	0.05
Spike length	fastlmm	NC_012874.2	39428770	5.84131e-10	9.23	G/A	G:328_A:18	0.05
Spike length	fastlmm	NC_012874.2	39781260	5.84131e-10	9.23	C/T	C:328_T:18	0.05
Spike length	fastlmm	NC_012874.2	39781480	5.84131e-10	9.23	C/T	C:328_T:18	0.05
Spike length	fastlmm	NC_012874.2	39821313	5.84131e-10	9.23	T/A	T:328_A:18	0.05
Spike length	fastlmm	NC_012874.2	39822191	5.84131e-10	9.23	G/C	G:328_C:18	0.05
Spike length	fastlmm	NC_012874.2	39824062	5.84131e-10	9.23	C/T	C:328_T:18	0.05
Spike length	fastlmm	NC_012874.2	39824125	5.84131e-10	9.23	G/A	G:328_A:18	0.05
Spike length	fastlmm	NC_012874.2	39824781	5.84131e-10	9.23	C/T	C:328_T:18	0.05
Spike length	fastlmm	NC_012874.2	40438290	5.84131e-10	9.23	C/G	C:328_G:18	0.05
Spike length	fastlmm	NC_012874.2	40441410	5.84131e-10	9.23	C/T	C:330_T:18	0.05
Spike length	fastlmm	NC_012874.2	40444956	5.84131e-10	9.23	G/A	G:328_A:18	0.05
Spike length	fastlmm	NC_012874.2	40445280	5.84131e-10	9.23	A/C	A:328_C:18	0.05
Spike length	fastlmm	NC_012874.2	40445478	5.84131e-10	9.23	G/A	G:328_A:18	0.05
Spike length	fastlmm	NC_012874.2	40447568	5.84131e-10	9.23	A/T	A:326_T:18	0.05
Spike length	fastlmm	NC_012874.2	40448014	5.84131e-10	9.23	A/T	A:328_T:18	0.05
Spike length	fastlmm	NC_012874.2	40655537	5.84131e-10	9.23	C/A	C:328_A:18	0.05
Spike length	fastlmm	NC_012874.2	40655744	5.84131e-10	9.23	C/T	C:328_T:18	0.05
Spike length	fastlmm	NC_012874.2	40657112	5.84131e-10	9.23	A/G	A:328_G:18	0.05
Spike length	fastlmm	NC_012874.2	40945785	5.84131e-10	9.23	C/G	C:328_G:18	0.05
Spike length	fastlmm	NC_012874.2	41616861	5.84131e-10	9.23	C/T	C:326_T:18	0.05
Spike length	fastlmm	NC_012874.2	41888054	5.84131e-10	9.23	G/T	G:328_T:18	0.05
Spike length	fastlmm	NC_012874.2	42418076	5.84131e-10	9.23	G/T	G:330_T:18	0.05
Spike length	fastlmm	NC_012874.2	44222533	5.84131e-10	9.23	T/C	T:328_C:18	0.05
Spike length	fastlmm	NC_012874.2	44256089	5.84131e-10	9.23	G/A	G:328_A:18	0.05
Spike length	fastlmm	NC_012874.2	44734059	5.84131e-10	9.23	A/G	A:328_G:18	0.05
Spike length	fastlmm	NC_012874.2	44740750	5.84131e-10	9.23	C/T	C:326_T:18	0.05
Spike length	fastlmm	NC_012874.2	44833047	5.84131e-10	9.23	C/T	C:328_T:18	0.05
Spike length	fastlmm	NC_012874.2	44834123	5.84131e-10	9.23	G/A	G:328_A:18	0.05
Spike length	fastlmm	NC_012874.2	44835331	5.84131e-10	9.23	C/A	C:330_A:18	0.05
Spike length	fastlmm	NC_012874.2	44838299	5.84131e-10	9.23	T/A	T:328_A:18	0.05
Spike length	fastlmm	NC_012874.2	44839225	5.84131e-10	9.23	C/T	C:330_T:18	0.05
Spike length	fastlmm	NC_012874.2	44842200	5.84131e-10	9.23	C/G	C:326_G:18	0.05
Spike length	fastlmm	NC_012874.2	44928974	5.84131e-10	9.23	G/A	G:328_A:18	0.05
Spike length	fastlmm	NC_012874.2	44934703	5.84131e-10	9.23	G/A	G:330_A:18	0.05
Spike length	fastlmm	NC_012874.2	45157548	5.84131e-10	9.23	A/T	A:326_T:18	0.05
Spike length	fastlmm	NC_012874.2	45272528	5.84131e-10	9.23	G/T	G:328_T:18	0.05
Spike length	fastlmm	NC_012874.2	45561928	5.84131e-10	9.23	G/A	G:328_A:18	0.05
Spike length	fastlmm	NC_012874.2	45563312	5.84131e-10	9.23	G/A	G:330_A:18	0.05
Spike length	fastlmm	NC_012874.2	45565414	5.84131e-10	9.23	A/T	A:328_T:18	0.05
Spike length	fastlmm	NC_012874.2	45620794	5.84131e-10	9.23	G/T	G:330_T:18	0.05
Spike length	fastlmm	NC_012874.2	45620873	5.84131e-10	9.23	G/A	G:328_A:18	0.05
Spike length	fastlmm	NC_012874.2	45745931	5.84131e-10	9.23	G/C	G:328_C:18	0.05
Spike length	fastlmm	NC_012874.2	45811454	5.84131e-10	9.23	G/A	G:326_A:18	0.05
Spike length	fastlmm	NC_012874.2	45823253	5.84131e-10	9.23	G/T	G:328_T:18	0.05
Spike length	fastlmm	NC_012874.2	47680339	5.84131e-10	9.23	G/A	G:328_A:18	0.05
Spike length	fastlmm	NC_012874.2	47900848	5.84131e-10	9.23	T/A	T:328_A:18	0.05
Spike length	fastlmm	NC_012874.2	31234463	5.87133e-10	9.23	G/A	G:328_A:18	0.05
Spike length	fastlmm	NC_012874.2	23463826	5.89126e-10	9.23	C/T	C:326_T:18	0.05
Spike length	fastlmm	NC_012874.2	23463920	5.89126e-10	9.23	A/G	A:328_G:18	0.05
Spike length	fastlmm	NC_012874.2	43860846	5.89126e-10	9.23	G/A	G:330_A:18	0.05
Spike length	fastlmm	NC_012874.2	31042464	5.8919e-10	9.23	G/A	G:338_A:18	0.05
Spike length	fastlmm	NC_012874.2	38227037	5.9125e-10	9.23	C/T	C:326_T:18	0.05
Spike length	fastlmm	NC_012874.2	38720072	5.91501e-10	9.23	A/C	A:328_C:18	0.05
Spike length	fastlmm	NC_012874.2	38250883	5.92476e-10	9.23	G/A	G:334_A:18	0.05
Spike length	fastlmm	NC_012874.2	38930842	5.93049e-10	9.23	C/T	C:326_T:18	0.05
Spike length	fastlmm	NC_012874.2	23435753	5.99622e-10	9.22	C/A	C:326_A:18	0.05
Spike length	fastlmm	NC_012874.2	31319968	6.00282e-10	9.22	A/T	A:326_T:18	0.05
Spike length	fastlmm	NC_012874.2	23469136	6.01636e-10	9.22	G/A	G:332_A:18	0.05
Spike length	fastlmm	NC_012871.2	11557052	6.02196e-10	9.22	G/A	G:334_A:18	0.05
Spike length	fastlmm	NC_012874.2	37780714	6.06855e-10	9.22	A/C	A:326_C:18	0.05
Spike length	fastlmm	NC_012874.2	38819634	6.07647e-10	9.22	T/A	T:326_A:18	0.05
Spike length	fastlmm	NC_012874.2	40948490	6.07647e-10	9.22	C/T	C:328_T:18	0.05
Spike length	fastlmm	NC_012874.2	28761479	6.11515e-10	9.21	G/A	G:326_A:18	0.05
Spike length	fastlmm	NC_012874.2	38886061	6.12593e-10	9.21	C/A	C:326_A:18	0.05
Spike length	fastlmm	NC_012874.2	29506166	6.14269e-10	9.21	G/C	G:326_C:18	0.05
Spike length	fastlmm	NC_012874.2	29506799	6.14269e-10	9.21	C/A	C:326_A:18	0.05
Spike length	fastlmm	NC_012874.2	29507116	6.14269e-10	9.21	G/C	G:326_C:18	0.05
Spike length	fastlmm	NC_012874.2	37872847	6.14269e-10	9.21	G/T	G:326_T:18	0.05
Spike length	fastlmm	NC_012874.2	30996571	6.14332e-10	9.21	C/T	C:326_T:18	0.05
Spike length	fastlmm	NC_012874.2	28242069	6.15218e-10	9.21	C/T	C:342_T:18	0.05
Spike length	fastlmm	NC_012874.2	38028076	6.15893e-10	9.21	C/T	C:336_T:18	0.05
Spike length	fastlmm	NC_012874.2	23436508	6.16117e-10	9.21	C/A	C:334_A:18	0.05
Spike length	fastlmm	NC_012874.2	37723819	6.17182e-10	9.21	C/T	C:328_T:18	0.05
Spike length	fastlmm	NC_012874.2	29905611	6.18996e-10	9.21	G/A	G:328_A:18	0.05
Spike length	fastlmm	NC_012874.2	23480302	6.19128e-10	9.21	G/A	G:326_A:18	0.05
Spike length	fastlmm	NC_012874.2	28160515	6.19128e-10	9.21	G/A	G:326_A:18	0.05
Spike length	fastlmm	NC_012874.2	29244282	6.19128e-10	9.21	T/C	T:328_C:18	0.05
Spike length	fastlmm	NC_012874.2	29513485	6.19128e-10	9.21	G/T	G:326_T:18	0.05
Spike length	fastlmm	NC_012874.2	29635221	6.19128e-10	9.21	T/C	T:326_C:18	0.05
Spike length	fastlmm	NC_012874.2	31236453	6.19128e-10	9.21	A/T	A:326_T:18	0.05
Spike length	fastlmm	NC_012874.2	31314540	6.19128e-10	9.21	A/G	A:326_G:18	0.05
Spike length	fastlmm	NC_012874.2	38753092	6.19128e-10	9.21	G/A	G:326_A:18	0.05
Spike length	fastlmm	NC_012874.2	38759651	6.19128e-10	9.21	C/A	C:326_A:18	0.05
Spike length	fastlmm	NC_012874.2	43863981	6.19128e-10	9.21	C/T	C:328_T:18	0.05
Spike length	fastlmm	NC_012874.2	23507370	6.19128e-10	9.21	C/A	C:326_A:18	0.05
Spike length	fastlmm	NC_012874.2	28140937	6.19128e-10	9.21	C/G	C:326_G:18	0.05
Spike length	fastlmm	NC_012874.2	29796152	6.19128e-10	9.21	C/G	C:326_G:18	0.05
Spike length	fastlmm	NC_012874.2	31212528	6.19128e-10	9.21	A/C	A:326_C:18	0.05
Spike length	fastlmm	NC_012874.2	31217338	6.19128e-10	9.21	G/T	G:326_T:18	0.05
Spike length	fastlmm	NC_012874.2	38753080	6.19128e-10	9.21	G/A	G:326_A:18	0.05
Spike length	fastlmm	NC_012874.2	37682107	6.24523e-10	9.2	C/T	C:326_T:18	0.05
Spike length	fastlmm	NC_012874.2	29493527	6.2686e-10	9.2	G/A	G:328_A:18	0.05
Spike length	fastlmm	NC_012874.2	30383638	6.28134e-10	9.2	A/T	A:332_T:18	0.05
Spike length	fastlmm	NC_012874.2	39427883	6.2949e-10	9.2	C/A	C:326_A:18	0.05
Spike length	fastlmm	NC_012874.2	28643392	6.31308e-10	9.2	T/G	T:328_G:18	0.05
Spike length	fastlmm	NC_012874.2	38932402	6.32096e-10	9.2	T/C	T:326_C:18	0.05
Spike length	fastlmm	NC_012874.2	26757799	6.32526e-10	9.2	G/A	G:336_A:18	0.05
Spike length	fastlmm	NC_012874.2	42412156	6.32687e-10	9.2	C/T	C:326_T:18	0.05
Spike length	fastlmm	NC_012874.2	24079177	6.35005e-10	9.2	G/A	G:328_A:18	0.05
Spike length	fastlmm	NC_012874.2	31740638	6.36096e-10	9.2	C/T	C:326_T:18	0.05
Spike length	fastlmm	NC_012874.2	31740794	6.36096e-10	9.2	G/A	G:328_A:18	0.05
Spike length	fastlmm	NC_012874.2	23432232	6.36445e-10	9.2	G/A	G:326_A:18	0.05
Spike length	fastlmm	NC_012874.2	29895980	6.39801e-10	9.19	C/T	C:328_T:18	0.05
Spike length	fastlmm	NC_012874.2	28766623	6.41327e-10	9.19	A/T	A:340_T:18	0.05
Spike length	fastlmm	NC_012874.2	38061136	6.42911e-10	9.19	T/G	T:334_G:18	0.05
Spike length	fastlmm	NC_012874.2	37966506	6.43564e-10	9.19	G/A	G:326_A:18	0.05
Spike length	fastlmm	NC_012874.2	37742241	6.45273e-10	9.19	G/A	G:326_A:18	0.05
Spike length	fastlmm	NC_012874.2	37743714	6.45273e-10	9.19	C/T	C:326_T:18	0.05
Spike length	fastlmm	NC_012874.2	31206045	6.46945e-10	9.19	G/T	G:328_T:18	0.05
Spike length	fastlmm	NC_012874.2	39781315	6.48784e-10	9.19	C/G	C:326_G:18	0.05
Spike length	fastlmm	NC_012874.2	23447200	6.49149e-10	9.19	T/C	T:332_C:18	0.05
Spike length	fastlmm	NC_012874.2	29630779	6.49149e-10	9.19	T/A	T:332_A:18	0.05
Spike length	fastlmm	NC_012874.2	31001513	6.49149e-10	9.19	G/A	G:332_A:18	0.05
Spike length	fastlmm	NC_012874.2	23447281	6.49149e-10	9.19	C/T	C:332_T:18	0.05
Spike length	fastlmm	NC_012874.2	23465388	6.49149e-10	9.19	A/T	A:332_T:18	0.05
Spike length	fastlmm	NC_012874.2	34811165	6.49149e-10	9.19	A/T	A:330_T:18	0.05
Spike length	fastlmm	NC_012874.2	38835185	6.49149e-10	9.19	C/T	C:332_T:18	0.05
Spike length	fastlmm	NC_012874.2	31007293	6.50226e-10	9.19	C/G	C:338_G:18	0.05
Spike length	fastlmm	NC_012874.2	31008717	6.5039e-10	9.19	C/A	C:326_A:18	0.05
Spike length	fastlmm	NC_012874.2	45608691	6.5053e-10	9.19	G/A	G:332_A:18	0.05
Spike length	fastlmm	NC_012874.2	31199112	6.51578e-10	9.19	G/A	G:332_A:18	0.05
Spike length	fastlmm	NC_012874.2	31321303	6.51578e-10	9.19	G/A	G:332_A:18	0.05
Spike length	fastlmm	NC_012874.2	31003619	6.51755e-10	9.19	C/T	C:330_T:18	0.05
Spike length	fastlmm	NC_012874.2	22291757	6.5251e-10	9.19	T/C	T:330_C:18	0.05
Spike length	fastlmm	NC_012874.2	31043201	6.5251e-10	9.19	G/A	G:328_A:18	0.05
Spike length	fastlmm	NC_012874.2	31309986	6.56113e-10	9.18	C/T	C:328_T:18	0.05
Spike length	fastlmm	NC_012874.2	26037436	6.5645e-10	9.18	A/G	A:330_G:18	0.05
Spike length	fastlmm	NC_012874.2	37839394	6.6006e-10	9.18	T/A	T:326_A:18	0.05
Spike length	fastlmm	NC_012874.2	25617022	6.61956e-10	9.18	C/T	C:342_T:18	0.05
Spike length	fastlmm	NC_012874.2	25836193	6.65714e-10	9.18	C/T	C:330_T:18	0.05
Spike length	fastlmm	NC_012874.2	31079524	6.6951e-10	9.17	G/A	G:330_A:18	0.05
Spike length	fastlmm	NC_012874.2	37877310	6.6951e-10	9.17	G/A	G:328_A:18	0.05
Spike length	fastlmm	NC_012874.2	38816884	6.75095e-10	9.17	G/A	G:326_A:18	0.05
Spike length	fastlmm	NC_012874.2	37679507	6.7914e-10	9.17	G/A	G:328_A:18	0.05
Spike length	fastlmm	NC_012874.2	31238860	6.80392e-10	9.17	C/T	C:326_T:18	0.05
Spike length	fastlmm	NC_012874.2	30195849	6.84034e-10	9.16	G/A	G:326_A:18	0.05
Spike length	fastlmm	NC_012874.2	23424433	6.85087e-10	9.16	C/T	C:334_T:18	0.05
Spike length	fastlmm	NC_012874.2	31040082	6.8582e-10	9.16	G/A	G:332_A:18	0.05
Spike length	fastlmm	NC_012874.2	28758305	6.86467e-10	9.16	C/T	C:328_T:18	0.05
Spike length	fastlmm	NC_012874.2	38736702	6.88679e-10	9.16	C/T	C:330_T:18	0.05
Spike length	fastlmm	NC_012874.2	38753215	6.90609e-10	9.16	C/A	C:328_A:18	0.05
Spike length	fastlmm	NC_012874.2	38836015	6.92737e-10	9.16	A/G	A:326_G:18	0.05
Spike length	fastlmm	NC_012874.2	38226760	6.94838e-10	9.16	A/T	A:328_T:18	0.05
Spike length	fastlmm	NC_012874.2	39824238	6.94838e-10	9.16	G/T	G:330_T:18	0.05
Spike length	fastlmm	NC_012874.2	31312214	6.97582e-10	9.16	G/A	G:328_A:18	0.05
Spike length	fastlmm	NC_012874.2	30831192	7.05365e-10	9.15	C/A	C:326_A:18	0.05
Spike length	fastlmm	NC_012874.2	31045058	7.05365e-10	9.15	G/A	G:326_A:18	0.05
Spike length	fastlmm	NC_012874.2	29255481	7.09247e-10	9.15	C/T	C:334_T:18	0.05
Spike length	fastlmm	NC_012874.2	29465934	7.10325e-10	9.15	C/T	C:328_T:18	0.05
Spike length	fastlmm	NC_012874.2	31258894	7.10325e-10	9.15	G/C	G:328_C:18	0.05
Spike length	fastlmm	NC_012874.2	38015749	7.10325e-10	9.15	G/A	G:328_A:18	0.05
Spike length	fastlmm	NC_012874.2	38015905	7.10325e-10	9.15	G/A	G:328_A:18	0.05
Spike length	fastlmm	NC_012874.2	40444923	7.13752e-10	9.15	G/A	G:334_A:18	0.05
Spike length	fastlmm	NC_012874.2	23441725	7.16308e-10	9.14	G/A	G:326_A:18	0.05
Spike length	fastlmm	NC_012874.2	24004876	7.16308e-10	9.14	A/G	A:326_G:18	0.05
Spike length	fastlmm	NC_012874.2	37964979	7.16308e-10	9.14	T/A	T:328_A:18	0.05
Spike length	fastlmm	NC_012874.2	37690369	7.2124e-10	9.14	G/A	G:328_A:18	0.05
Spike length	fastlmm	NC_012874.2	27364517	7.22125e-10	9.14	C/T	C:336_T:18	0.05
Spike length	fastlmm	NC_012874.2	31256516	7.23694e-10	9.14	C/G	C:326_G:18	0.05
Spike length	fastlmm	NC_012874.2	31822601	7.23694e-10	9.14	G/T	G:326_T:18	0.05
Spike length	fastlmm	NC_012874.2	44735951	7.23694e-10	9.14	A/G	A:328_G:18	0.05
Spike length	fastlmm	NC_012874.2	30985662	7.26571e-10	9.14	G/T	G:328_T:18	0.05
Spike length	fastlmm	NC_012874.2	29317441	7.29053e-10	9.14	A/T	A:328_T:18	0.05
Spike length	fastlmm	NC_012874.2	38173460	7.29053e-10	9.14	C/T	C:328_T:18	0.05
Spike length	fastlmm	NC_012874.2	27364536	7.29812e-10	9.14	T/A	T:336_A:18	0.05
Spike length	fastlmm	NC_012874.2	45811107	7.35087e-10	9.13	A/G	A:336_G:18	0.05
Spike length	fastlmm	NC_012874.2	37740649	7.43099e-10	9.13	C/T	C:326_T:18	0.05
Spike length	fastlmm	NC_012874.2	29316514	7.44352e-10	9.13	T/G	T:326_G:18	0.05
Spike length	fastlmm	NC_012874.2	38716328	7.44381e-10	9.13	C/A	C:326_A:18	0.05
Spike length	fastlmm	NC_012874.2	22336507	7.45315e-10	9.13	C/A	C:326_A:18	0.05
Spike length	fastlmm	NC_012874.2	30194261	7.46108e-10	9.13	C/T	C:326_T:18	0.05
Spike length	fastlmm	NC_012874.2	29906841	7.51893e-10	9.12	G/T	G:340_T:18	0.05
Spike length	fastlmm	NC_012874.2	34805427	7.55766e-10	9.12	C/T	C:326_T:18	0.05
Spike length	fastlmm	NC_012874.2	38044428	7.59944e-10	9.12	G/A	G:328_A:18	0.05
Spike length	fastlmm	NC_012874.2	28950706	7.6115e-10	9.12	G/C	G:328_C:18	0.05
Spike length	fastlmm	NC_012874.2	28951039	7.6115e-10	9.12	G/T	G:326_T:18	0.05
Spike length	fastlmm	NC_012874.2	28950843	7.6115e-10	9.12	G/T	G:326_T:18	0.05
Spike length	fastlmm	NC_012874.2	29414620	7.6115e-10	9.12	G/A	G:326_A:18	0.05
Spike length	fastlmm	NC_012874.2	45606074	7.66007e-10	9.12	A/G	A:328_G:18	0.05
Spike length	fastlmm	NC_012874.2	28686974	7.68521e-10	9.11	C/G	C:326_G:18	0.05
Spike length	fastlmm	NC_012874.2	23427530	7.77563e-10	9.11	C/T	C:332_T:18	0.05
Spike length	fastlmm	NC_012874.2	31020058	7.77873e-10	9.11	G/C	G:330_C:18	0.05
Spike length	fastlmm	NC_012874.2	38884170	7.77873e-10	9.11	G/A	G:330_A:18	0.05
Spike length	fastlmm	NC_012874.2	44929878	7.77873e-10	9.11	C/G	C:330_G:18	0.05
Spike length	fastlmm	NC_012874.2	28684013	7.86466e-10	9.1	A/G	A:338_G:18	0.05
Spike length	fastlmm	NC_012874.2	31747202	7.87762e-10	9.1	G/A	G:328_A:18	0.05
Spike length	fastlmm	NC_012874.2	38161610	7.9622e-10	9.1	G/T	G:326_T:18	0.05
Spike length	fastlmm	NC_012874.2	28234582	8.07777e-10	9.09	G/T	G:326_T:18	0.05
Spike length	fastlmm	NC_012874.2	31233614	8.07777e-10	9.09	C/T	C:326_T:18	0.05
Spike length	fastlmm	NC_012874.2	38139899	8.07777e-10	9.09	G/A	G:326_A:18	0.05
Spike length	fastlmm	NC_012874.2	28692849	8.07784e-10	9.09	G/A	G:328_A:18	0.05
Spike length	fastlmm	NC_012874.2	31233630	8.07784e-10	9.09	C/T	C:326_T:18	0.05
Spike length	fastlmm	NC_012874.2	28642310	8.09263e-10	9.09	C/G	C:330_G:18	0.05
Spike length	fastlmm	NC_012874.2	29242548	8.09614e-10	9.09	G/A	G:328_A:18	0.05
Spike length	fastlmm	NC_012874.2	38042179	8.18542e-10	9.09	C/T	C:330_T:18	0.05
Spike length	fastlmm	NC_012874.2	47026721	8.23236e-10	9.08	A/C	A:328_C:18	0.05
Spike length	fastlmm	NC_012874.2	25080024	8.25225e-10	9.08	C/T	C:324_T:22	0.06
Spike length	fastlmm	NC_012874.2	37709161	8.25415e-10	9.08	A/G	A:326_G:18	0.05
Spike length	fastlmm	NC_012874.2	28583032	8.2612e-10	9.08	T/C	T:332_C:18	0.05
Spike length	fastlmm	NC_012874.2	47818017	8.32999e-10	9.08	G/A	G:338_A:18	0.05
Spike length	fastlmm	NC_012874.2	37443491	8.33769e-10	9.08	C/T	C:330_T:18	0.05
Spike length	fastlmm	NC_012871.2	9076953	8.40727e-10	9.08	T/C	T:403_C:25	0.06
Spike length	fastlmm	NC_012874.2	30994545	8.40773e-10	9.08	G/T	G:328_T:18	0.05
Spike length	fastlmm	NC_012874.2	38841985	8.41353e-10	9.08	A/T	A:326_T:18	0.05
Spike length	fastlmm	NC_012874.2	41401506	8.5251e-10	9.07	T/C	T:334_C:18	0.05
Spike length	fastlmm	NC_012874.2	38811313	8.64131e-10	9.06	C/A	C:336_A:18	0.05
Spike length	fastlmm	NC_012871.2	9077538	8.7602e-10	9.06	A/G	A:401_G:25	0.06
Spike length	fastlmm	NC_012874.2	23468943	9.03342e-10	9.04	G/A	G:336_A:18	0.05
Spike length	fastlmm	NC_012874.2	38936530	9.0487e-10	9.04	A/C	A:336_C:18	0.05
Spike length	fastlmm	NC_012874.2	38057877	9.09146e-10	9.04	G/A	G:326_A:18	0.05
Spike length	fastlmm	NC_012874.2	23487910	9.21329e-10	9.04	G/A	G:336_A:20	0.06
Spike length	fastlmm	NC_012874.2	38154332	9.28242e-10	9.03	C/T	C:328_T:18	0.05
Spike length	fastlmm	NC_012874.2	36334052	9.7205e-10	9.01	G/A	G:330_A:18	0.05
Spike length	fastlmm	NC_012874.2	31744908	9.76142e-10	9.01	G/C	G:336_C:18	0.05
Spike length	fastlmm	NC_012874.2	37443596	9.7911e-10	9.01	A/G	A:328_G:18	0.05
Spike length	fastlmm	NC_012876.2	49250801	9.94669e-10	9	G/T	G:214_T:208	0.49
Spike length	fastlmm	NC_012874.2	38729796	1.00157e-09	9	G/A	G:326_A:18	0.05
Spike length	fastlmm	NC_012874.2	38730695	1.00157e-09	9	G/A	G:326_A:18	0.05
Spike length	fastlmm	NC_012874.2	38732675	1.00157e-09	9	G/A	G:328_A:18	0.05
Spike length	fastlmm	NC_012874.2	38732774	1.00157e-09	9	G/A	G:326_A:18	0.05
Spike length	fastlmm	NC_012874.2	38735662	1.00157e-09	9	C/T	C:326_T:18	0.05
Spike length	fastlmm	NC_012874.2	38738358	1.00157e-09	9	G/A	G:326_A:18	0.05
Spike length	fastlmm	NC_012874.2	23452699	1.00241e-09	9	C/T	C:328_T:18	0.05
Spike length	fastlmm	NC_012874.2	38821997	1.0424e-09	8.98	C/T	C:326_T:18	0.05
Spike length	fastlmm	NC_012874.2	38247502	1.05043e-09	8.98	T/C	T:332_C:18	0.05
Spike length	fastlmm	NC_012874.2	23437076	1.06111e-09	8.97	G/A	G:340_A:18	0.05
Spike length	fastlmm	NC_012874.2	33251698	1.09964e-09	8.96	C/T	C:326_T:18	0.05
Spike length	fastlmm	NC_012879.2	57286985	1.18472e-09	8.93	T/C	T:328_C:18	0.05
Spike length	fastlmm	NC_012874.2	26155902	1.2826e-09	8.89	C/T	C:326_T:18	0.05
Spike length	fastlmm	NC_012874.2	38857891	1.53527e-09	8.81	C/T	C:330_T:18	0.05
Spike length	fastlmm	NC_012874.2	32073376	1.6094e-09	8.79	A/G	A:330_G:18	0.05
Spike length	fastlmm	NC_012874.2	35049366	1.63465e-09	8.79	C/A	C:404_A:22	0.05
Spike length	fastlmm	NC_012874.2	37680718	1.80458e-09	8.74	T/C	T:326_C:20	0.06
Spike length	fastlmm	NC_012879.2	57287788	1.89632e-09	8.72	C/T	C:332_T:18	0.05
Spike length	fastlmm	NC_012871.2	45906431	2.00221e-09	8.7	G/A	G:406_A:22	0.05
Spike length	fastlmm	NC_012876.2	2341654	2.07315e-09	8.68	C/G	C:406_G:22	0.05
Spike length	fastlmm	NC_012876.2	2316449	2.07315e-09	8.68	C/T	C:404_T:24	0.06
Spike length	fastlmm	NC_012874.2	24670062	2.16497e-09	8.66	C/T	C:399_T:21	0.05
Spike length	fastlmm	NC_012874.2	30996897	2.68638e-09	8.57	G/A	G:327_A:19	0.05
Spike length	fastlmm	NC_012874.2	37828270	2.94165e-09	8.53	T/A	T:335_A:19	0.05
Spike length	fastlmm	NC_012871.2	15557535	3.29352e-09	8.48	G/A	G:402_A:24	0.06
Spike length	fastlmm	NC_012871.2	19511724	3.40736e-09	8.47	A/T	A:406_T:22	0.05
Spike length	fastlmm	NC_012876.2	30772937	3.41245e-09	8.47	A/G	A:217_G:211	0.49
Spike length	fastlmm	NC_012876.2	30772912	3.41245e-09	8.47	G/A	G:217_A:211	0.49
Spike length	fastlmm	NC_012871.2	15474975	3.57718e-09	8.45	C/T	C:403_T:25	0.06
Spike length	fastlmm	NC_012871.2	15559548	3.57718e-09	8.45	T/C	T:403_C:25	0.06
Spike length	fastlmm	NC_012871.2	15584590	3.57718e-09	8.45	A/G	A:404_G:24	0.06
Spike length	fastlmm	NC_012871.2	15586234	3.57718e-09	8.45	T/C	T:404_C:24	0.06
Spike length	fastlmm	NC_012871.2	15839247	3.57718e-09	8.45	G/A	G:404_A:24	0.06
Spike length	fastlmm	NC_012874.2	38898723	4.39115e-09	8.36	A/G	A:325_G:19	0.06
Spike length	fastlmm	NC_012874.2	37824007	4.56496e-09	8.34	T/G	T:327_G:19	0.05
Spike length	fastlmm	NC_012874.2	37829738	4.56496e-09	8.34	C/G	C:327_G:19	0.05
Spike length	fastlmm	NC_012874.2	37829746	4.56496e-09	8.34	A/G	A:327_G:19	0.05
Spike length	fastlmm	NC_012874.2	38787871	4.56496e-09	8.34	G/C	G:325_C:19	0.06
Spike length	fastlmm	NC_012874.2	29243038	5.02721e-09	8.3	C/T	C:335_T:19	0.05
Spike length	fastlmm	NC_012874.2	38788090	5.15081e-09	8.29	G/C	G:335_C:19	0.05
Spike length	fastlmm	NC_012870.2	63842502	5.27291e-09	8.28	C/G	C:390_G:26	0.06
Spike length	fastlmm	NC_012878.2	46336905	5.51289e-09	8.26	G/A	G:402_A:22	0.05
Spike length	fastlmm	NC_012874.2	58409159	5.6512e-09	8.25	C/T	C:401_T:25	0.06
Spike length	fastlmm	NC_012876.2	65413118	5.67449e-09	8.25	A/C	A:366_C:20	0.05
Spike length	fastlmm	NC_012876.2	65423626	5.67449e-09	8.25	G/A	G:366_A:20	0.05
Spike length	fastlmm	NC_012876.2	65414971	5.67449e-09	8.25	T/A	T:366_A:20	0.05
Spike length	fastlmm	NC_012874.2	37677464	6.05541e-09	8.22	G/A	G:325_A:19	0.06
Spike length	fastlmm	NC_012870.2	64052522	6.06371e-09	8.22	T/G	T:402_G:22	0.05
Spike length	fastlmm	NC_012876.2	65411913	6.99942e-09	8.15	C/T	C:364_T:20	0.05
Spike length	fastlmm	NC_012874.2	4396106	7.50028e-09	8.12	C/T	C:375_T:21	0.05
Spike length	fastlmm	NC_012874.2	57730038	7.53724e-09	8.12	T/C	T:341_C:19	0.05
Spike length	fastlmm	NC_012870.2	21898960	7.54061e-09	8.12	T/A	T:403_A:23	0.05
Spike length	fastlmm	NC_012870.2	63975172	7.7034e-09	8.11	G/A	G:391_A:21	0.05
Spike length	fastlmm	NC_012876.2	65423804	8.20447e-09	8.09	G/A	G:364_A:20	0.05
Spike length	fastlmm	NC_012876.2	2351828	8.65981e-09	8.06	A/G	A:401_G:27	0.06
Spike length	fastlmm	NC_012874.2	25488902	8.8678e-09	8.05	G/A	G:207_A:221	0.48
Spike length	fastlmm	NC_012870.2	63976698	8.93279e-09	8.05	T/C	T:387_C:21	0.05
Spike length	fastlmm	NC_012870.2	63974962	9.17915e-09	8.04	C/T	C:395_T:21	0.05
Spike length	fastlmm	NC_012870.2	63975186	9.60444e-09	8.02	T/C	T:387_C:21	0.05
Spike length	fastlmm	NC_012870.2	63911970	9.79277e-09	8.01	T/A	T:357_A:25	0.07
Spike length	fastlmm	NC_012870.2	63974872	1.06632e-08	7.97	C/T	C:389_T:21	0.05
Spike length	fastlmm	NC_012870.2	63975256	1.06632e-08	7.97	C/A	C:389_A:21	0.05
Spike length	fastlmm	NC_012870.2	63975270	1.06632e-08	7.97	A/T	A:389_T:21	0.05
Spike length	fastlmm	NC_012870.2	63975367	1.06632e-08	7.97	C/T	C:389_T:21	0.05
Spike length	fastlmm	NC_012870.2	63975279	1.06633e-08	7.97	T/C	T:389_C:21	0.05
Spike length	fastlmm	NC_012870.2	63975358	1.06633e-08	7.97	T/A	T:389_A:21	0.05
Spike length	fastlmm	NC_012870.2	63975373	1.06633e-08	7.97	G/A	G:389_A:21	0.05
Spike length	fastlmm	NC_012874.2	44926889	1.07497e-08	7.97	C/T	C:331_T:19	0.05
Spike length	fastlmm	NC_012874.2	10584483	1.10744e-08	7.96	G/A	G:403_A:25	0.06
Spike length	fastlmm	NC_012874.2	10584712	1.10744e-08	7.96	A/C	A:403_C:25	0.06
Spike length	fastlmm	NC_012874.2	10584780	1.10744e-08	7.96	C/T	C:403_T:25	0.06
Spike length	fastlmm	NC_012874.2	10584745	1.10744e-08	7.96	G/A	G:403_A:25	0.06
Spike length	fastlmm	NC_012872.2	72466748	1.11541e-08	7.95	A/G	A:398_G:24	0.06
Spike length	fastlmm	NC_012876.2	2345881	1.13443e-08	7.95	C/T	C:399_T:25	0.06
Spike length	fastlmm	NC_012871.2	11450347	1.21652e-08	7.91	G/A	G:330_A:18	0.05
Spike length	fastlmm	NC_012871.2	11452793	1.21652e-08	7.91	C/T	C:330_T:18	0.05
Spike length	fastlmm	NC_012871.2	11452911	1.21652e-08	7.91	G/A	G:330_A:18	0.05
Spike length	fastlmm	NC_012870.2	63941014	1.24789e-08	7.9	C/T	C:406_T:22	0.05
Spike length	fastlmm	NC_012876.2	2343542	1.25737e-08	7.9	A/C	A:401_C:25	0.06
Spike length	fastlmm	NC_012871.2	13324166	1.26889e-08	7.9	G/A	G:384_A:24	0.06
Spike length	fastlmm	NC_012876.2	2345660	1.3176e-08	7.88	C/G	C:397_G:23	0.05
Spike length	fastlmm	NC_012874.2	28953447	1.38805e-08	7.86	C/A	C:330_A:20	0.06
Spike length	fastlmm	NC_012876.2	2342159	1.43247e-08	7.84	A/C	A:403_C:23	0.05
Spike length	fastlmm	NC_012878.2	693128	1.46352e-08	7.83	G/C	G:340_C:26	0.07
Spike length	fastlmm	NC_012876.2	2318242	1.47894e-08	7.83	T/G	T:393_G:25	0.06
Spike length	fastlmm	NC_012876.2	2342668	1.50643e-08	7.82	T/C	T:363_C:25	0.06
Spike length	fastlmm	NC_012876.2	40707762	1.51203e-08	7.82	C/A	C:215_A:211	0.5
Spike length	fastlmm	NC_012876.2	2324732	1.52507e-08	7.82	C/T	C:399_T:27	0.06
Spike length	fastlmm	NC_012874.2	38140209	1.5484e-08	7.81	A/G	A:331_G:19	0.05
Spike length	fastlmm	NC_012874.2	37785431	1.60627e-08	7.79	A/T	A:325_T:19	0.06
Spike length	fastlmm	NC_012876.2	2322747	1.60912e-08	7.79	G/A	G:403_A:25	0.06
Spike length	fastlmm	NC_012876.2	2325366	1.60912e-08	7.79	C/G	C:401_G:27	0.06
Spike length	fastlmm	NC_012876.2	2326592	1.60912e-08	7.79	A/T	A:401_T:27	0.06
Spike length	fastlmm	NC_012876.2	2351838	1.60912e-08	7.79	G/A	G:405_A:23	0.05
Spike length	fastlmm	NC_012876.2	2345940	1.61999e-08	7.79	A/T	A:399_T:25	0.06
Spike length	fastlmm	NC_012874.2	47112093	1.65464e-08	7.78	C/T	C:224_T:204	0.48
Spike length	fastlmm	NC_012871.2	14950125	1.70272e-08	7.77	T/G	T:391_G:33	0.08
Spike length	fastlmm	NC_012876.2	2350138	1.72835e-08	7.76	C/T	C:401_T:23	0.05
Spike length	fastlmm	NC_012876.2	2345791	1.73657e-08	7.76	C/G	C:391_G:23	0.06
Spike length	fastlmm	NC_012874.2	13127772	1.75197e-08	7.76	G/T	G:406_T:22	0.05
Spike length	fastlmm	NC_012874.2	38909901	1.77595e-08	7.75	T/C	T:325_C:21	0.06
Spike length	fastlmm	NC_012874.2	28038205	1.81037e-08	7.74	C/T	C:329_T:19	0.05
Spike length	fastlmm	NC_012876.2	2343483	1.90988e-08	7.72	T/C	T:401_C:25	0.06
Spike length	fastlmm	NC_012876.2	56178797	1.9111e-08	7.72	C/T	C:377_T:25	0.06
Spike length	fastlmm	NC_012876.2	37202380	1.97502e-08	7.7	G/A	G:210_A:218	0.49
Spike length	fastlmm	NC_012874.2	37857705	2.1253e-08	7.67	C/G	C:326_G:18	0.05
Spike length	fastlmm	NC_012876.2	16247657	2.18421e-08	7.66	C/A	C:318_A:38	0.11
Spike length	fastlmm	NC_012873.2	65215666	2.26826e-08	7.64	A/C	A:334_C:18	0.05
Spike length	fastlmm	NC_012874.2	28140666	2.50887e-08	7.6	G/A	G:333_A:19	0.05
Spike length	fastlmm	NC_012874.2	38064863	2.65628e-08	7.58	T/A	T:318_A:28	0.08
Spike length	fastlmm	NC_012874.2	58778631	2.76975e-08	7.56	G/A	G:400_A:26	0.06
Spike length	fastlmm	NC_012874.2	24206421	2.77517e-08	7.56	C/T	C:367_T:61	0.14
Spike length	fastlmm	NC_012874.2	46130677	2.93496e-08	7.53	T/C	T:403_C:23	0.05
Spike length	fastlmm	NC_012870.2	64841119	2.97087e-08	7.53	T/A	T:399_A:27	0.06
Spike length	fastlmm	NC_012874.2	28030681	3.13885e-08	7.5	C/T	C:327_T:19	0.05
Spike length	fastlmm	NC_012871.2	20098432	3.15539e-08	7.5	G/A	G:404_A:22	0.05
Spike length	fastlmm	NC_012870.2	64836361	3.1644e-08	7.5	T/A	T:397_A:27	0.06
Spike length	fastlmm	NC_012874.2	38936171	3.23089e-08	7.49	T/A	T:347_A:19	0.05

## Sheet: Number of internodes
Trait	Model	Chr	Pos	Pvalue	'-log10P	Allele	Count	MAF

## Sheet: 100-grain weight
Trait	Model	Chr	Pos	Pvalue	'-log10P	Allele	Count	MAF
