# Supplementary material for: The Identification of a Yield-Related Gene Controlling Multiple Traits Using GWAS in Sorghum (Sorghum bicolor L.)
Source: Plants (Basel). 2023 Apr 4;12(7):1557. doi: 10.3390/plants12071557 (PMC10097259; doi:10.3390/plants12071557)
Supplement: Supplementary file 1 [file plants-12-01557-s001.zip › Table S7.xlsx]

## Sheet: Heading date
Table S7 The analysis of SNPs which exceeded threshold using the lmm model.
Trait	Model	Chr	Pos	Pvalue	'-log10P	Allele	Count	MAF
Heading date	lmm	NC_012875.2	5979555	2.94802e-10	9.53	C/G	C:398_G:30	0.07
Heading date	lmm	NC_012875.2	5979863	3.28783e-10	9.48	T/C	T:396_C:30	0.07
Heading date	lmm	NC_012875.2	5982356	5.54065e-09	8.26	G/C	G:402_C:26	0.06

## Sheet: Plant height
Trait	Model	Chr	Pos	Pvalue	'-log10P	Allele	Count	MAF
Plant height	lmm	NC_012874.2	1992075	2.49515e-08	7.6	T/A	T:373_A:49	0.12
Plant height	lmm	NC_012873.2	14278827	8.78496e-09	8.06	C/T	C:404_T:22	0.05
Plant height	lmm	NC_012872.2	45044035	2.90547e-08	7.54	T/C	T:397_C:31	0.07

## Sheet: Spike type
Trait	Model	Chr	Pos	Pvalue	'-log10P	Allele	Count	MAF
Spike type	lmm	NC_012874.2	57883609	1.85001e-09	8.73	C/T	C:366_T:46	0.11
Spike type	lmm	NC_012874.2	69889266	1.72796e-08	7.76	C/T	C:322_T:36	0.1
Spike type	lmm	NC_012874.2	69894056	5.11202e-09	8.29	T/C	T:312_C:60	0.16
Spike type	lmm	NC_012874.2	69898307	2.17112e-08	7.66	G/A	G:385_A:37	0.09
Spike type	lmm	NC_012874.2	69901863	1.00147e-08	8	C/T	C:388_T:34	0.08

## Sheet: Spike length
Trait	Model	Chr	Pos	Pvalue	'-log10P	Allele	Count	MAF
Spike length	lmm	NC_012878.2	693128	1.0048e-08	8	G/C	G:340_C:26	0.07
Spike length	lmm	NC_012871.2	916780	7.48631e-09	8.13	T/C	T:220_C:208	0.49
Spike length	lmm	NC_012871.2	916984	7.48631e-09	8.13	C/G	C:220_G:208	0.49
Spike length	lmm	NC_012871.2	917064	7.48631e-09	8.13	C/G	C:220_G:208	0.49
Spike length	lmm	NC_012876.2	2314651	1.17789e-08	7.93	G/T	G:402_T:26	0.06
Spike length	lmm	NC_012876.2	2316449	2.37821e-10	9.62	C/T	C:404_T:24	0.06
Spike length	lmm	NC_012876.2	2318242	1.64242e-09	8.78	T/G	T:393_G:25	0.06
Spike length	lmm	NC_012876.2	2322747	1.79955e-09	8.74	G/A	G:403_A:25	0.06
Spike length	lmm	NC_012876.2	2324732	1.68493e-09	8.77	C/T	C:399_T:27	0.06
Spike length	lmm	NC_012876.2	2325366	1.79955e-09	8.74	C/G	C:401_G:27	0.06
Spike length	lmm	NC_012876.2	2326592	1.79955e-09	8.74	A/T	A:401_T:27	0.06
Spike length	lmm	NC_012876.2	2341654	2.37821e-10	9.62	C/G	C:406_G:22	0.05
Spike length	lmm	NC_012876.2	2342159	1.59004e-09	8.8	A/C	A:403_C:23	0.05
Spike length	lmm	NC_012876.2	2342668	1.69001e-09	8.77	T/C	T:363_C:25	0.06
Spike length	lmm	NC_012876.2	2343483	2.13997e-09	8.67	T/C	T:401_C:25	0.06
Spike length	lmm	NC_012876.2	2343542	1.38324e-09	8.86	A/C	A:401_C:25	0.06
Spike length	lmm	NC_012876.2	2345660	1.46038e-09	8.84	C/G	C:397_G:23	0.05
Spike length	lmm	NC_012876.2	2345791	2.63609e-09	8.58	C/G	C:391_G:23	0.06
Spike length	lmm	NC_012876.2	2345881	1.26053e-09	8.9	C/T	C:399_T:25	0.06
Spike length	lmm	NC_012876.2	2345940	1.80538e-09	8.74	A/T	A:399_T:25	0.06
Spike length	lmm	NC_012876.2	2350138	1.97669e-09	8.7	C/T	C:401_T:23	0.05
Spike length	lmm	NC_012876.2	2351828	1.55777e-09	8.81	A/G	A:401_G:27	0.06
Spike length	lmm	NC_012876.2	2351838	1.79955e-09	8.74	G/A	G:405_A:23	0.05
Spike length	lmm	NC_012876.2	2385974	2.34373e-08	7.63	C/T	C:404_T:24	0.06
Spike length	lmm	NC_012876.2	2396561	2.02518e-08	7.69	G/C	G:404_C:22	0.05
Spike length	lmm	NC_012876.2	2398871	2.18212e-08	7.66	G/A	G:398_A:22	0.05
Spike length	lmm	NC_012876.2	2399810	2.34373e-08	7.63	G/A	G:406_A:22	0.05
Spike length	lmm	NC_012876.2	2404331	3.13173e-08	7.5	C/A	C:402_A:22	0.05
Spike length	lmm	NC_012876.2	2407496	2.34373e-08	7.63	G/A	G:406_A:22	0.05
Spike length	lmm	NC_012874.2	4051951	1.54071e-11	10.81	G/A	G:338_A:18	0.05
Spike length	lmm	NC_012874.2	4054791	1.10651e-11	10.96	A/T	A:340_T:18	0.05
Spike length	lmm	NC_012874.2	4396106	1.00808e-09	9	C/T	C:375_T:21	0.05
Spike length	lmm	NC_012874.2	5485446	5.28515e-09	8.28	G/A	G:355_A:19	0.05
Spike length	lmm	NC_012878.2	5673051	7.48631e-09	8.13	A/G	A:220_G:208	0.49
Spike length	lmm	NC_012877.2	6655943	2.45141e-08	7.61	G/A	G:345_A:19	0.05
Spike length	lmm	NC_012877.2	6671067	1.55706e-08	7.81	G/A	G:343_A:19	0.05
Spike length	lmm	NC_012877.2	6677553	2.93426e-08	7.53	G/A	G:361_A:19	0.05
Spike length	lmm	NC_012871.2	7927730	1.81206e-08	7.74	T/C	T:398_C:22	0.05
Spike length	lmm	NC_012871.2	8085436	2.19189e-08	7.66	T/C	T:406_C:22	0.05
Spike length	lmm	NC_012871.2	8548919	2.93234e-11	10.53	C/T	C:344_T:24	0.07
Spike length	lmm	NC_012871.2	8700286	1.02662e-08	7.99	A/C	A:357_C:19	0.05
Spike length	lmm	NC_012871.2	8700455	1.06697e-08	7.97	G/C	G:351_C:19	0.05
Spike length	lmm	NC_012871.2	8700580	1.02662e-08	7.99	C/T	C:357_T:19	0.05
Spike length	lmm	NC_012871.2	8700593	1.07688e-08	7.97	G/A	G:355_A:19	0.05
Spike length	lmm	NC_012871.2	8700697	1.02662e-08	7.99	G/A	G:357_A:19	0.05
Spike length	lmm	NC_012871.2	8750408	3.08392e-11	10.51	G/A	G:357_A:19	0.05
Spike length	lmm	NC_012871.2	9076953	5.91894e-11	10.23	T/C	T:403_C:25	0.06
Spike length	lmm	NC_012871.2	9077035	7.51293e-09	8.12	T/C	T:402_C:24	0.06
Spike length	lmm	NC_012871.2	9077538	6.13038e-11	10.21	A/G	A:401_G:25	0.06
Spike length	lmm	NC_012871.2	9077944	8.05806e-12	11.09	A/G	A:399_G:23	0.05
Spike length	lmm	NC_012873.2	9859305	2.032e-08	7.69	C/G	C:355_G:23	0.06
Spike length	lmm	NC_012877.2	10094826	7.48631e-09	8.13	G/A	G:221_A:207	0.48
Spike length	lmm	NC_012877.2	10095356	7.48631e-09	8.13	C/T	C:221_T:207	0.48
Spike length	lmm	NC_012877.2	10095592	7.48631e-09	8.13	G/A	G:220_A:208	0.49
Spike length	lmm	NC_012877.2	10095603	7.48631e-09	8.13	G/C	G:220_C:208	0.49
Spike length	lmm	NC_012877.2	10096618	7.48631e-09	8.13	G/A	G:220_A:208	0.49
Spike length	lmm	NC_012874.2	10584483	3.83058e-09	8.42	G/A	G:403_A:25	0.06
Spike length	lmm	NC_012874.2	10584712	3.83058e-09	8.42	A/C	A:403_C:25	0.06
Spike length	lmm	NC_012874.2	10584745	3.83058e-09	8.42	G/A	G:403_A:25	0.06
Spike length	lmm	NC_012874.2	10584780	3.83058e-09	8.42	C/T	C:403_T:25	0.06
Spike length	lmm	NC_012871.2	11450347	1.82078e-09	8.74	G/A	G:330_A:18	0.05
Spike length	lmm	NC_012871.2	11452793	1.82078e-09	8.74	C/T	C:330_T:18	0.05
Spike length	lmm	NC_012871.2	11452911	1.82078e-09	8.74	G/A	G:330_A:18	0.05
Spike length	lmm	NC_012871.2	11557052	1.00413e-10	10	G/A	G:334_A:18	0.05
Spike length	lmm	NC_012879.2	12219209	2.94972e-11	10.53	A/G	A:209_G:219	0.49
Spike length	lmm	NC_012879.2	12219282	1.1606e-08	7.94	G/A	G:207_A:221	0.48
Spike length	lmm	NC_012879.2	12220377	1.1606e-08	7.94	T/C	T:207_C:221	0.48
Spike length	lmm	NC_012879.2	12220406	1.1606e-08	7.94	T/C	T:207_C:221	0.48
Spike length	lmm	NC_012879.2	12220598	1.1606e-08	7.94	A/T	A:208_T:220	0.49
Spike length	lmm	NC_012879.2	12220680	1.1606e-08	7.94	A/T	A:207_T:221	0.48
Spike length	lmm	NC_012875.2	12266964	3.46443e-08	7.46	C/T	C:403_T:23	0.05
Spike length	lmm	NC_012874.2	13127772	1.62581e-09	8.79	G/T	G:406_T:22	0.05
Spike length	lmm	NC_012871.2	13324166	3.83077e-09	8.42	G/A	G:384_A:24	0.06
Spike length	lmm	NC_012871.2	13445899	4.34403e-11	10.36	T/C	T:338_C:18	0.05
Spike length	lmm	NC_012871.2	14950125	2.58597e-08	7.59	T/G	T:391_G:33	0.08
Spike length	lmm	NC_012871.2	15474975	6.96673e-10	9.16	C/T	C:403_T:25	0.06
Spike length	lmm	NC_012871.2	15557535	6.40124e-10	9.19	G/A	G:402_A:24	0.06
Spike length	lmm	NC_012871.2	15559548	6.96673e-10	9.16	T/C	T:403_C:25	0.06
Spike length	lmm	NC_012871.2	15584590	6.96673e-10	9.16	A/G	A:404_G:24	0.06
Spike length	lmm	NC_012871.2	15586234	6.96673e-10	9.16	T/C	T:404_C:24	0.06
Spike length	lmm	NC_012879.2	15729071	2.61749e-08	7.58	C/T	C:396_T:22	0.05
Spike length	lmm	NC_012871.2	15839247	6.96673e-10	9.16	G/A	G:404_A:24	0.06
Spike length	lmm	NC_012874.2	16214479	4.3724e-11	10.36	C/A	C:334_A:18	0.05
Spike length	lmm	NC_012874.2	16221117	2.31855e-08	7.63	C/T	C:325_T:19	0.06
Spike length	lmm	NC_012876.2	16247657	9.04461e-09	8.04	C/A	C:318_A:38	0.11
Spike length	lmm	NC_012871.2	16380992	1.03116e-12	11.99	G/A	G:368_A:22	0.06
Spike length	lmm	NC_012874.2	19447334	1.2731e-08	7.9	G/A	G:325_A:19	0.06
Spike length	lmm	NC_012871.2	19511724	3.77803e-10	9.42	A/T	A:406_T:22	0.05
Spike length	lmm	NC_012871.2	20098432	5.30504e-09	8.28	G/A	G:404_A:22	0.05
Spike length	lmm	NC_012871.2	20099247	6.40409e-09	8.19	C/T	C:402_T:22	0.05
Spike length	lmm	NC_012871.2	20100368	1.80469e-11	10.74	T/C	T:406_C:22	0.05
Spike length	lmm	NC_012876.2	20301116	7.48631e-09	8.13	A/G	A:220_G:208	0.49
Spike length	lmm	NC_012878.2	21091487	7.48631e-09	8.13	A/G	A:220_G:208	0.49
Spike length	lmm	NC_012874.2	21093169	8.72482e-11	10.06	G/A	G:326_A:18	0.05
Spike length	lmm	NC_012874.2	21535776	8.72482e-11	10.06	C/T	C:326_T:18	0.05
Spike length	lmm	NC_012874.2	21838312	8.72482e-11	10.06	A/C	A:326_C:18	0.05
Spike length	lmm	NC_012870.2	21898960	4.79223e-09	8.32	T/A	T:403_A:23	0.05
Spike length	lmm	NC_012874.2	22287746	8.72482e-11	10.06	G/A	G:326_A:18	0.05
Spike length	lmm	NC_012874.2	22287809	8.00115e-11	10.1	A/G	A:330_G:18	0.05
Spike length	lmm	NC_012874.2	22290002	8.58461e-11	10.07	A/G	A:330_G:18	0.05
Spike length	lmm	NC_012874.2	22290026	8.58461e-11	10.07	C/A	C:328_A:18	0.05
Spike length	lmm	NC_012874.2	22290489	6.76079e-11	10.17	G/A	G:330_A:18	0.05
Spike length	lmm	NC_012874.2	22290731	5.67276e-11	10.25	T/C	T:336_C:18	0.05
Spike length	lmm	NC_012874.2	22291757	9.70802e-11	10.01	T/C	T:330_C:18	0.05
Spike length	lmm	NC_012874.2	22292320	8.72482e-11	10.06	G/A	G:330_A:18	0.05
Spike length	lmm	NC_012874.2	22334095	8.72482e-11	10.06	C/T	C:330_T:18	0.05
Spike length	lmm	NC_012874.2	22334104	8.72482e-11	10.06	C/T	C:330_T:18	0.05
Spike length	lmm	NC_012874.2	22334114	8.72482e-11	10.06	G/A	G:330_A:18	0.05
Spike length	lmm	NC_012874.2	22334450	8.72482e-11	10.06	C/T	C:328_T:18	0.05
Spike length	lmm	NC_012874.2	22335352	8.72482e-11	10.06	G/C	G:328_C:18	0.05
Spike length	lmm	NC_012874.2	22335505	8.72482e-11	10.06	G/A	G:328_A:18	0.05
Spike length	lmm	NC_012874.2	22336077	8.72482e-11	10.06	G/A	G:328_A:18	0.05
Spike length	lmm	NC_012874.2	22336104	8.72482e-11	10.06	C/G	C:328_G:18	0.05
Spike length	lmm	NC_012874.2	22336338	8.72482e-11	10.06	C/T	C:328_T:18	0.05
Spike length	lmm	NC_012874.2	22336460	8.03902e-11	10.09	T/A	T:326_A:18	0.05
Spike length	lmm	NC_012874.2	22336507	1.09805e-10	9.96	C/A	C:326_A:18	0.05
Spike length	lmm	NC_012874.2	22336664	8.72482e-11	10.06	T/A	T:328_A:18	0.05
Spike length	lmm	NC_012874.2	22336977	8.72482e-11	10.06	C/A	C:330_A:18	0.05
Spike length	lmm	NC_012874.2	22337225	8.72482e-11	10.06	G/C	G:330_C:18	0.05
Spike length	lmm	NC_012874.2	22337308	8.72482e-11	10.06	G/A	G:328_A:18	0.05
Spike length	lmm	NC_012874.2	22337339	8.72482e-11	10.06	C/T	C:328_T:18	0.05
Spike length	lmm	NC_012874.2	22337552	8.53753e-11	10.07	C/A	C:326_A:18	0.05
Spike length	lmm	NC_012874.2	22337728	8.72482e-11	10.06	C/T	C:326_T:18	0.05
Spike length	lmm	NC_012874.2	22406566	6.70787e-11	10.17	C/T	C:326_T:18	0.05
Spike length	lmm	NC_012874.2	22406791	6.43928e-11	10.19	A/T	A:328_T:18	0.05
Spike length	lmm	NC_012874.2	22407949	8.72482e-11	10.06	T/A	T:328_A:18	0.05
Spike length	lmm	NC_012874.2	22408654	8.72482e-11	10.06	G/T	G:328_T:18	0.05
Spike length	lmm	NC_012874.2	22408984	8.72482e-11	10.06	G/A	G:328_A:18	0.05
Spike length	lmm	NC_012874.2	22409115	8.72482e-11	10.06	G/A	G:330_A:18	0.05
Spike length	lmm	NC_012874.2	22409186	8.72482e-11	10.06	C/T	C:328_T:18	0.05
Spike length	lmm	NC_012874.2	22409570	8.72482e-11	10.06	G/T	G:330_T:18	0.05
Spike length	lmm	NC_012877.2	22478884	7.48631e-09	8.13	A/G	A:220_G:208	0.49
Spike length	lmm	NC_012874.2	22487375	3.932e-11	10.41	G/T	G:326_T:18	0.05
Spike length	lmm	NC_012874.2	22488386	5.82189e-11	10.23	A/G	A:326_G:18	0.05
Spike length	lmm	NC_012874.2	22491282	5.82189e-11	10.23	G/T	G:326_T:18	0.05
Spike length	lmm	NC_012874.2	22492674	6.85096e-11	10.16	T/A	T:330_A:18	0.05
Spike length	lmm	NC_012874.2	22735562	3.72148e-11	10.43	T/C	T:332_C:18	0.05
Spike length	lmm	NC_012874.2	22945302	9.32102e-13	12.03	C/T	C:330_T:20	0.06
Spike length	lmm	NC_012874.2	23222043	6.75242e-11	10.17	G/T	G:336_T:18	0.05
Spike length	lmm	NC_012874.2	23223982	6.57862e-11	10.18	T/C	T:326_C:18	0.05
Spike length	lmm	NC_012874.2	23422715	6.40529e-11	10.19	G/T	G:328_T:18	0.05
Spike length	lmm	NC_012874.2	23423085	8.72482e-11	10.06	C/T	C:328_T:18	0.05
Spike length	lmm	NC_012874.2	23423398	8.72482e-11	10.06	G/T	G:330_T:18	0.05
Spike length	lmm	NC_012874.2	23423409	8.72482e-11	10.06	C/T	C:330_T:18	0.05
Spike length	lmm	NC_012874.2	23423753	7.19891e-11	10.14	C/A	C:336_A:18	0.05
Spike length	lmm	NC_012874.2	23424433	1.01334e-10	9.99	C/T	C:334_T:18	0.05
Spike length	lmm	NC_012874.2	23425345	8.72482e-11	10.06	G/A	G:330_A:18	0.05
Spike length	lmm	NC_012874.2	23426759	8.72482e-11	10.06	G/A	G:328_A:18	0.05
Spike length	lmm	NC_012874.2	23427467	6.76079e-11	10.17	C/A	C:330_A:18	0.05
Spike length	lmm	NC_012874.2	23427530	1.13515e-10	9.94	C/T	C:332_T:18	0.05
Spike length	lmm	NC_012874.2	23428235	6.91983e-11	10.16	G/A	G:330_A:18	0.05
Spike length	lmm	NC_012874.2	23432232	9.49783e-11	10.02	G/A	G:326_A:18	0.05
Spike length	lmm	NC_012874.2	23433477	8.00115e-11	10.1	C/T	C:330_T:18	0.05
Spike length	lmm	NC_012874.2	23435753	8.8469e-11	10.05	C/A	C:326_A:18	0.05
Spike length	lmm	NC_012874.2	23435937	8.41274e-11	10.08	G/C	G:326_C:18	0.05
Spike length	lmm	NC_012874.2	23436153	4.97026e-11	10.3	T/C	T:332_C:18	0.05
Spike length	lmm	NC_012874.2	23436508	9.28183e-11	10.03	C/A	C:334_A:18	0.05
Spike length	lmm	NC_012874.2	23437076	1.56173e-10	9.81	G/A	G:340_A:18	0.05
Spike length	lmm	NC_012874.2	23438532	8.72482e-11	10.06	C/T	C:330_T:18	0.05
Spike length	lmm	NC_012874.2	23439839	8.72482e-11	10.06	G/A	G:330_A:18	0.05
Spike length	lmm	NC_012874.2	23439851	8.72482e-11	10.06	G/A	G:330_A:18	0.05
Spike length	lmm	NC_012874.2	23440031	8.72482e-11	10.06	G/A	G:328_A:18	0.05
Spike length	lmm	NC_012874.2	23440670	8.00115e-11	10.1	C/T	C:330_T:18	0.05
Spike length	lmm	NC_012874.2	23441637	8.72482e-11	10.06	G/A	G:326_A:18	0.05
Spike length	lmm	NC_012874.2	23441725	1.07771e-10	9.97	G/A	G:326_A:18	0.05
Spike length	lmm	NC_012874.2	23441765	8.72482e-11	10.06	T/C	T:326_C:18	0.05
Spike length	lmm	NC_012874.2	23442651	8.72482e-11	10.06	A/G	A:328_G:18	0.05
Spike length	lmm	NC_012874.2	23443631	8.00115e-11	10.1	G/A	G:330_A:18	0.05
Spike length	lmm	NC_012874.2	23446017	8.72482e-11	10.06	C/T	C:326_T:18	0.05
Spike length	lmm	NC_012874.2	23446043	7.04024e-11	10.15	G/A	G:328_A:18	0.05
Spike length	lmm	NC_012874.2	23447200	9.58952e-11	10.02	T/C	T:332_C:18	0.05
Spike length	lmm	NC_012874.2	23447281	9.58952e-11	10.02	C/T	C:332_T:18	0.05
Spike length	lmm	NC_012874.2	23447691	8.72482e-11	10.06	G/C	G:328_C:18	0.05
Spike length	lmm	NC_012874.2	23452699	1.48543e-10	9.83	C/T	C:328_T:18	0.05
Spike length	lmm	NC_012874.2	23453359	8.72482e-11	10.06	G/T	G:330_T:18	0.05
Spike length	lmm	NC_012874.2	23455051	8.72482e-11	10.06	G/A	G:328_A:18	0.05
Spike length	lmm	NC_012874.2	23457096	8.72482e-11	10.06	T/G	T:326_G:18	0.05
Spike length	lmm	NC_012874.2	23457243	8.72482e-11	10.06	T/C	T:326_C:18	0.05
Spike length	lmm	NC_012874.2	23457327	8.72482e-11	10.06	G/C	G:330_C:18	0.05
Spike length	lmm	NC_012874.2	23458020	8.72482e-11	10.06	C/T	C:330_T:18	0.05
Spike length	lmm	NC_012874.2	23458033	8.72482e-11	10.06	T/A	T:328_A:18	0.05
Spike length	lmm	NC_012874.2	23458283	8.72482e-11	10.06	G/A	G:330_A:18	0.05
Spike length	lmm	NC_012874.2	23459081	7.89326e-11	10.1	A/C	A:332_C:18	0.05
Spike length	lmm	NC_012874.2	23460104	8.72482e-11	10.06	C/T	C:328_T:18	0.05
Spike length	lmm	NC_012874.2	23460339	8.72482e-11	10.06	C/T	C:328_T:18	0.05
Spike length	lmm	NC_012874.2	23462215	8.72482e-11	10.06	G/A	G:330_A:18	0.05
Spike length	lmm	NC_012874.2	23463126	8.72482e-11	10.06	G/C	G:326_C:18	0.05
Spike length	lmm	NC_012874.2	23463826	8.75104e-11	10.06	C/T	C:326_T:18	0.05
Spike length	lmm	NC_012874.2	23463920	8.75104e-11	10.06	A/G	A:328_G:18	0.05
Spike length	lmm	NC_012874.2	23464490	8.72482e-11	10.06	A/G	A:328_G:18	0.05
Spike length	lmm	NC_012874.2	23464772	8.72482e-11	10.06	G/A	G:328_A:18	0.05
Spike length	lmm	NC_012874.2	23465011	8.72482e-11	10.06	C/G	C:330_G:18	0.05
Spike length	lmm	NC_012874.2	23465059	8.28567e-11	10.08	G/T	G:326_T:18	0.05
Spike length	lmm	NC_012874.2	23465202	8.72482e-11	10.06	C/T	C:328_T:18	0.05
Spike length	lmm	NC_012874.2	23465388	9.58952e-11	10.02	A/T	A:332_T:18	0.05
Spike length	lmm	NC_012874.2	23467473	8.72482e-11	10.06	C/T	C:326_T:18	0.05
Spike length	lmm	NC_012874.2	23467982	8.72482e-11	10.06	G/T	G:330_T:18	0.05
Spike length	lmm	NC_012874.2	23468764	8.35817e-11	10.08	G/A	G:328_A:18	0.05
Spike length	lmm	NC_012874.2	23468943	1.34372e-10	9.87	G/A	G:336_A:18	0.05
Spike length	lmm	NC_012874.2	23469136	8.99676e-11	10.05	G/A	G:332_A:18	0.05
Spike length	lmm	NC_012874.2	23469350	8.72482e-11	10.06	T/G	T:328_G:18	0.05
Spike length	lmm	NC_012874.2	23469378	7.80118e-11	10.11	G/A	G:326_A:18	0.05
Spike length	lmm	NC_012874.2	23469443	8.72482e-11	10.06	C/T	C:328_T:18	0.05
Spike length	lmm	NC_012874.2	23469921	8.72482e-11	10.06	G/T	G:328_T:18	0.05
Spike length	lmm	NC_012874.2	23469974	8.72482e-11	10.06	C/A	C:328_A:18	0.05
Spike length	lmm	NC_012874.2	23471712	8.00115e-11	10.1	G/A	G:332_A:18	0.05
Spike length	lmm	NC_012874.2	23471871	7.18599e-11	10.14	G/T	G:328_T:18	0.05
Spike length	lmm	NC_012874.2	23473089	8.72482e-11	10.06	G/A	G:326_A:18	0.05
Spike length	lmm	NC_012874.2	23474179	7.78521e-11	10.11	G/A	G:326_A:18	0.05
Spike length	lmm	NC_012874.2	23474186	8.72482e-11	10.06	T/G	T:328_G:18	0.05
Spike length	lmm	NC_012874.2	23475765	8.72482e-11	10.06	C/T	C:326_T:18	0.05
Spike length	lmm	NC_012874.2	23475849	7.89326e-11	10.1	C/T	C:330_T:18	0.05
Spike length	lmm	NC_012874.2	23476382	8.72482e-11	10.06	C/T	C:330_T:18	0.05
Spike length	lmm	NC_012874.2	23476420	8.53753e-11	10.07	C/T	C:326_T:18	0.05
Spike length	lmm	NC_012874.2	23477443	7.40957e-11	10.13	T/G	T:326_G:18	0.05
Spike length	lmm	NC_012874.2	23478105	8.53753e-11	10.07	A/G	A:328_G:18	0.05
Spike length	lmm	NC_012874.2	23478392	8.72482e-11	10.06	C/T	C:328_T:18	0.05
Spike length	lmm	NC_012874.2	23479921	8.72482e-11	10.06	T/C	T:326_C:18	0.05
Spike length	lmm	NC_012874.2	23480302	9.19891e-11	10.04	G/A	G:326_A:18	0.05
Spike length	lmm	NC_012874.2	23480773	8.72482e-11	10.06	A/C	A:328_C:18	0.05
Spike length	lmm	NC_012874.2	23480975	8.72482e-11	10.06	T/C	T:328_C:18	0.05
Spike length	lmm	NC_012874.2	23481819	6.96664e-11	10.16	C/A	C:326_A:18	0.05
Spike length	lmm	NC_012874.2	23482144	8.72482e-11	10.06	G/T	G:330_T:18	0.05
Spike length	lmm	NC_012874.2	23483041	8.72482e-11	10.06	A/G	A:328_G:18	0.05
Spike length	lmm	NC_012874.2	23483332	8.72482e-11	10.06	C/A	C:328_A:18	0.05
Spike length	lmm	NC_012874.2	23487910	1.23414e-10	9.91	G/A	G:336_A:20	0.06
Spike length	lmm	NC_012874.2	23490926	8.72482e-11	10.06	T/A	T:328_A:18	0.05
Spike length	lmm	NC_012874.2	23496889	8.72482e-11	10.06	A/T	A:326_T:18	0.05
Spike length	lmm	NC_012874.2	23498183	6.21218e-11	10.21	C/T	C:330_T:18	0.05
Spike length	lmm	NC_012874.2	23499779	8.00115e-11	10.1	G/A	G:328_A:18	0.05
Spike length	lmm	NC_012874.2	23502049	8.72482e-11	10.06	T/C	T:326_C:18	0.05
Spike length	lmm	NC_012874.2	23502174	8.72482e-11	10.06	A/G	A:330_G:18	0.05
Spike length	lmm	NC_012874.2	23506670	7.64692e-11	10.12	A/G	A:330_G:18	0.05
Spike length	lmm	NC_012874.2	23507370	9.19891e-11	10.04	C/A	C:326_A:18	0.05
Spike length	lmm	NC_012874.2	23510862	8.53753e-11	10.07	A/C	A:328_C:18	0.05
Spike length	lmm	NC_012874.2	23513614	8.72482e-11	10.06	G/A	G:328_A:18	0.05
Spike length	lmm	NC_012874.2	23513668	8.72482e-11	10.06	A/T	A:326_T:18	0.05
Spike length	lmm	NC_012874.2	23513868	6.76079e-11	10.17	A/T	A:328_T:18	0.05
Spike length	lmm	NC_012874.2	23941536	8.72482e-11	10.06	C/A	C:326_A:18	0.05
Spike length	lmm	NC_012874.2	23941551	8.72482e-11	10.06	G/A	G:328_A:18	0.05
Spike length	lmm	NC_012874.2	23941559	8.72482e-11	10.06	C/T	C:328_T:18	0.05
Spike length	lmm	NC_012874.2	23943759	8.72482e-11	10.06	G/A	G:328_A:18	0.05
Spike length	lmm	NC_012874.2	24003697	1.36057e-08	7.87	G/A	G:327_A:19	0.05
Spike length	lmm	NC_012874.2	24004876	1.07771e-10	9.97	A/G	A:326_G:18	0.05
Spike length	lmm	NC_012874.2	24006816	6.65835e-11	10.18	C/A	C:332_A:18	0.05
Spike length	lmm	NC_012874.2	24007191	8.72482e-11	10.06	C/T	C:326_T:18	0.05
Spike length	lmm	NC_012874.2	24072957	7.83114e-11	10.11	C/T	C:336_T:18	0.05
Spike length	lmm	NC_012874.2	24073176	8.53753e-11	10.07	G/A	G:326_A:18	0.05
Spike length	lmm	NC_012874.2	24075161	8.72482e-11	10.06	G/A	G:326_A:18	0.05
Spike length	lmm	NC_012874.2	24078118	8.72482e-11	10.06	A/G	A:326_G:18	0.05
Spike length	lmm	NC_012874.2	24078141	8.72482e-11	10.06	G/A	G:328_A:18	0.05
Spike length	lmm	NC_012874.2	24079177	9.4071e-11	10.03	G/A	G:328_A:18	0.05
Spike length	lmm	NC_012874.2	24206421	3.55415e-09	8.45	C/T	C:367_T:61	0.14
Spike length	lmm	NC_012874.2	24377030	7.74002e-11	10.11	G/A	G:326_A:18	0.05
Spike length	lmm	NC_012874.2	24377043	5.1154e-11	10.29	C/A	C:326_A:18	0.05
Spike length	lmm	NC_012877.2	24460510	7.48631e-09	8.13	T/C	T:220_C:208	0.49
Spike length	lmm	NC_012874.2	24670062	2.52059e-10	9.6	C/T	C:399_T:21	0.05
Spike length	lmm	NC_012874.2	25080024	1.25426e-10	9.9	C/T	C:324_T:22	0.06
Spike length	lmm	NC_012874.2	25200785	8.71267e-11	10.06	G/A	G:326_A:18	0.05
Spike length	lmm	NC_012874.2	25207906	7.98288e-11	10.1	G/A	G:328_A:18	0.05
Spike length	lmm	NC_012874.2	25244882	8.68194e-11	10.06	G/A	G:330_A:18	0.05
Spike length	lmm	NC_012874.2	25286866	8.72482e-11	10.06	C/T	C:328_T:18	0.05
Spike length	lmm	NC_012874.2	25367528	1.94427e-11	10.71	G/C	G:206_C:222	0.48
Spike length	lmm	NC_012874.2	25368244	7.85202e-12	11.11	C/T	C:209_T:219	0.49
Spike length	lmm	NC_012874.2	25488902	1.4829e-09	8.83	G/A	G:207_A:221	0.48
Spike length	lmm	NC_012874.2	25489045	1.94427e-11	10.71	G/A	G:206_A:222	0.48
Spike length	lmm	NC_012874.2	25489125	1.94427e-11	10.71	A/G	A:206_G:222	0.48
Spike length	lmm	NC_012874.2	25489131	1.94427e-11	10.71	C/T	C:206_T:222	0.48
Spike length	lmm	NC_012874.2	25617022	9.98662e-11	10	C/T	C:342_T:18	0.05
Spike length	lmm	NC_012876.2	25775959	7.48631e-09	8.13	A/G	A:208_G:220	0.49
Spike length	lmm	NC_012876.2	25798022	9.74713e-09	8.01	T/A	T:219_A:207	0.49
Spike length	lmm	NC_012874.2	25836193	9.93245e-11	10	C/T	C:330_T:18	0.05
Spike length	lmm	NC_012874.2	25836248	7.76067e-11	10.11	C/T	C:326_T:18	0.05
Spike length	lmm	NC_012874.2	25850289	8.72482e-11	10.06	T/A	T:328_A:18	0.05
Spike length	lmm	NC_012874.2	25852073	8.72482e-11	10.06	C/T	C:326_T:18	0.05
Spike length	lmm	NC_012874.2	25853365	3.77376e-11	10.42	T/A	T:332_A:18	0.05
Spike length	lmm	NC_012874.2	25854794	6.93368e-11	10.16	C/T	C:328_T:18	0.05
Spike length	lmm	NC_012874.2	25855001	6.52289e-11	10.19	T/C	T:330_C:18	0.05
Spike length	lmm	NC_012874.2	25857393	3.69917e-11	10.43	G/C	G:336_C:18	0.05
Spike length	lmm	NC_012874.2	26037436	9.8539e-11	10.01	A/G	A:330_G:18	0.05
Spike length	lmm	NC_012874.2	26125024	6.20254e-11	10.21	T/C	T:326_C:18	0.05
Spike length	lmm	NC_012874.2	26155902	1.87971e-10	9.73	C/T	C:326_T:18	0.05
Spike length	lmm	NC_012878.2	26381095	7.48631e-09	8.13	G/A	G:220_A:208	0.49
Spike length	lmm	NC_012878.2	26381102	7.48631e-09	8.13	G/A	G:220_A:208	0.49
Spike length	lmm	NC_012878.2	26381115	7.48631e-09	8.13	C/A	C:220_A:208	0.49
Spike length	lmm	NC_012874.2	26457088	8.41274e-11	10.08	C/T	C:328_T:18	0.05
Spike length	lmm	NC_012874.2	26757799	9.31234e-11	10.03	G/A	G:336_A:18	0.05
Spike length	lmm	NC_012874.2	26917905	8.71267e-11	10.06	A/T	A:326_T:18	0.05
Spike length	lmm	NC_012874.2	27364517	1.07838e-10	9.97	C/T	C:336_T:18	0.05
Spike length	lmm	NC_012874.2	27364536	1.08834e-10	9.96	T/A	T:336_A:18	0.05
Spike length	lmm	NC_012874.2	27379193	7.55129e-11	10.12	G/A	G:332_A:18	0.05
Spike length	lmm	NC_012874.2	27379380	8.72482e-11	10.06	C/A	C:326_A:18	0.05
Spike length	lmm	NC_012874.2	27380032	7.46287e-11	10.13	G/A	G:328_A:18	0.05
Spike length	lmm	NC_012874.2	27390850	8.72482e-11	10.06	G/A	G:326_A:18	0.05
Spike length	lmm	NC_012874.2	27511686	8.72482e-11	10.06	T/C	T:328_C:18	0.05
Spike length	lmm	NC_012874.2	27514461	6.76079e-11	10.17	C/T	C:330_T:18	0.05
Spike length	lmm	NC_012874.2	27602572	8.72482e-11	10.06	G/A	G:328_A:18	0.05
Spike length	lmm	NC_012874.2	27659970	7.46287e-11	10.13	G/A	G:330_A:18	0.05
Spike length	lmm	NC_012874.2	28021373	6.25593e-11	10.2	A/C	A:332_C:18	0.05
Spike length	lmm	NC_012874.2	28021794	7.19146e-11	10.14	T/G	T:334_G:18	0.05
Spike length	lmm	NC_012874.2	28030577	8.40165e-11	10.08	C/A	C:334_A:18	0.05
Spike length	lmm	NC_012874.2	28030681	5.15162e-09	8.29	C/T	C:327_T:19	0.05
Spike length	lmm	NC_012874.2	28035533	8.72482e-11	10.06	C/T	C:328_T:18	0.05
Spike length	lmm	NC_012874.2	28035858	7.64821e-11	10.12	G/A	G:338_A:18	0.05
Spike length	lmm	NC_012874.2	28038205	2.68738e-09	8.57	C/T	C:329_T:19	0.05
Spike length	lmm	NC_012874.2	28050989	8.72482e-11	10.06	C/A	C:328_A:18	0.05
Spike length	lmm	NC_012874.2	28140666	4.1142e-09	8.39	G/A	G:333_A:19	0.05
Spike length	lmm	NC_012874.2	28140937	9.19891e-11	10.04	C/G	C:326_G:18	0.05
Spike length	lmm	NC_012874.2	28141140	8.72482e-11	10.06	C/T	C:328_T:18	0.05
Spike length	lmm	NC_012874.2	28141292	8.72482e-11	10.06	G/A	G:328_A:18	0.05
Spike length	lmm	NC_012874.2	28141711	5.53678e-11	10.26	C/T	C:336_T:18	0.05
Spike length	lmm	NC_012874.2	28141954	8.72482e-11	10.06	G/A	G:330_A:18	0.05
Spike length	lmm	NC_012874.2	28143673	8.53753e-11	10.07	G/A	G:326_A:18	0.05
Spike length	lmm	NC_012874.2	28144349	8.72482e-11	10.06	T/G	T:330_G:18	0.05
Spike length	lmm	NC_012874.2	28144800	7.61856e-11	10.12	C/A	C:326_A:18	0.05
Spike length	lmm	NC_012874.2	28148084	6.76079e-11	10.17	C/G	C:326_G:18	0.05
Spike length	lmm	NC_012874.2	28148295	8.72482e-11	10.06	G/A	G:326_A:18	0.05
Spike length	lmm	NC_012874.2	28149158	8.72482e-11	10.06	G/A	G:326_A:18	0.05
Spike length	lmm	NC_012874.2	28149498	8.11456e-11	10.09	G/C	G:326_C:18	0.05
Spike length	lmm	NC_012874.2	28149923	8.72482e-11	10.06	A/G	A:328_G:18	0.05
Spike length	lmm	NC_012874.2	28157452	8.72482e-11	10.06	C/A	C:328_A:18	0.05
Spike length	lmm	NC_012874.2	28158166	8.72482e-11	10.06	G/A	G:326_A:18	0.05
Spike length	lmm	NC_012874.2	28158180	8.72482e-11	10.06	A/T	A:326_T:18	0.05
Spike length	lmm	NC_012874.2	28158729	8.72482e-11	10.06	T/A	T:326_A:18	0.05
Spike length	lmm	NC_012874.2	28158879	8.72482e-11	10.06	C/T	C:330_T:18	0.05
Spike length	lmm	NC_012874.2	28160515	9.19891e-11	10.04	G/A	G:326_A:18	0.05
Spike length	lmm	NC_012874.2	28160850	5.08939e-11	10.29	G/A	G:342_A:18	0.05
Spike length	lmm	NC_012874.2	28231214	8.72482e-11	10.06	T/C	T:328_C:18	0.05
Spike length	lmm	NC_012874.2	28232345	7.11501e-11	10.15	G/A	G:332_A:18	0.05
Spike length	lmm	NC_012874.2	28232993	8.72482e-11	10.06	G/A	G:326_A:18	0.05
Spike length	lmm	NC_012874.2	28233141	8.72482e-11	10.06	C/T	C:326_T:18	0.05
Spike length	lmm	NC_012874.2	28233178	8.72482e-11	10.06	C/G	C:326_G:18	0.05
Spike length	lmm	NC_012874.2	28233200	8.72482e-11	10.06	A/T	A:326_T:18	0.05
Spike length	lmm	NC_012874.2	28234582	1.21304e-10	9.92	G/T	G:326_T:18	0.05
Spike length	lmm	NC_012874.2	28236466	7.21775e-11	10.14	A/G	A:326_G:18	0.05
Spike length	lmm	NC_012874.2	28242069	9.2717e-11	10.03	C/T	C:342_T:18	0.05
Spike length	lmm	NC_012876.2	28377481	7.48631e-09	8.13	C/T	C:208_T:220	0.49
Spike length	lmm	NC_012876.2	28377498	7.48631e-09	8.13	A/C	A:208_C:220	0.49
Spike length	lmm	NC_012876.2	28379235	7.48631e-09	8.13	A/G	A:208_G:220	0.49
Spike length	lmm	NC_012876.2	28379492	7.48631e-09	8.13	G/A	G:208_A:220	0.49
Spike length	lmm	NC_012876.2	28387271	7.75639e-09	8.11	A/T	A:218_T:206	0.49
Spike length	lmm	NC_012876.2	28387368	7.48631e-09	8.13	C/T	C:208_T:220	0.49
Spike length	lmm	NC_012876.2	28519283	7.48631e-09	8.13	T/G	T:220_G:208	0.49
Spike length	lmm	NC_012876.2	28519331	7.48631e-09	8.13	A/G	A:220_G:208	0.49
Spike length	lmm	NC_012874.2	28581997	8.72482e-11	10.06	G/C	G:326_C:18	0.05
Spike length	lmm	NC_012874.2	28582733	8.72482e-11	10.06	C/A	C:326_A:18	0.05
Spike length	lmm	NC_012874.2	28583032	1.23021e-10	9.91	T/C	T:332_C:18	0.05
Spike length	lmm	NC_012874.2	28586844	8.72482e-11	10.06	G/T	G:326_T:18	0.05
Spike length	lmm	NC_012874.2	28586930	8.72482e-11	10.06	G/A	G:326_A:18	0.05
Spike length	lmm	NC_012874.2	28642310	1.20411e-10	9.92	C/G	C:330_G:18	0.05
Spike length	lmm	NC_012874.2	28643392	9.36325e-11	10.03	T/G	T:328_G:18	0.05
Spike length	lmm	NC_012874.2	28679998	8.72482e-11	10.06	G/A	G:328_A:18	0.05
Spike length	lmm	NC_012874.2	28680877	8.72482e-11	10.06	C/G	C:326_G:18	0.05
Spike length	lmm	NC_012874.2	28682864	8.72482e-11	10.06	C/T	C:328_T:18	0.05
Spike length	lmm	NC_012874.2	28683999	8.72482e-11	10.06	C/T	C:330_T:18	0.05
Spike length	lmm	NC_012874.2	28684013	1.16319e-10	9.93	A/G	A:338_G:18	0.05
Spike length	lmm	NC_012874.2	28684612	8.72482e-11	10.06	G/T	G:330_T:18	0.05
Spike length	lmm	NC_012874.2	28685656	8.72482e-11	10.06	C/A	C:326_A:18	0.05
Spike length	lmm	NC_012874.2	28686564	8.72482e-11	10.06	C/T	C:326_T:18	0.05
Spike length	lmm	NC_012874.2	28686944	8.72482e-11	10.06	C/T	C:328_T:18	0.05
Spike length	lmm	NC_012874.2	28686974	1.12641e-10	9.95	C/G	C:326_G:18	0.05
Spike length	lmm	NC_012874.2	28687373	8.72482e-11	10.06	T/G	T:328_G:18	0.05
Spike length	lmm	NC_012874.2	28688115	8.06523e-11	10.09	G/A	G:326_A:18	0.05
Spike length	lmm	NC_012874.2	28688462	8.68288e-11	10.06	G/T	G:332_T:18	0.05
Spike length	lmm	NC_012874.2	28690487	8.72482e-11	10.06	G/A	G:330_A:18	0.05
Spike length	lmm	NC_012874.2	28692409	8.72482e-11	10.06	G/T	G:330_T:18	0.05
Spike length	lmm	NC_012874.2	28692849	1.21304e-10	9.92	G/A	G:328_A:18	0.05
Spike length	lmm	NC_012874.2	28693285	7.78521e-11	10.11	G/T	G:326_T:18	0.05
Spike length	lmm	NC_012874.2	28694105	8.72482e-11	10.06	G/C	G:328_C:18	0.05
Spike length	lmm	NC_012874.2	28695175	7.83757e-11	10.11	C/T	C:336_T:18	0.05
Spike length	lmm	NC_012874.2	28744730	2.70506e-11	10.57	G/A	G:327_A:19	0.05
Spike length	lmm	NC_012874.2	28745229	8.72482e-11	10.06	T/G	T:328_G:18	0.05
Spike length	lmm	NC_012874.2	28747583	8.72482e-11	10.06	G/T	G:326_T:18	0.05
Spike length	lmm	NC_012874.2	28748898	8.72482e-11	10.06	G/T	G:328_T:18	0.05
Spike length	lmm	NC_012874.2	28748965	8.72482e-11	10.06	A/G	A:328_G:18	0.05
Spike length	lmm	NC_012874.2	28751253	8.72482e-11	10.06	C/T	C:326_T:18	0.05
Spike length	lmm	NC_012874.2	28751663	8.72482e-11	10.06	A/G	A:330_G:18	0.05
Spike length	lmm	NC_012874.2	28752010	7.15891e-11	10.15	C/T	C:328_T:18	0.05
Spike length	lmm	NC_012874.2	28752198	8.72482e-11	10.06	C/T	C:330_T:18	0.05
Spike length	lmm	NC_012874.2	28756079	8.72482e-11	10.06	T/C	T:326_C:18	0.05
Spike length	lmm	NC_012874.2	28757447	8.72482e-11	10.06	T/C	T:326_C:18	0.05
Spike length	lmm	NC_012874.2	28758305	1.01639e-10	9.99	C/T	C:328_T:18	0.05
Spike length	lmm	NC_012874.2	28760204	8.72482e-11	10.06	G/A	G:326_A:18	0.05
Spike length	lmm	NC_012874.2	28761479	9.07319e-11	10.04	G/A	G:326_A:18	0.05
Spike length	lmm	NC_012874.2	28761545	8.72482e-11	10.06	A/C	A:328_C:18	0.05
Spike length	lmm	NC_012874.2	28763404	8.72482e-11	10.06	C/T	C:326_T:18	0.05
Spike length	lmm	NC_012874.2	28766623	9.49076e-11	10.02	A/T	A:340_T:18	0.05
Spike length	lmm	NC_012874.2	28766899	6.40529e-11	10.19	G/A	G:326_A:18	0.05
Spike length	lmm	NC_012874.2	28942333	4.60723e-11	10.34	A/C	A:326_C:18	0.05
Spike length	lmm	NC_012874.2	28943243	8.72482e-11	10.06	C/G	C:330_G:18	0.05
Spike length	lmm	NC_012874.2	28946376	6.36797e-11	10.2	C/T	C:328_T:18	0.05
Spike length	lmm	NC_012874.2	28950706	1.13014e-10	9.95	G/C	G:328_C:18	0.05
Spike length	lmm	NC_012874.2	28950843	1.13014e-10	9.95	G/T	G:326_T:18	0.05
Spike length	lmm	NC_012874.2	28951039	1.13014e-10	9.95	G/T	G:326_T:18	0.05
Spike length	lmm	NC_012874.2	28951553	6.67548e-11	10.18	G/A	G:334_A:18	0.05
Spike length	lmm	NC_012874.2	28953447	1.89353e-09	8.72	C/A	C:330_A:20	0.06
Spike length	lmm	NC_012874.2	28954055	8.72482e-11	10.06	T/A	T:328_A:18	0.05
Spike length	lmm	NC_012874.2	29099432	6.74911e-11	10.17	A/G	A:330_G:18	0.05
Spike length	lmm	NC_012874.2	29099497	7.8997e-11	10.1	G/C	G:328_C:18	0.05
Spike length	lmm	NC_012874.2	29099766	7.8997e-11	10.1	T/C	T:326_C:18	0.05
Spike length	lmm	NC_012874.2	29242028	8.72482e-11	10.06	G/C	G:326_C:18	0.05
Spike length	lmm	NC_012874.2	29242548	1.18796e-10	9.93	G/A	G:328_A:18	0.05
Spike length	lmm	NC_012874.2	29242801	8.72482e-11	10.06	T/A	T:326_A:18	0.05
Spike length	lmm	NC_012874.2	29243038	5.71531e-10	9.24	C/T	C:335_T:19	0.05
Spike length	lmm	NC_012874.2	29244282	9.19891e-11	10.04	T/C	T:328_C:18	0.05
Spike length	lmm	NC_012874.2	29251220	8.00814e-11	10.1	G/C	G:326_C:18	0.05
Spike length	lmm	NC_012874.2	29255481	1.05683e-10	9.98	C/T	C:334_T:18	0.05
Spike length	lmm	NC_012874.2	29309943	8.72482e-11	10.06	T/A	T:328_A:18	0.05
Spike length	lmm	NC_012874.2	29310499	7.58716e-11	10.12	G/T	G:336_T:18	0.05
Spike length	lmm	NC_012874.2	29315714	8.72482e-11	10.06	G/C	G:328_C:18	0.05
Spike length	lmm	NC_012874.2	29315836	8.72482e-11	10.06	G/A	G:326_A:18	0.05
Spike length	lmm	NC_012874.2	29315980	8.72482e-11	10.06	G/A	G:326_A:18	0.05
Spike length	lmm	NC_012874.2	29316514	1.10849e-10	9.96	T/G	T:326_G:18	0.05
Spike length	lmm	NC_012874.2	29317441	1.08159e-10	9.97	A/T	A:328_T:18	0.05
Spike length	lmm	NC_012874.2	29318099	8.40392e-11	10.08	C/T	C:328_T:18	0.05
Spike length	lmm	NC_012874.2	29319660	8.72482e-11	10.06	C/T	C:328_T:18	0.05
Spike length	lmm	NC_012874.2	29321696	8.72482e-11	10.06	T/G	T:330_G:18	0.05
Spike length	lmm	NC_012874.2	29322207	8.72482e-11	10.06	G/A	G:330_A:18	0.05
Spike length	lmm	NC_012874.2	29323292	8.72482e-11	10.06	C/T	C:326_T:18	0.05
Spike length	lmm	NC_012874.2	29326131	5.82189e-11	10.23	A/G	A:328_G:18	0.05
Spike length	lmm	NC_012874.2	29328507	5.82189e-11	10.23	C/A	C:326_A:18	0.05
Spike length	lmm	NC_012874.2	29328632	4.98213e-11	10.3	G/A	G:332_A:18	0.05
Spike length	lmm	NC_012874.2	29328811	5.82189e-11	10.23	T/G	T:328_G:18	0.05
Spike length	lmm	NC_012874.2	29329466	5.82189e-11	10.23	C/T	C:328_T:18	0.05
Spike length	lmm	NC_012874.2	29333001	5.82189e-11	10.23	G/T	G:326_T:18	0.05
Spike length	lmm	NC_012874.2	29340397	8.72482e-11	10.06	T/C	T:328_C:18	0.05
Spike length	lmm	NC_012874.2	29341180	8.72482e-11	10.06	G/C	G:326_C:18	0.05
Spike length	lmm	NC_012874.2	29341575	8.72482e-11	10.06	T/A	T:326_A:18	0.05
Spike length	lmm	NC_012874.2	29346537	8.72482e-11	10.06	G/A	G:328_A:18	0.05
Spike length	lmm	NC_012874.2	29347237	8.72482e-11	10.06	A/T	A:330_T:18	0.05
Spike length	lmm	NC_012874.2	29411020	8.72482e-11	10.06	G/T	G:326_T:18	0.05
Spike length	lmm	NC_012874.2	29414620	1.13014e-10	9.95	G/A	G:326_A:18	0.05
Spike length	lmm	NC_012874.2	29414710	8.72482e-11	10.06	G/T	G:326_T:18	0.05
Spike length	lmm	NC_012874.2	29418758	7.44937e-11	10.13	A/T	A:332_T:18	0.05
Spike length	lmm	NC_012874.2	29453747	8.72482e-11	10.06	T/C	T:328_C:18	0.05
Spike length	lmm	NC_012874.2	29456107	8.70602e-11	10.06	G/A	G:332_A:18	0.05
Spike length	lmm	NC_012874.2	29456901	8.72482e-11	10.06	G/A	G:328_A:18	0.05
Spike length	lmm	NC_012874.2	29457749	7.82428e-11	10.11	G/A	G:334_A:18	0.05
Spike length	lmm	NC_012874.2	29459063	8.44158e-11	10.07	G/A	G:330_A:18	0.05
Spike length	lmm	NC_012874.2	29461051	8.72482e-11	10.06	C/G	C:328_G:18	0.05
Spike length	lmm	NC_012874.2	29464281	8.72482e-11	10.06	A/C	A:326_C:18	0.05
Spike length	lmm	NC_012874.2	29465683	8.66191e-11	10.06	G/A	G:330_A:18	0.05
Spike length	lmm	NC_012874.2	29465934	1.05182e-10	9.98	C/T	C:328_T:18	0.05
Spike length	lmm	NC_012874.2	29467021	8.72482e-11	10.06	T/C	T:328_C:18	0.05
Spike length	lmm	NC_012874.2	29470961	8.72482e-11	10.06	C/G	C:330_G:18	0.05
Spike length	lmm	NC_012874.2	29491363	8.53753e-11	10.07	G/A	G:328_A:18	0.05
Spike length	lmm	NC_012874.2	29493527	9.39103e-11	10.03	G/A	G:328_A:18	0.05
Spike length	lmm	NC_012874.2	29493708	8.39785e-11	10.08	G/A	G:326_A:18	0.05
Spike length	lmm	NC_012874.2	29493893	8.72482e-11	10.06	C/T	C:326_T:18	0.05
Spike length	lmm	NC_012874.2	29493985	8.72482e-11	10.06	A/T	A:326_T:18	0.05
Spike length	lmm	NC_012874.2	29494373	8.72482e-11	10.06	G/T	G:330_T:18	0.05
Spike length	lmm	NC_012874.2	29506166	9.18404e-11	10.04	G/C	G:326_C:18	0.05
Spike length	lmm	NC_012874.2	29506799	9.18404e-11	10.04	C/A	C:326_A:18	0.05
Spike length	lmm	NC_012874.2	29507116	9.18404e-11	10.04	G/C	G:326_C:18	0.05
Spike length	lmm	NC_012874.2	29509485	8.72482e-11	10.06	C/T	C:328_T:18	0.05
Spike length	lmm	NC_012874.2	29509563	8.00115e-11	10.1	C/T	C:330_T:18	0.05
Spike length	lmm	NC_012874.2	29509767	8.72482e-11	10.06	C/T	C:326_T:18	0.05
Spike length	lmm	NC_012874.2	29512574	8.72482e-11	10.06	A/G	A:328_G:18	0.05
Spike length	lmm	NC_012874.2	29513485	9.19891e-11	10.04	G/T	G:326_T:18	0.05
Spike length	lmm	NC_012874.2	29626155	7.72878e-11	10.11	C/A	C:328_A:18	0.05
Spike length	lmm	NC_012874.2	29626188	7.72878e-11	10.11	C/A	C:328_A:18	0.05
Spike length	lmm	NC_012874.2	29627097	8.53753e-11	10.07	A/T	A:328_T:18	0.05
Spike length	lmm	NC_012874.2	29627280	8.72482e-11	10.06	A/G	A:330_G:18	0.05
Spike length	lmm	NC_012874.2	29630779	9.58952e-11	10.02	T/A	T:332_A:18	0.05
Spike length	lmm	NC_012874.2	29634856	8.72482e-11	10.06	C/A	C:326_A:18	0.05
Spike length	lmm	NC_012874.2	29635221	9.19891e-11	10.04	T/C	T:326_C:18	0.05
Spike length	lmm	NC_012874.2	29635622	8.72482e-11	10.06	G/A	G:328_A:18	0.05
Spike length	lmm	NC_012874.2	29793725	8.72482e-11	10.06	G/A	G:328_A:18	0.05
Spike length	lmm	NC_012874.2	29796152	9.19891e-11	10.04	C/G	C:326_G:18	0.05
Spike length	lmm	NC_012874.2	29893295	8.72482e-11	10.06	G/A	G:330_A:18	0.05
Spike length	lmm	NC_012874.2	29895343	8.72482e-11	10.06	G/A	G:328_A:18	0.05
Spike length	lmm	NC_012874.2	29895980	9.52452e-11	10.02	C/T	C:328_T:18	0.05
Spike length	lmm	NC_012874.2	29905611	9.17758e-11	10.04	G/A	G:328_A:18	0.05
Spike length	lmm	NC_012874.2	29906841	1.12601e-10	9.95	G/T	G:340_T:18	0.05
Spike length	lmm	NC_012874.2	29906926	8.72482e-11	10.06	C/T	C:328_T:18	0.05
Spike length	lmm	NC_012874.2	29906989	8.72482e-11	10.06	A/T	A:328_T:18	0.05
Spike length	lmm	NC_012874.2	29962014	8.31963e-09	8.08	T/C	T:354_C:22	0.06
Spike length	lmm	NC_012874.2	29971892	5.9191e-11	10.23	C/T	C:332_T:18	0.05
Spike length	lmm	NC_012874.2	29999569	8.72482e-11	10.06	G/A	G:330_A:18	0.05
Spike length	lmm	NC_012874.2	30000744	8.72482e-11	10.06	T/A	T:328_A:18	0.05
Spike length	lmm	NC_012874.2	30002055	8.72482e-11	10.06	G/C	G:330_C:18	0.05
Spike length	lmm	NC_012874.2	30002764	8.53819e-11	10.07	C/G	C:326_G:18	0.05
Spike length	lmm	NC_012874.2	30194261	1.1046e-10	9.96	C/T	C:326_T:18	0.05
Spike length	lmm	NC_012874.2	30195849	1.01306e-10	9.99	G/A	G:326_A:18	0.05
Spike length	lmm	NC_012874.2	30239426	8.09635e-11	10.09	G/A	G:326_A:18	0.05
Spike length	lmm	NC_012876.2	30276764	7.48631e-09	8.13	C/T	C:220_T:208	0.49
Spike length	lmm	NC_012874.2	30378383	8.72482e-11	10.06	G/A	G:326_A:18	0.05
Spike length	lmm	NC_012874.2	30379432	6.1696e-11	10.21	T/A	T:326_A:18	0.05
Spike length	lmm	NC_012874.2	30383515	8.4648e-11	10.07	T/A	T:328_A:18	0.05
Spike length	lmm	NC_012874.2	30383638	9.29338e-11	10.03	A/T	A:332_T:18	0.05
Spike length	lmm	NC_012874.2	30738767	8.13354e-11	10.09	T/G	T:326_G:18	0.05
Spike length	lmm	NC_012876.2	30772912	2.67521e-09	8.57	G/A	G:217_A:211	0.49
Spike length	lmm	NC_012876.2	30772937	2.67521e-09	8.57	A/G	A:217_G:211	0.49
Spike length	lmm	NC_012874.2	30830978	5.83846e-11	10.23	G/A	G:330_A:18	0.05
Spike length	lmm	NC_012874.2	30831192	1.04309e-10	9.98	C/A	C:326_A:18	0.05
Spike length	lmm	NC_012874.2	30831530	8.72482e-11	10.06	A/G	A:326_G:18	0.05
Spike length	lmm	NC_012874.2	30982204	8.72482e-11	10.06	C/T	C:328_T:18	0.05
Spike length	lmm	NC_012874.2	30984654	8.44158e-11	10.07	G/T	G:330_T:18	0.05
Spike length	lmm	NC_012874.2	30985180	8.72482e-11	10.06	A/T	A:326_T:18	0.05
Spike length	lmm	NC_012874.2	30985662	1.09329e-10	9.96	G/T	G:328_T:18	0.05
Spike length	lmm	NC_012874.2	30986414	8.53753e-11	10.07	T/A	T:326_A:18	0.05
Spike length	lmm	NC_012874.2	30987098	8.53753e-11	10.07	A/G	A:326_G:18	0.05
Spike length	lmm	NC_012874.2	30990943	8.53753e-11	10.07	T/C	T:328_C:18	0.05
Spike length	lmm	NC_012874.2	30990975	8.53753e-11	10.07	A/T	A:328_T:18	0.05
Spike length	lmm	NC_012874.2	30994545	1.27495e-10	9.89	G/T	G:328_T:18	0.05
Spike length	lmm	NC_012874.2	30996571	9.18618e-11	10.04	C/T	C:326_T:18	0.05
Spike length	lmm	NC_012874.2	30996897	3.82763e-10	9.42	G/A	G:327_A:19	0.05
Spike length	lmm	NC_012874.2	31000566	8.72482e-11	10.06	C/T	C:330_T:18	0.05
Spike length	lmm	NC_012874.2	31000830	8.72482e-11	10.06	G/T	G:328_T:18	0.05
Spike length	lmm	NC_012874.2	31001513	9.58952e-11	10.02	G/A	G:332_A:18	0.05
Spike length	lmm	NC_012874.2	31003619	9.79177e-11	10.01	C/T	C:330_T:18	0.05
Spike length	lmm	NC_012874.2	31004266	8.72482e-11	10.06	G/A	G:326_A:18	0.05
Spike length	lmm	NC_012874.2	31007293	9.7221e-11	10.01	C/G	C:338_G:18	0.05
Spike length	lmm	NC_012874.2	31007395	7.10884e-11	10.15	G/A	G:330_A:18	0.05
Spike length	lmm	NC_012874.2	31008717	9.75514e-11	10.01	C/A	C:326_A:18	0.05
Spike length	lmm	NC_012874.2	31010759	6.72407e-11	10.17	A/T	A:342_T:18	0.05
Spike length	lmm	NC_012874.2	31012279	6.37048e-11	10.2	G/T	G:332_T:18	0.05
Spike length	lmm	NC_012874.2	31016145	8.72482e-11	10.06	C/T	C:328_T:18	0.05
Spike length	lmm	NC_012874.2	31016191	8.72482e-11	10.06	G/T	G:330_T:18	0.05
Spike length	lmm	NC_012874.2	31020058	1.16305e-10	9.93	G/C	G:330_C:18	0.05
Spike length	lmm	NC_012874.2	31020548	8.72482e-11	10.06	G/A	G:326_A:18	0.05
Spike length	lmm	NC_012874.2	31040082	1.01696e-10	9.99	G/A	G:332_A:18	0.05
Spike length	lmm	NC_012874.2	31042457	6.80535e-11	10.17	C/T	C:336_T:18	0.05
Spike length	lmm	NC_012874.2	31042464	9.00831e-11	10.05	G/A	G:338_A:18	0.05
Spike length	lmm	NC_012874.2	31043201	9.70802e-11	10.01	G/A	G:328_A:18	0.05
Spike length	lmm	NC_012874.2	31045058	1.04309e-10	9.98	G/A	G:326_A:18	0.05
Spike length	lmm	NC_012874.2	31046686	8.72482e-11	10.06	G/A	G:328_A:18	0.05
Spike length	lmm	NC_012874.2	31048454	8.72482e-11	10.06	T/A	T:328_A:18	0.05
Spike length	lmm	NC_012874.2	31050345	8.13354e-11	10.09	A/T	A:326_T:18	0.05
Spike length	lmm	NC_012874.2	31051402	8.72482e-11	10.06	A/G	A:326_G:18	0.05
Spike length	lmm	NC_012874.2	31052403	8.72482e-11	10.06	C/G	C:330_G:18	0.05
Spike length	lmm	NC_012874.2	31052639	8.72482e-11	10.06	C/T	C:328_T:18	0.05
Spike length	lmm	NC_012874.2	31055098	8.72482e-11	10.06	T/C	T:326_C:18	0.05
Spike length	lmm	NC_012874.2	31055484	8.72482e-11	10.06	G/A	G:328_A:18	0.05
Spike length	lmm	NC_012874.2	31077983	8.72482e-11	10.06	C/A	C:330_A:18	0.05
Spike length	lmm	NC_012874.2	31079107	8.68554e-11	10.06	T/C	T:326_C:18	0.05
Spike length	lmm	NC_012874.2	31079524	9.96358e-11	10	G/A	G:330_A:18	0.05
Spike length	lmm	NC_012874.2	31080068	8.72482e-11	10.06	C/T	C:330_T:18	0.05
Spike length	lmm	NC_012874.2	31080703	8.72482e-11	10.06	G/C	G:326_C:18	0.05
Spike length	lmm	NC_012874.2	31082393	8.72482e-11	10.06	G/A	G:328_A:18	0.05
Spike length	lmm	NC_012876.2	31093641	7.48631e-09	8.13	A/C	A:208_C:220	0.49
Spike length	lmm	NC_012876.2	31157757	7.48631e-09	8.13	G/A	G:220_A:208	0.49
Spike length	lmm	NC_012874.2	31184972	7.76067e-11	10.11	G/C	G:328_C:18	0.05
Spike length	lmm	NC_012874.2	31193441	8.54096e-11	10.07	A/C	A:330_C:18	0.05
Spike length	lmm	NC_012874.2	31194786	7.76067e-11	10.11	A/T	A:326_T:18	0.05
Spike length	lmm	NC_012874.2	31199112	9.7153e-11	10.01	G/A	G:332_A:18	0.05
Spike length	lmm	NC_012874.2	31200394	7.78924e-11	10.11	T/A	T:330_A:18	0.05
Spike length	lmm	NC_012874.2	31200793	8.72482e-11	10.06	G/C	G:330_C:18	0.05
Spike length	lmm	NC_012874.2	31202342	8.53753e-11	10.07	C/T	C:328_T:18	0.05
Spike length	lmm	NC_012874.2	31203216	5.53002e-11	10.26	C/T	C:334_T:18	0.05
Spike length	lmm	NC_012874.2	31204407	6.6768e-11	10.18	A/T	A:336_T:18	0.05
Spike length	lmm	NC_012874.2	31206045	9.64645e-11	10.02	G/T	G:328_T:18	0.05
Spike length	lmm	NC_012874.2	31206161	8.72482e-11	10.06	G/T	G:330_T:18	0.05
Spike length	lmm	NC_012874.2	31208198	8.72482e-11	10.06	G/T	G:328_T:18	0.05
Spike length	lmm	NC_012874.2	31211015	8.72482e-11	10.06	C/T	C:328_T:18	0.05
Spike length	lmm	NC_012874.2	31211496	8.72482e-11	10.06	C/T	C:328_T:18	0.05
Spike length	lmm	NC_012874.2	31211513	8.72482e-11	10.06	G/A	G:328_A:18	0.05
Spike length	lmm	NC_012874.2	31212293	8.72482e-11	10.06	C/T	C:330_T:18	0.05
Spike length	lmm	NC_012874.2	31212528	9.19891e-11	10.04	A/C	A:326_C:18	0.05
Spike length	lmm	NC_012874.2	31214600	8.72482e-11	10.06	G/A	G:328_A:18	0.05
Spike length	lmm	NC_012874.2	31216262	8.0204e-11	10.1	G/A	G:330_A:18	0.05
Spike length	lmm	NC_012874.2	31217246	8.72482e-11	10.06	C/T	C:326_T:18	0.05
Spike length	lmm	NC_012874.2	31217338	9.19891e-11	10.04	G/T	G:326_T:18	0.05
Spike length	lmm	NC_012874.2	31217607	8.72482e-11	10.06	C/T	C:330_T:18	0.05
Spike length	lmm	NC_012874.2	31219338	8.72482e-11	10.06	C/T	C:326_T:18	0.05
Spike length	lmm	NC_012874.2	31219421	7.54331e-11	10.12	C/T	C:336_T:18	0.05
Spike length	lmm	NC_012874.2	31219427	7.54331e-11	10.12	G/A	G:336_A:18	0.05
Spike length	lmm	NC_012874.2	31220371	8.72482e-11	10.06	G/A	G:328_A:18	0.05
Spike length	lmm	NC_012874.2	31222661	8.72482e-11	10.06	C/T	C:328_T:18	0.05
Spike length	lmm	NC_012874.2	31222698	5.7517e-11	10.24	C/T	C:326_T:18	0.05
Spike length	lmm	NC_012874.2	31222722	5.7517e-11	10.24	T/A	T:326_A:18	0.05
Spike length	lmm	NC_012874.2	31223178	8.72482e-11	10.06	C/A	C:328_A:18	0.05
Spike length	lmm	NC_012874.2	31225342	8.31888e-11	10.08	A/G	A:328_G:18	0.05
Spike length	lmm	NC_012874.2	31231870	8.72482e-11	10.06	G/T	G:328_T:18	0.05
Spike length	lmm	NC_012874.2	31232373	8.4891e-11	10.07	C/T	C:330_T:18	0.05
Spike length	lmm	NC_012874.2	31232916	7.44658e-11	10.13	C/T	C:328_T:18	0.05
Spike length	lmm	NC_012874.2	31232923	8.72482e-11	10.06	T/G	T:330_G:18	0.05
Spike length	lmm	NC_012874.2	31232976	7.6661e-11	10.12	A/T	A:326_T:18	0.05
Spike length	lmm	NC_012874.2	31233614	1.21304e-10	9.92	C/T	C:326_T:18	0.05
Spike length	lmm	NC_012874.2	31233630	1.21304e-10	9.92	C/T	C:326_T:18	0.05
Spike length	lmm	NC_012874.2	31234463	8.81739e-11	10.05	G/A	G:328_A:18	0.05
Spike length	lmm	NC_012874.2	31235257	8.72482e-11	10.06	C/T	C:328_T:18	0.05
Spike length	lmm	NC_012874.2	31235905	5.61483e-11	10.25	T/A	T:332_A:18	0.05
Spike length	lmm	NC_012874.2	31236453	9.19891e-11	10.04	A/T	A:326_T:18	0.05
Spike length	lmm	NC_012874.2	31238860	1.01375e-10	9.99	C/T	C:326_T:18	0.05
Spike length	lmm	NC_012874.2	31240163	5.28839e-11	10.28	C/T	C:332_T:18	0.05
Spike length	lmm	NC_012874.2	31240542	8.72482e-11	10.06	C/T	C:328_T:18	0.05
Spike length	lmm	NC_012874.2	31240903	8.72482e-11	10.06	G/A	G:326_A:18	0.05
Spike length	lmm	NC_012874.2	31241027	8.72482e-11	10.06	C/G	C:328_G:18	0.05
Spike length	lmm	NC_012874.2	31241109	8.72482e-11	10.06	C/G	C:328_G:18	0.05
Spike length	lmm	NC_012874.2	31241388	8.72482e-11	10.06	C/T	C:330_T:18	0.05
Spike length	lmm	NC_012874.2	31244311	8.36334e-11	10.08	A/G	A:334_G:18	0.05
Spike length	lmm	NC_012874.2	31246303	8.72482e-11	10.06	G/A	G:328_A:18	0.05
Spike length	lmm	NC_012874.2	31250339	8.72482e-11	10.06	A/G	A:328_G:18	0.05
Spike length	lmm	NC_012874.2	31252228	8.72482e-11	10.06	T/A	T:326_A:18	0.05
Spike length	lmm	NC_012874.2	31253766	6.41143e-11	10.19	A/T	A:326_T:18	0.05
Spike length	lmm	NC_012874.2	31256516	1.06653e-10	9.97	C/G	C:326_G:18	0.05
Spike length	lmm	NC_012874.2	31256572	8.4891e-11	10.07	C/T	C:332_T:18	0.05
Spike length	lmm	NC_012874.2	31256987	8.72482e-11	10.06	G/A	G:328_A:18	0.05
Spike length	lmm	NC_012874.2	31258894	1.05182e-10	9.98	G/C	G:328_C:18	0.05
Spike length	lmm	NC_012874.2	31259426	8.72482e-11	10.06	G/A	G:328_A:18	0.05
Spike length	lmm	NC_012874.2	31259967	6.2277e-11	10.21	A/T	A:332_T:18	0.05
Spike length	lmm	NC_012874.2	31260114	8.72482e-11	10.06	C/G	C:330_G:18	0.05
Spike length	lmm	NC_012874.2	31264433	8.70138e-11	10.06	C/G	C:334_G:18	0.05
Spike length	lmm	NC_012874.2	31267528	8.72482e-11	10.06	G/T	G:328_T:18	0.05
Spike length	lmm	NC_012878.2	31295026	7.48631e-09	8.13	A/T	A:220_T:208	0.49
Spike length	lmm	NC_012874.2	31308920	8.72482e-11	10.06	C/T	C:328_T:18	0.05
Spike length	lmm	NC_012874.2	31309318	8.00115e-11	10.1	G/A	G:332_A:18	0.05
Spike length	lmm	NC_012874.2	31309627	8.72482e-11	10.06	T/A	T:326_A:18	0.05
Spike length	lmm	NC_012874.2	31309659	8.21679e-11	10.09	G/A	G:326_A:18	0.05
Spike length	lmm	NC_012874.2	31309986	9.84596e-11	10.01	C/T	C:328_T:18	0.05
Spike length	lmm	NC_012874.2	31310433	8.72482e-11	10.06	C/T	C:328_T:18	0.05
Spike length	lmm	NC_012874.2	31310732	8.72482e-11	10.06	G/A	G:328_A:18	0.05
Spike length	lmm	NC_012874.2	31312115	8.72482e-11	10.06	C/T	C:326_T:18	0.05
Spike length	lmm	NC_012874.2	31312214	1.04561e-10	9.98	G/A	G:328_A:18	0.05
Spike length	lmm	NC_012874.2	31312872	8.72482e-11	10.06	C/T	C:328_T:18	0.05
Spike length	lmm	NC_012874.2	31312905	8.72482e-11	10.06	T/C	T:330_C:18	0.05
Spike length	lmm	NC_012874.2	31312945	8.72482e-11	10.06	G/T	G:330_T:18	0.05
Spike length	lmm	NC_012874.2	31314540	9.19891e-11	10.04	A/G	A:326_G:18	0.05
Spike length	lmm	NC_012874.2	31315072	8.72482e-11	10.06	G/A	G:330_A:18	0.05
Spike length	lmm	NC_012874.2	31318339	2.00836e-11	10.7	G/A	G:338_A:20	0.06
Spike length	lmm	NC_012874.2	31318406	1.58111e-11	10.8	G/T	G:342_T:18	0.05
Spike length	lmm	NC_012874.2	31319968	8.92878e-11	10.05	A/T	A:326_T:18	0.05
Spike length	lmm	NC_012874.2	31320246	8.53753e-11	10.07	G/C	G:328_C:18	0.05
Spike length	lmm	NC_012874.2	31321303	9.7153e-11	10.01	G/A	G:332_A:18	0.05
Spike length	lmm	NC_012874.2	31324352	8.72482e-11	10.06	A/G	A:330_G:18	0.05
Spike length	lmm	NC_012874.2	31325498	8.72482e-11	10.06	C/A	C:330_A:18	0.05
Spike length	lmm	NC_012874.2	31325511	8.72482e-11	10.06	G/A	G:330_A:18	0.05
Spike length	lmm	NC_012874.2	31326543	8.72482e-11	10.06	A/G	A:326_G:18	0.05
Spike length	lmm	NC_012874.2	31394148	3.20242e-11	10.49	C/T	C:330_T:18	0.05
Spike length	lmm	NC_012874.2	31580910	6.8533e-11	10.16	C/T	C:326_T:18	0.05
Spike length	lmm	NC_012874.2	31700684	1.94427e-11	10.71	A/T	A:222_T:206	0.48
Spike length	lmm	NC_012874.2	31700779	1.94427e-11	10.71	A/C	A:222_C:206	0.48
Spike length	lmm	NC_012874.2	31740638	9.45443e-11	10.02	C/T	C:326_T:18	0.05
Spike length	lmm	NC_012874.2	31740794	9.45443e-11	10.02	G/A	G:328_A:18	0.05
Spike length	lmm	NC_012874.2	31744908	1.41712e-10	9.85	G/C	G:336_C:18	0.05
Spike length	lmm	NC_012874.2	31747202	1.17154e-10	9.93	G/A	G:328_A:18	0.05
Spike length	lmm	NC_012874.2	31748467	2.87983e-08	7.54	A/T	A:325_T:21	0.06
Spike length	lmm	NC_012874.2	31804588	8.53753e-11	10.07	C/T	C:328_T:18	0.05
Spike length	lmm	NC_012874.2	31822601	1.06653e-10	9.97	G/T	G:326_T:18	0.05
Spike length	lmm	NC_012874.2	31824331	6.70917e-11	10.17	C/G	C:340_G:18	0.05
Spike length	lmm	NC_012874.2	31825769	7.02033e-11	10.15	G/T	G:328_T:18	0.05
Spike length	lmm	NC_012874.2	32061642	6.92074e-11	10.16	T/G	T:330_G:18	0.05
Spike length	lmm	NC_012874.2	32062481	8.53753e-11	10.07	G/A	G:326_A:18	0.05
Spike length	lmm	NC_012874.2	32073376	6.56724e-10	9.18	A/G	A:330_G:18	0.05
Spike length	lmm	NC_012874.2	32177334	5.14415e-11	10.29	G/T	G:328_T:18	0.05
Spike length	lmm	NC_012874.2	32178539	4.98733e-11	10.3	G/A	G:338_A:18	0.05
Spike length	lmm	NC_012874.2	32194786	8.72482e-11	10.06	C/T	C:328_T:18	0.05
Spike length	lmm	NC_012874.2	32340895	8.53753e-11	10.07	T/A	T:326_A:18	0.05
Spike length	lmm	NC_012874.2	32439048	6.1349e-11	10.21	A/G	A:336_G:18	0.05
Spike length	lmm	NC_012874.2	33065599	2.01042e-12	11.7	C/A	C:334_A:18	0.05
Spike length	lmm	NC_012874.2	33251698	1.65844e-10	9.78	C/T	C:326_T:18	0.05
Spike length	lmm	NC_012874.2	33315170	7.77151e-11	10.11	G/A	G:336_A:18	0.05
Spike length	lmm	NC_012874.2	33437983	1.36626e-08	7.86	C/T	C:364_T:20	0.05
Spike length	lmm	NC_012874.2	33467409	8.53753e-11	10.07	G/A	G:328_A:18	0.05
Spike length	lmm	NC_012874.2	33481136	8.28567e-11	10.08	C/T	C:328_T:18	0.05
Spike length	lmm	NC_012874.2	33486369	8.72482e-11	10.06	C/G	C:328_G:18	0.05
Spike length	lmm	NC_012874.2	33486400	8.72482e-11	10.06	G/A	G:326_A:18	0.05
Spike length	lmm	NC_012874.2	33515450	7.39617e-11	10.13	T/C	T:336_C:18	0.05
Spike length	lmm	NC_012874.2	33712037	1.04113e-08	7.98	G/A	G:401_A:23	0.05
Spike length	lmm	NC_012874.2	34151621	8.28567e-11	10.08	C/T	C:326_T:18	0.05
Spike length	lmm	NC_012874.2	34800216	7.26593e-11	10.14	G/T	G:330_T:18	0.05
Spike length	lmm	NC_012874.2	34801445	4.65191e-11	10.33	A/T	A:338_T:18	0.05
Spike length	lmm	NC_012874.2	34801687	6.30488e-11	10.2	T/C	T:338_C:18	0.05
Spike length	lmm	NC_012874.2	34802509	8.72482e-11	10.06	C/T	C:326_T:18	0.05
Spike length	lmm	NC_012874.2	34802553	8.72482e-11	10.06	G/C	G:328_C:18	0.05
Spike length	lmm	NC_012874.2	34802934	8.72482e-11	10.06	C/T	C:328_T:18	0.05
Spike length	lmm	NC_012874.2	34803810	8.00115e-11	10.1	T/C	T:328_C:18	0.05
Spike length	lmm	NC_012874.2	34805248	8.72482e-11	10.06	G/A	G:328_A:18	0.05
Spike length	lmm	NC_012874.2	34805427	1.12882e-10	9.95	C/T	C:326_T:18	0.05
Spike length	lmm	NC_012874.2	34805962	8.72482e-11	10.06	T/C	T:328_C:18	0.05
Spike length	lmm	NC_012874.2	34811165	9.58952e-11	10.02	A/T	A:330_T:18	0.05
Spike length	lmm	NC_012874.2	34811276	8.72482e-11	10.06	G/A	G:328_A:18	0.05
Spike length	lmm	NC_012874.2	35049366	2.84692e-10	9.55	C/A	C:404_A:22	0.05
Spike length	lmm	NC_012874.2	35186571	1.0092e-12	12	G/C	G:400_C:22	0.05
Spike length	lmm	NC_012874.2	35190554	8.72482e-11	10.06	G/A	G:326_A:18	0.05
Spike length	lmm	NC_012874.2	35191443	8.72482e-11	10.06	C/T	C:328_T:18	0.05
Spike length	lmm	NC_012874.2	35191699	8.72482e-11	10.06	G/C	G:330_C:18	0.05
Spike length	lmm	NC_012874.2	35192003	1.37118e-08	7.86	G/A	G:324_A:20	0.06
Spike length	lmm	NC_012874.2	35782958	2.04002e-08	7.69	G/A	G:405_A:23	0.05
Spike length	lmm	NC_012874.2	36334052	1.50126e-10	9.82	G/A	G:330_A:18	0.05
Spike length	lmm	NC_012874.2	36400496	8.72482e-11	10.06	G/C	G:328_C:18	0.05
Spike length	lmm	NC_012874.2	36400738	8.72482e-11	10.06	C/A	C:330_A:18	0.05
Spike length	lmm	NC_012874.2	36400756	8.72482e-11	10.06	T/C	T:330_C:18	0.05
Spike length	lmm	NC_012874.2	36405656	3.55155e-11	10.45	G/A	G:403_A:23	0.05
Spike length	lmm	NC_012870.2	36428581	7.48631e-09	8.13	C/A	C:220_A:208	0.49
Spike length	lmm	NC_012875.2	36555867	2.14529e-08	7.67	C/T	C:399_T:23	0.05
Spike length	lmm	NC_012874.2	37002153	8.72482e-11	10.06	T/A	T:328_A:18	0.05
Spike length	lmm	NC_012874.2	37002485	8.72482e-11	10.06	T/C	T:326_C:18	0.05
Spike length	lmm	NC_012871.2	37141941	7.48631e-09	8.13	A/G	A:220_G:208	0.49
Spike length	lmm	NC_012871.2	37142331	7.48631e-09	8.13	C/T	C:220_T:208	0.49
Spike length	lmm	NC_012876.2	37202380	1.63709e-08	7.79	G/A	G:210_A:218	0.49
Spike length	lmm	NC_012874.2	37443491	1.26941e-10	9.9	C/T	C:330_T:18	0.05
Spike length	lmm	NC_012874.2	37443596	1.45773e-10	9.84	A/G	A:328_G:18	0.05
Spike length	lmm	NC_012874.2	37677317	8.53753e-11	10.07	C/T	C:328_T:18	0.05
Spike length	lmm	NC_012874.2	37677464	8.09897e-10	9.09	G/A	G:325_A:19	0.06
Spike length	lmm	NC_012874.2	37677780	8.53753e-11	10.07	A/C	A:326_C:18	0.05
Spike length	lmm	NC_012874.2	37677890	8.53753e-11	10.07	T/A	T:326_A:18	0.05
Spike length	lmm	NC_012874.2	37677998	8.53753e-11	10.07	G/T	G:326_T:18	0.05
Spike length	lmm	NC_012874.2	37678725	6.08735e-11	10.22	G/A	G:328_A:18	0.05
Spike length	lmm	NC_012874.2	37678769	8.53753e-11	10.07	A/G	A:328_G:18	0.05
Spike length	lmm	NC_012874.2	37679199	8.44209e-11	10.07	C/T	C:326_T:18	0.05
Spike length	lmm	NC_012874.2	37679236	8.53753e-11	10.07	G/A	G:328_A:18	0.05
Spike length	lmm	NC_012874.2	37679446	5.81368e-11	10.24	G/A	G:330_A:18	0.05
Spike length	lmm	NC_012874.2	37679507	1.0149e-10	9.99	G/A	G:328_A:18	0.05
Spike length	lmm	NC_012874.2	37679531	8.53753e-11	10.07	G/A	G:326_A:18	0.05
Spike length	lmm	NC_012874.2	37680365	8.53753e-11	10.07	C/A	C:328_A:18	0.05
Spike length	lmm	NC_012874.2	37680398	8.53753e-11	10.07	A/G	A:328_G:18	0.05
Spike length	lmm	NC_012874.2	37680567	8.53753e-11	10.07	T/A	T:326_A:18	0.05
Spike length	lmm	NC_012874.2	37680718	2.51997e-10	9.6	T/C	T:326_C:20	0.06
Spike length	lmm	NC_012874.2	37681092	8.53753e-11	10.07	G/A	G:326_A:18	0.05
Spike length	lmm	NC_012874.2	37681188	8.53753e-11	10.07	T/C	T:328_C:18	0.05
Spike length	lmm	NC_012874.2	37681307	8.21247e-11	10.09	C/A	C:336_A:18	0.05
Spike length	lmm	NC_012874.2	37682107	9.20325e-11	10.04	C/T	C:326_T:18	0.05
Spike length	lmm	NC_012874.2	37682513	8.53753e-11	10.07	T/C	T:326_C:18	0.05
Spike length	lmm	NC_012874.2	37683360	5.85157e-11	10.23	C/T	C:330_T:18	0.05
Spike length	lmm	NC_012874.2	37685166	5.54116e-11	10.26	G/A	G:332_A:18	0.05
Spike length	lmm	NC_012874.2	37686824	6.76079e-11	10.17	A/C	A:330_C:18	0.05
Spike length	lmm	NC_012874.2	37686967	8.72482e-11	10.06	A/G	A:328_G:18	0.05
Spike length	lmm	NC_012874.2	37688204	8.72482e-11	10.06	C/T	C:326_T:18	0.05
Spike length	lmm	NC_012874.2	37690369	1.07895e-10	9.97	G/A	G:328_A:18	0.05
Spike length	lmm	NC_012874.2	37692254	8.00115e-11	10.1	G/A	G:330_A:18	0.05
Spike length	lmm	NC_012874.2	37693161	8.53753e-11	10.07	G/C	G:326_C:18	0.05
Spike length	lmm	NC_012874.2	37704151	8.72482e-11	10.06	C/G	C:326_G:18	0.05
Spike length	lmm	NC_012874.2	37705948	6.43928e-11	10.19	A/T	A:326_T:18	0.05
Spike length	lmm	NC_012874.2	37706069	8.36005e-11	10.08	C/T	C:326_T:18	0.05
Spike length	lmm	NC_012874.2	37706239	8.72482e-11	10.06	G/T	G:328_T:18	0.05
Spike length	lmm	NC_012874.2	37706334	8.72482e-11	10.06	C/T	C:328_T:18	0.05
Spike length	lmm	NC_012874.2	37706658	8.72482e-11	10.06	A/G	A:328_G:18	0.05
Spike length	lmm	NC_012874.2	37709161	1.22728e-10	9.91	A/G	A:326_G:18	0.05
Spike length	lmm	NC_012874.2	37722880	5.21842e-11	10.28	A/G	A:326_G:18	0.05
Spike length	lmm	NC_012874.2	37723819	9.19592e-11	10.04	C/T	C:328_T:18	0.05
Spike length	lmm	NC_012874.2	37725037	7.44536e-11	10.13	A/T	A:326_T:18	0.05
Spike length	lmm	NC_012874.2	37731420	6.85992e-11	10.16	G/A	G:334_A:18	0.05
Spike length	lmm	NC_012874.2	37740649	1.11516e-10	9.95	C/T	C:326_T:18	0.05
Spike length	lmm	NC_012874.2	37742241	9.64806e-11	10.02	G/A	G:326_A:18	0.05
Spike length	lmm	NC_012874.2	37743714	9.64806e-11	10.02	C/T	C:326_T:18	0.05
Spike length	lmm	NC_012874.2	37780714	9.11429e-11	10.04	A/C	A:326_C:18	0.05
Spike length	lmm	NC_012874.2	37782068	8.72482e-11	10.06	C/T	C:326_T:18	0.05
Spike length	lmm	NC_012874.2	37785214	8.72482e-11	10.06	C/T	C:330_T:18	0.05
Spike length	lmm	NC_012874.2	37785431	2.9418e-09	8.53	A/T	A:325_T:19	0.06
Spike length	lmm	NC_012874.2	37785525	8.53753e-11	10.07	G/A	G:328_A:18	0.05
Spike length	lmm	NC_012874.2	37786601	7.10544e-11	10.15	G/C	G:328_C:18	0.05
Spike length	lmm	NC_012874.2	37789565	8.58702e-11	10.07	C/T	C:326_T:18	0.05
Spike length	lmm	NC_012874.2	37789948	8.53753e-11	10.07	T/G	T:326_G:18	0.05
Spike length	lmm	NC_012874.2	37791391	7.04156e-11	10.15	G/T	G:330_T:18	0.05
Spike length	lmm	NC_012874.2	37817791	8.72482e-11	10.06	G/T	G:326_T:18	0.05
Spike length	lmm	NC_012874.2	37820231	8.72482e-11	10.06	G/T	G:328_T:18	0.05
Spike length	lmm	NC_012874.2	37820825	8.72482e-11	10.06	G/T	G:328_T:18	0.05
Spike length	lmm	NC_012874.2	37822409	8.72482e-11	10.06	G/A	G:330_A:18	0.05
Spike length	lmm	NC_012874.2	37823333	8.72482e-11	10.06	C/G	C:326_G:18	0.05
Spike length	lmm	NC_012874.2	37824007	6.70622e-10	9.17	T/G	T:327_G:19	0.05
Spike length	lmm	NC_012874.2	37824015	8.72482e-11	10.06	T/A	T:328_A:18	0.05
Spike length	lmm	NC_012874.2	37824875	8.72482e-11	10.06	C/T	C:328_T:18	0.05
Spike length	lmm	NC_012874.2	37825006	8.72482e-11	10.06	G/A	G:330_A:18	0.05
Spike length	lmm	NC_012874.2	37825416	8.21483e-11	10.09	C/T	C:340_T:18	0.05
Spike length	lmm	NC_012874.2	37827863	7.2308e-11	10.14	C/T	C:332_T:18	0.05
Spike length	lmm	NC_012874.2	37828270	4.40783e-10	9.36	T/A	T:335_A:19	0.05
Spike length	lmm	NC_012874.2	37829738	6.70622e-10	9.17	C/G	C:327_G:19	0.05
Spike length	lmm	NC_012874.2	37829746	6.70622e-10	9.17	A/G	A:327_G:19	0.05
Spike length	lmm	NC_012874.2	37835111	8.72482e-11	10.06	G/T	G:328_T:18	0.05
Spike length	lmm	NC_012874.2	37836079	6.37048e-11	10.2	T/A	T:328_A:18	0.05
Spike length	lmm	NC_012874.2	37836325	8.72482e-11	10.06	T/A	T:328_A:18	0.05
Spike length	lmm	NC_012874.2	37837679	8.72482e-11	10.06	T/C	T:328_C:18	0.05
Spike length	lmm	NC_012874.2	37838486	7.80118e-11	10.11	C/T	C:328_T:18	0.05
Spike length	lmm	NC_012874.2	37839394	9.87205e-11	10.01	T/A	T:326_A:18	0.05
Spike length	lmm	NC_012874.2	37839489	8.72482e-11	10.06	G/A	G:328_A:18	0.05
Spike length	lmm	NC_012874.2	37839875	8.72482e-11	10.06	T/A	T:326_A:18	0.05
Spike length	lmm	NC_012874.2	37840269	6.76079e-11	10.17	T/C	T:330_C:18	0.05
Spike length	lmm	NC_012874.2	37853928	8.72482e-11	10.06	C/T	C:328_T:18	0.05
Spike length	lmm	NC_012874.2	37857705	3.919e-09	8.41	C/G	C:326_G:18	0.05
Spike length	lmm	NC_012874.2	37872847	9.18404e-11	10.04	G/T	G:326_T:18	0.05
Spike length	lmm	NC_012874.2	37875496	8.72482e-11	10.06	A/G	A:328_G:18	0.05
Spike length	lmm	NC_012874.2	37875858	8.72482e-11	10.06	C/T	C:328_T:18	0.05
Spike length	lmm	NC_012874.2	37876296	8.72482e-11	10.06	G/A	G:328_A:18	0.05
Spike length	lmm	NC_012874.2	37876726	8.72482e-11	10.06	A/C	A:330_C:18	0.05
Spike length	lmm	NC_012874.2	37877310	9.96358e-11	10	G/A	G:328_A:18	0.05
Spike length	lmm	NC_012874.2	37878180	8.44158e-11	10.07	G/A	G:328_A:18	0.05
Spike length	lmm	NC_012874.2	37961403	8.72482e-11	10.06	C/T	C:328_T:18	0.05
Spike length	lmm	NC_012874.2	37964979	1.07771e-10	9.97	T/A	T:328_A:18	0.05
Spike length	lmm	NC_012874.2	37965049	8.72482e-11	10.06	G/T	G:330_T:18	0.05
Spike length	lmm	NC_012874.2	37965813	8.72482e-11	10.06	A/C	A:330_C:18	0.05
Spike length	lmm	NC_012874.2	37966506	9.62814e-11	10.02	G/A	G:326_A:18	0.05
Spike length	lmm	NC_012874.2	37966708	8.72482e-11	10.06	T/A	T:328_A:18	0.05
Spike length	lmm	NC_012874.2	37969572	7.16336e-11	10.14	G/T	G:326_T:18	0.05
Spike length	lmm	NC_012874.2	37969666	8.72482e-11	10.06	C/T	C:326_T:18	0.05
Spike length	lmm	NC_012874.2	37970906	8.72482e-11	10.06	T/C	T:330_C:18	0.05
Spike length	lmm	NC_012874.2	37972180	8.72482e-11	10.06	G/A	G:326_A:18	0.05
Spike length	lmm	NC_012874.2	37972231	8.72482e-11	10.06	G/A	G:326_A:18	0.05
Spike length	lmm	NC_012874.2	37975243	8.72482e-11	10.06	G/T	G:326_T:18	0.05
Spike length	lmm	NC_012874.2	37976355	7.99441e-11	10.1	C/G	C:330_G:18	0.05
Spike length	lmm	NC_012874.2	37992870	8.72482e-11	10.06	G/A	G:330_A:18	0.05
Spike length	lmm	NC_012874.2	37993307	8.72482e-11	10.06	G/A	G:328_A:18	0.05
Spike length	lmm	NC_012874.2	37998383	8.53753e-11	10.07	A/G	A:326_G:18	0.05
Spike length	lmm	NC_012874.2	38000037	8.72482e-11	10.06	C/T	C:326_T:18	0.05
Spike length	lmm	NC_012874.2	38000683	8.72482e-11	10.06	G/T	G:326_T:18	0.05
Spike length	lmm	NC_012874.2	38002686	8.53753e-11	10.07	C/T	C:326_T:18	0.05
Spike length	lmm	NC_012874.2	38002747	8.53753e-11	10.07	C/A	C:326_A:18	0.05
Spike length	lmm	NC_012874.2	38002769	8.53753e-11	10.07	A/G	A:326_G:18	0.05
Spike length	lmm	NC_012874.2	38003300	8.53753e-11	10.07	G/A	G:326_A:18	0.05
Spike length	lmm	NC_012874.2	38003367	8.53753e-11	10.07	A/G	A:326_G:18	0.05
Spike length	lmm	NC_012874.2	38003480	8.53753e-11	10.07	A/G	A:326_G:18	0.05
Spike length	lmm	NC_012874.2	38003630	8.53753e-11	10.07	G/T	G:326_T:18	0.05
Spike length	lmm	NC_012874.2	38004152	8.72482e-11	10.06	G/A	G:330_A:18	0.05
Spike length	lmm	NC_012874.2	38004268	8.72482e-11	10.06	C/T	C:328_T:18	0.05
Spike length	lmm	NC_012874.2	38004428	8.72482e-11	10.06	C/T	C:326_T:18	0.05
Spike length	lmm	NC_012874.2	38014427	8.72482e-11	10.06	G/T	G:328_T:18	0.05
Spike length	lmm	NC_012874.2	38015749	1.05182e-10	9.98	G/A	G:328_A:18	0.05
Spike length	lmm	NC_012874.2	38015905	1.05182e-10	9.98	G/A	G:328_A:18	0.05
Spike length	lmm	NC_012874.2	38017256	3.33026e-08	7.48	C/A	C:335_A:19	0.05
Spike length	lmm	NC_012874.2	38019806	8.72482e-11	10.06	G/A	G:328_A:18	0.05
Spike length	lmm	NC_012874.2	38025005	4.59263e-11	10.34	C/T	C:336_T:18	0.05
Spike length	lmm	NC_012874.2	38026847	7.79606e-11	10.11	G/T	G:332_T:18	0.05
Spike length	lmm	NC_012874.2	38028076	9.05114e-11	10.04	C/T	C:336_T:18	0.05
Spike length	lmm	NC_012874.2	38042179	1.2008e-10	9.92	C/T	C:330_T:18	0.05
Spike length	lmm	NC_012874.2	38042715	8.37599e-11	10.08	C/T	C:336_T:18	0.05
Spike length	lmm	NC_012874.2	38043083	7.74039e-11	10.11	G/A	G:340_A:18	0.05
Spike length	lmm	NC_012874.2	38044428	1.12872e-10	9.95	G/A	G:328_A:18	0.05
Spike length	lmm	NC_012874.2	38044565	8.72482e-11	10.06	C/T	C:326_T:18	0.05
Spike length	lmm	NC_012874.2	38045058	8.58702e-11	10.07	G/A	G:328_A:18	0.05
Spike length	lmm	NC_012874.2	38045229	8.72482e-11	10.06	C/T	C:328_T:18	0.05
Spike length	lmm	NC_012874.2	38045577	8.72482e-11	10.06	C/T	C:330_T:18	0.05
Spike length	lmm	NC_012874.2	38045932	7.44451e-11	10.13	G/A	G:332_A:18	0.05
Spike length	lmm	NC_012874.2	38046098	7.44451e-11	10.13	C/A	C:330_A:18	0.05
Spike length	lmm	NC_012874.2	38046561	8.72482e-11	10.06	C/T	C:328_T:18	0.05
Spike length	lmm	NC_012874.2	38048416	8.72482e-11	10.06	G/A	G:326_A:18	0.05
Spike length	lmm	NC_012874.2	38050480	8.72482e-11	10.06	G/A	G:328_A:18	0.05
Spike length	lmm	NC_012874.2	38050918	8.53753e-11	10.07	A/C	A:326_C:18	0.05
Spike length	lmm	NC_012874.2	38051606	8.72482e-11	10.06	T/C	T:326_C:18	0.05
Spike length	lmm	NC_012874.2	38052463	6.01052e-11	10.22	G/A	G:340_A:18	0.05
Spike length	lmm	NC_012874.2	38054151	8.72482e-11	10.06	G/A	G:326_A:18	0.05
Spike length	lmm	NC_012874.2	38054609	6.76079e-11	10.17	G/T	G:330_T:18	0.05
Spike length	lmm	NC_012874.2	38054933	6.2453e-11	10.2	T/G	T:326_G:18	0.05
Spike length	lmm	NC_012874.2	38055446	8.72482e-11	10.06	A/G	A:326_G:18	0.05
Spike length	lmm	NC_012874.2	38055914	8.72482e-11	10.06	A/C	A:330_C:18	0.05
Spike length	lmm	NC_012874.2	38057877	1.33711e-10	9.87	G/A	G:326_A:18	0.05
Spike length	lmm	NC_012874.2	38058344	7.3863e-11	10.13	C/G	C:326_G:18	0.05
Spike length	lmm	NC_012874.2	38058396	8.72482e-11	10.06	A/G	A:328_G:18	0.05
Spike length	lmm	NC_012874.2	38058653	8.72482e-11	10.06	C/T	C:330_T:18	0.05
Spike length	lmm	NC_012874.2	38060975	8.72482e-11	10.06	A/C	A:330_C:18	0.05
Spike length	lmm	NC_012874.2	38061006	8.72482e-11	10.06	T/A	T:328_A:18	0.05
Spike length	lmm	NC_012874.2	38061136	9.6318e-11	10.02	T/G	T:334_G:18	0.05
Spike length	lmm	NC_012874.2	38061864	6.13641e-11	10.21	C/T	C:334_T:18	0.05
Spike length	lmm	NC_012874.2	38062974	8.72482e-11	10.06	A/G	A:328_G:18	0.05
Spike length	lmm	NC_012874.2	38063188	8.72482e-11	10.06	C/T	C:328_T:18	0.05
Spike length	lmm	NC_012874.2	38064863	5.00634e-09	8.3	T/A	T:318_A:28	0.08
Spike length	lmm	NC_012874.2	38065659	8.72482e-11	10.06	C/T	C:328_T:18	0.05
Spike length	lmm	NC_012874.2	38079969	8.5174e-11	10.07	G/A	G:328_A:18	0.05
Spike length	lmm	NC_012874.2	38081940	8.72482e-11	10.06	C/A	C:326_A:18	0.05
Spike length	lmm	NC_012874.2	38086366	8.72482e-11	10.06	T/A	T:326_A:18	0.05
Spike length	lmm	NC_012874.2	38086652	8.72482e-11	10.06	C/A	C:328_A:18	0.05
Spike length	lmm	NC_012874.2	38087335	8.72482e-11	10.06	G/A	G:328_A:18	0.05
Spike length	lmm	NC_012874.2	38096316	8.72482e-11	10.06	A/G	A:326_G:18	0.05
Spike length	lmm	NC_012874.2	38096811	6.76079e-11	10.17	G/A	G:328_A:18	0.05
Spike length	lmm	NC_012874.2	38097382	3.06498e-08	7.51	T/G	T:325_G:19	0.06
Spike length	lmm	NC_012874.2	38101495	8.72482e-11	10.06	T/A	T:326_A:18	0.05
Spike length	lmm	NC_012874.2	38103685	8.72482e-11	10.06	G/A	G:326_A:18	0.05
Spike length	lmm	NC_012874.2	38104428	8.72482e-11	10.06	C/G	C:326_G:18	0.05
Spike length	lmm	NC_012874.2	38107246	8.72482e-11	10.06	C/T	C:328_T:18	0.05
Spike length	lmm	NC_012874.2	38118978	8.72482e-11	10.06	G/A	G:328_A:18	0.05
Spike length	lmm	NC_012874.2	38122611	8.53753e-11	10.07	C/T	C:326_T:18	0.05
Spike length	lmm	NC_012874.2	38123158	8.72482e-11	10.06	G/T	G:326_T:18	0.05
Spike length	lmm	NC_012874.2	38123544	8.72482e-11	10.06	C/T	C:328_T:18	0.05
Spike length	lmm	NC_012874.2	38123649	8.72482e-11	10.06	C/T	C:326_T:18	0.05
Spike length	lmm	NC_012874.2	38123723	8.72482e-11	10.06	T/G	T:330_G:18	0.05
Spike length	lmm	NC_012874.2	38125114	8.72482e-11	10.06	A/T	A:330_T:18	0.05
Spike length	lmm	NC_012874.2	38125432	1.30688e-08	7.88	G/A	G:332_A:18	0.05
Spike length	lmm	NC_012874.2	38132032	7.37756e-11	10.13	C/G	C:336_G:18	0.05
Spike length	lmm	NC_012874.2	38132525	2.58583e-08	7.59	T/C	T:325_C:21	0.06
Spike length	lmm	NC_012874.2	38133535	8.72482e-11	10.06	A/T	A:328_T:18	0.05
Spike length	lmm	NC_012874.2	38133984	8.47342e-11	10.07	A/G	A:326_G:18	0.05
Spike length	lmm	NC_012874.2	38136064	4.71952e-11	10.33	G/A	G:336_A:18	0.05
Spike length	lmm	NC_012874.2	38139899	1.21304e-10	9.92	G/A	G:326_A:18	0.05
Spike length	lmm	NC_012874.2	38140209	2.8383e-09	8.55	A/G	A:331_G:19	0.05
Spike length	lmm	NC_012874.2	38154332	1.39811e-10	9.85	C/T	C:328_T:18	0.05
Spike length	lmm	NC_012874.2	38154738	8.72482e-11	10.06	G/T	G:326_T:18	0.05
Spike length	lmm	NC_012874.2	38158430	8.72482e-11	10.06	C/A	C:326_A:18	0.05
Spike length	lmm	NC_012874.2	38161610	1.18896e-10	9.92	G/T	G:326_T:18	0.05
Spike length	lmm	NC_012874.2	38163167	7.59267e-11	10.12	G/A	G:330_A:18	0.05
Spike length	lmm	NC_012874.2	38165331	8.04731e-11	10.09	G/A	G:328_A:18	0.05
Spike length	lmm	NC_012874.2	38170625	8.72482e-11	10.06	A/G	A:328_G:18	0.05
Spike length	lmm	NC_012874.2	38171124	8.09476e-11	10.09	C/T	C:332_T:18	0.05
Spike length	lmm	NC_012874.2	38173141	8.72482e-11	10.06	C/A	C:328_A:18	0.05
Spike length	lmm	NC_012874.2	38173460	1.08159e-10	9.97	C/T	C:328_T:18	0.05
Spike length	lmm	NC_012874.2	38173609	6.84631e-11	10.16	G/A	G:326_A:18	0.05
Spike length	lmm	NC_012874.2	38174492	8.72482e-11	10.06	A/T	A:330_T:18	0.05
Spike length	lmm	NC_012874.2	38181488	4.83783e-11	10.32	G/A	G:330_A:18	0.05
Spike length	lmm	NC_012874.2	38181946	8.72482e-11	10.06	G/A	G:328_A:18	0.05
Spike length	lmm	NC_012874.2	38190511	7.23933e-11	10.14	C/T	C:326_T:18	0.05
Spike length	lmm	NC_012874.2	38192274	6.01687e-11	10.22	G/A	G:332_A:18	0.05
Spike length	lmm	NC_012874.2	38192526	8.00115e-11	10.1	G/A	G:328_A:18	0.05
Spike length	lmm	NC_012874.2	38195050	7.64572e-11	10.12	G/T	G:336_T:18	0.05
Spike length	lmm	NC_012874.2	38195069	8.18979e-11	10.09	G/T	G:338_T:18	0.05
Spike length	lmm	NC_012874.2	38197068	8.28567e-11	10.08	A/T	A:328_T:18	0.05
Spike length	lmm	NC_012874.2	38202308	8.28567e-11	10.08	G/A	G:326_A:18	0.05
Spike length	lmm	NC_012874.2	38202359	8.28567e-11	10.08	G/T	G:326_T:18	0.05
Spike length	lmm	NC_012874.2	38203534	8.72482e-11	10.06	G/A	G:330_A:18	0.05
Spike length	lmm	NC_012874.2	38203760	4.45401e-11	10.35	G/A	G:330_A:18	0.05
Spike length	lmm	NC_012874.2	38204139	5.91682e-11	10.23	C/T	C:338_T:18	0.05
Spike length	lmm	NC_012874.2	38217277	7.81625e-11	10.11	A/G	A:330_G:18	0.05
Spike length	lmm	NC_012874.2	38224103	8.72482e-11	10.06	G/C	G:328_C:18	0.05
Spike length	lmm	NC_012874.2	38225979	8.72482e-11	10.06	A/T	A:330_T:18	0.05
Spike length	lmm	NC_012874.2	38225990	8.72482e-11	10.06	C/T	C:330_T:18	0.05
Spike length	lmm	NC_012874.2	38226760	1.03479e-10	9.99	A/T	A:328_T:18	0.05
Spike length	lmm	NC_012874.2	38227037	8.8053e-11	10.06	C/T	C:326_T:18	0.05
Spike length	lmm	NC_012874.2	38230127	8.53753e-11	10.07	G/A	G:326_A:18	0.05
Spike length	lmm	NC_012874.2	38238165	4.49457e-11	10.35	G/A	G:340_A:18	0.05
Spike length	lmm	NC_012874.2	38240904	8.72482e-11	10.06	T/G	T:328_G:18	0.05
Spike length	lmm	NC_012874.2	38245899	8.72482e-11	10.06	G/A	G:328_A:18	0.05
Spike length	lmm	NC_012874.2	38246549	8.4891e-11	10.07	C/T	C:332_T:18	0.05
Spike length	lmm	NC_012874.2	38247502	1.55748e-10	9.81	T/C	T:332_C:18	0.05
Spike length	lmm	NC_012874.2	38247731	8.72482e-11	10.06	G/A	G:330_A:18	0.05
Spike length	lmm	NC_012874.2	38248157	8.72482e-11	10.06	A/G	A:328_G:18	0.05
Spike length	lmm	NC_012874.2	38248186	8.53753e-11	10.07	G/A	G:328_A:18	0.05
Spike length	lmm	NC_012874.2	38249257	1.74688e-11	10.76	T/G	T:328_G:18	0.05
Spike length	lmm	NC_012874.2	38249355	6.76079e-11	10.17	G/A	G:332_A:18	0.05
Spike length	lmm	NC_012874.2	38250883	8.77571e-11	10.06	G/A	G:334_A:18	0.05
Spike length	lmm	NC_012874.2	38252016	6.6249e-11	10.18	A/G	A:328_G:18	0.05
Spike length	lmm	NC_012876.2	38252469	7.48631e-09	8.13	T/C	T:208_C:220	0.49
Spike length	lmm	NC_012876.2	38252724	7.48631e-09	8.13	A/G	A:208_G:220	0.49
Spike length	lmm	NC_012874.2	38261578	8.72482e-11	10.06	T/C	T:330_C:18	0.05
Spike length	lmm	NC_012874.2	38262756	8.72482e-11	10.06	G/A	G:328_A:18	0.05
Spike length	lmm	NC_012874.2	38713955	8.72482e-11	10.06	C/G	C:328_G:18	0.05
Spike length	lmm	NC_012874.2	38715209	8.72482e-11	10.06	G/A	G:328_A:18	0.05
Spike length	lmm	NC_012874.2	38715305	8.72482e-11	10.06	G/T	G:326_T:18	0.05
Spike length	lmm	NC_012874.2	38716328	1.10721e-10	9.96	C/A	C:326_A:18	0.05
Spike length	lmm	NC_012874.2	38717429	8.72482e-11	10.06	G/T	G:328_T:18	0.05
Spike length	lmm	NC_012874.2	38718572	8.72482e-11	10.06	T/C	T:330_C:18	0.05
Spike length	lmm	NC_012874.2	38718766	8.72482e-11	10.06	G/T	G:328_T:18	0.05
Spike length	lmm	NC_012874.2	38718887	8.72482e-11	10.06	T/G	T:326_G:18	0.05
Spike length	lmm	NC_012874.2	38718924	8.72482e-11	10.06	G/A	G:328_A:18	0.05
Spike length	lmm	NC_012874.2	38720072	8.94055e-11	10.05	A/C	A:328_C:18	0.05
Spike length	lmm	NC_012874.2	38720490	8.72482e-11	10.06	C/T	C:328_T:18	0.05
Spike length	lmm	NC_012874.2	38721082	8.72482e-11	10.06	G/A	G:328_A:18	0.05
Spike length	lmm	NC_012874.2	38729796	1.47212e-10	9.83	G/A	G:326_A:18	0.05
Spike length	lmm	NC_012874.2	38730695	1.47212e-10	9.83	G/A	G:326_A:18	0.05
Spike length	lmm	NC_012874.2	38730844	8.72482e-11	10.06	C/T	C:328_T:18	0.05
Spike length	lmm	NC_012874.2	38732675	1.47212e-10	9.83	G/A	G:328_A:18	0.05
Spike length	lmm	NC_012874.2	38732774	1.47212e-10	9.83	G/A	G:326_A:18	0.05
Spike length	lmm	NC_012874.2	38735662	1.47212e-10	9.83	C/T	C:326_T:18	0.05
Spike length	lmm	NC_012874.2	38736702	1.00968e-10	10	C/T	C:330_T:18	0.05
Spike length	lmm	NC_012874.2	38738358	1.47212e-10	9.83	G/A	G:326_A:18	0.05
Spike length	lmm	NC_012874.2	38740364	8.72482e-11	10.06	G/A	G:328_A:18	0.05
Spike length	lmm	NC_012874.2	38752505	8.72482e-11	10.06	G/A	G:328_A:18	0.05
Spike length	lmm	NC_012874.2	38753080	9.19891e-11	10.04	G/A	G:326_A:18	0.05
Spike length	lmm	NC_012874.2	38753092	9.19891e-11	10.04	G/A	G:326_A:18	0.05
Spike length	lmm	NC_012874.2	38753215	1.03428e-10	9.99	C/A	C:328_A:18	0.05
Spike length	lmm	NC_012874.2	38753236	8.66191e-11	10.06	T/A	T:332_A:18	0.05
Spike length	lmm	NC_012874.2	38754177	8.72482e-11	10.06	G/A	G:328_A:18	0.05
Spike length	lmm	NC_012874.2	38755099	8.72482e-11	10.06	C/T	C:330_T:18	0.05
Spike length	lmm	NC_012874.2	38755230	8.72482e-11	10.06	G/T	G:326_T:18	0.05
Spike length	lmm	NC_012874.2	38755393	8.72482e-11	10.06	G/A	G:328_A:18	0.05
Spike length	lmm	NC_012874.2	38755443	8.72482e-11	10.06	T/C	T:328_C:18	0.05
Spike length	lmm	NC_012874.2	38755482	8.72482e-11	10.06	G/A	G:328_A:18	0.05
Spike length	lmm	NC_012874.2	38756174	8.72482e-11	10.06	C/T	C:330_T:18	0.05
Spike length	lmm	NC_012874.2	38756980	8.72482e-11	10.06	A/G	A:326_G:18	0.05
Spike length	lmm	NC_012874.2	38757060	8.72482e-11	10.06	G/C	G:330_C:18	0.05
Spike length	lmm	NC_012874.2	38757272	5.56816e-11	10.25	G/A	G:328_A:18	0.05
Spike length	lmm	NC_012874.2	38757838	8.72482e-11	10.06	T/C	T:328_C:18	0.05
Spike length	lmm	NC_012874.2	38759651	9.19891e-11	10.04	C/A	C:326_A:18	0.05
Spike length	lmm	NC_012874.2	38759846	9.45762e-09	8.02	G/A	G:330_A:20	0.06
Spike length	lmm	NC_012874.2	38759980	7.55278e-11	10.12	T/C	T:330_C:18	0.05
Spike length	lmm	NC_012874.2	38760325	8.72482e-11	10.06	C/A	C:330_A:18	0.05
Spike length	lmm	NC_012874.2	38762322	8.53753e-11	10.07	G/A	G:328_A:18	0.05
Spike length	lmm	NC_012874.2	38763966	8.00814e-11	10.1	C/T	C:326_T:18	0.05
Spike length	lmm	NC_012874.2	38766752	8.72482e-11	10.06	G/C	G:328_C:18	0.05
Spike length	lmm	NC_012874.2	38768731	8.53753e-11	10.07	C/T	C:326_T:18	0.05
Spike length	lmm	NC_012874.2	38769793	8.72482e-11	10.06	C/G	C:328_G:18	0.05
Spike length	lmm	NC_012874.2	38770854	8.72482e-11	10.06	A/G	A:328_G:18	0.05
Spike length	lmm	NC_012874.2	38776514	8.72482e-11	10.06	A/T	A:326_T:18	0.05
Spike length	lmm	NC_012874.2	38777141	5.86428e-11	10.23	C/T	C:330_T:18	0.05
Spike length	lmm	NC_012874.2	38778363	8.58193e-11	10.07	G/A	G:328_A:18	0.05
Spike length	lmm	NC_012874.2	38778630	8.72482e-11	10.06	T/A	T:330_A:18	0.05
Spike length	lmm	NC_012874.2	38779899	8.72482e-11	10.06	T/A	T:330_A:18	0.05
Spike length	lmm	NC_012874.2	38780586	8.72482e-11	10.06	G/A	G:326_A:18	0.05
Spike length	lmm	NC_012874.2	38780612	8.72482e-11	10.06	G/A	G:328_A:18	0.05
Spike length	lmm	NC_012874.2	38784270	8.72482e-11	10.06	G/A	G:326_A:18	0.05
Spike length	lmm	NC_012874.2	38784936	8.72482e-11	10.06	C/T	C:328_T:18	0.05
Spike length	lmm	NC_012874.2	38785126	8.27591e-11	10.08	G/A	G:330_A:18	0.05
Spike length	lmm	NC_012874.2	38787871	6.70622e-10	9.17	G/C	G:325_C:19	0.06
Spike length	lmm	NC_012874.2	38788090	7.7422e-10	9.11	G/C	G:335_C:19	0.05
Spike length	lmm	NC_012874.2	38789125	8.72482e-11	10.06	C/T	C:328_T:18	0.05
Spike length	lmm	NC_012874.2	38789286	8.72482e-11	10.06	G/T	G:330_T:18	0.05
Spike length	lmm	NC_012874.2	38789466	8.72482e-11	10.06	G/A	G:328_A:18	0.05
Spike length	lmm	NC_012874.2	38790526	8.72482e-11	10.06	C/T	C:328_T:18	0.05
Spike length	lmm	NC_012874.2	38790577	8.72482e-11	10.06	C/T	C:328_T:18	0.05
Spike length	lmm	NC_012874.2	38791449	7.00635e-11	10.15	C/T	C:328_T:18	0.05
Spike length	lmm	NC_012874.2	38792204	8.72482e-11	10.06	G/A	G:328_A:18	0.05
Spike length	lmm	NC_012874.2	38792622	8.72482e-11	10.06	A/T	A:326_T:18	0.05
Spike length	lmm	NC_012874.2	38792935	8.72482e-11	10.06	A/G	A:328_G:18	0.05
Spike length	lmm	NC_012874.2	38794719	8.72482e-11	10.06	C/A	C:330_A:18	0.05
Spike length	lmm	NC_012874.2	38795037	8.72482e-11	10.06	G/A	G:330_A:18	0.05
Spike length	lmm	NC_012874.2	38795648	8.72482e-11	10.06	G/A	G:326_A:18	0.05
Spike length	lmm	NC_012874.2	38795748	8.72482e-11	10.06	G/C	G:326_C:18	0.05
Spike length	lmm	NC_012874.2	38795856	8.72482e-11	10.06	G/C	G:330_C:18	0.05
Spike length	lmm	NC_012874.2	38795868	8.72482e-11	10.06	C/G	C:328_G:18	0.05
Spike length	lmm	NC_012874.2	38799001	5.34929e-11	10.27	T/C	T:328_C:18	0.05
Spike length	lmm	NC_012874.2	38799161	8.72482e-11	10.06	C/A	C:328_A:18	0.05
Spike length	lmm	NC_012874.2	38799482	6.59538e-11	10.18	G/T	G:334_T:18	0.05
Spike length	lmm	NC_012874.2	38799990	8.28567e-11	10.08	G/A	G:326_A:18	0.05
Spike length	lmm	NC_012874.2	38802844	7.70952e-11	10.11	C/G	C:330_G:18	0.05
Spike length	lmm	NC_012874.2	38802878	7.70952e-11	10.11	C/G	C:330_G:18	0.05
Spike length	lmm	NC_012874.2	38807515	8.72482e-11	10.06	T/A	T:328_A:18	0.05
Spike length	lmm	NC_012874.2	38809936	8.72482e-11	10.06	C/T	C:326_T:18	0.05
Spike length	lmm	NC_012874.2	38811313	1.28131e-10	9.89	C/A	C:336_A:18	0.05
Spike length	lmm	NC_012874.2	38815454	8.53753e-11	10.07	C/A	C:326_A:18	0.05
Spike length	lmm	NC_012874.2	38816884	1.01069e-10	10	G/A	G:326_A:18	0.05
Spike length	lmm	NC_012874.2	38817158	8.53753e-11	10.07	C/T	C:326_T:18	0.05
Spike length	lmm	NC_012874.2	38819289	8.72482e-11	10.06	G/T	G:328_T:18	0.05
Spike length	lmm	NC_012874.2	38819634	9.14708e-11	10.04	T/A	T:326_A:18	0.05
Spike length	lmm	NC_012874.2	38821997	1.56099e-10	9.81	C/T	C:326_T:18	0.05
Spike length	lmm	NC_012874.2	38826430	7.26593e-11	10.14	C/T	C:332_T:18	0.05
Spike length	lmm	NC_012874.2	38828195	8.72482e-11	10.06	C/A	C:328_A:18	0.05
Spike length	lmm	NC_012874.2	38834512	8.72482e-11	10.06	G/A	G:328_A:18	0.05
Spike length	lmm	NC_012874.2	38835185	9.58952e-11	10.02	C/T	C:332_T:18	0.05
Spike length	lmm	NC_012874.2	38835347	8.72482e-11	10.06	G/A	G:328_A:18	0.05
Spike length	lmm	NC_012874.2	38835637	8.72482e-11	10.06	C/G	C:328_G:18	0.05
Spike length	lmm	NC_012874.2	38835668	8.72482e-11	10.06	A/C	A:328_C:18	0.05
Spike length	lmm	NC_012874.2	38836015	1.02944e-10	9.99	A/G	A:326_G:18	0.05
Spike length	lmm	NC_012874.2	38836380	8.72482e-11	10.06	C/T	C:326_T:18	0.05
Spike length	lmm	NC_012874.2	38838431	8.72482e-11	10.06	T/A	T:330_A:18	0.05
Spike length	lmm	NC_012874.2	38839021	8.72482e-11	10.06	C/T	C:326_T:18	0.05
Spike length	lmm	NC_012874.2	38840922	8.72482e-11	10.06	A/G	A:326_G:18	0.05
Spike length	lmm	NC_012874.2	38841621	8.72482e-11	10.06	C/A	C:328_A:18	0.05
Spike length	lmm	NC_012874.2	38841985	1.24384e-10	9.91	A/T	A:326_T:18	0.05
Spike length	lmm	NC_012874.2	38843080	3.30351e-11	10.48	C/T	C:331_T:19	0.05
Spike length	lmm	NC_012874.2	38843362	8.72482e-11	10.06	G/T	G:326_T:18	0.05
Spike length	lmm	NC_012874.2	38852113	8.72482e-11	10.06	G/A	G:326_A:18	0.05
Spike length	lmm	NC_012874.2	38855375	8.72482e-11	10.06	C/T	C:328_T:18	0.05
Spike length	lmm	NC_012874.2	38856562	8.72482e-11	10.06	A/T	A:326_T:18	0.05
Spike length	lmm	NC_012874.2	38857891	2.31202e-10	9.64	C/T	C:330_T:18	0.05
Spike length	lmm	NC_012874.2	38858434	6.91983e-11	10.16	G/C	G:328_C:18	0.05
Spike length	lmm	NC_012874.2	38859585	8.72482e-11	10.06	C/T	C:328_T:18	0.05
Spike length	lmm	NC_012874.2	38859636	8.72482e-11	10.06	T/G	T:328_G:18	0.05
Spike length	lmm	NC_012874.2	38859759	8.72482e-11	10.06	G/A	G:328_A:18	0.05
Spike length	lmm	NC_012874.2	38861237	8.72482e-11	10.06	G/A	G:330_A:18	0.05
Spike length	lmm	NC_012874.2	38863235	8.72482e-11	10.06	G/A	G:328_A:18	0.05
Spike length	lmm	NC_012874.2	38864968	8.72482e-11	10.06	C/T	C:326_T:18	0.05
Spike length	lmm	NC_012874.2	38883844	6.72834e-11	10.17	T/C	T:342_C:18	0.05
Spike length	lmm	NC_012874.2	38884170	1.16305e-10	9.93	G/A	G:330_A:18	0.05
Spike length	lmm	NC_012874.2	38886061	9.17162e-11	10.04	C/A	C:326_A:18	0.05
Spike length	lmm	NC_012874.2	38886093	8.72482e-11	10.06	G/A	G:330_A:18	0.05
Spike length	lmm	NC_012874.2	38886405	8.72482e-11	10.06	C/T	C:328_T:18	0.05
Spike length	lmm	NC_012874.2	38887149	8.72482e-11	10.06	G/A	G:326_A:18	0.05
Spike length	lmm	NC_012874.2	38888738	8.72482e-11	10.06	C/T	C:330_T:18	0.05
Spike length	lmm	NC_012874.2	38889898	6.76079e-11	10.17	G/T	G:330_T:18	0.05
Spike length	lmm	NC_012874.2	38890011	8.72482e-11	10.06	C/T	C:328_T:18	0.05
Spike length	lmm	NC_012874.2	38895599	8.72482e-11	10.06	G/A	G:326_A:18	0.05
Spike length	lmm	NC_012874.2	38898723	6.44774e-10	9.19	A/G	A:325_G:19	0.06
Spike length	lmm	NC_012874.2	38898753	6.63061e-11	10.18	C/T	C:328_T:18	0.05
Spike length	lmm	NC_012874.2	38909630	8.72482e-11	10.06	G/T	G:328_T:18	0.05
Spike length	lmm	NC_012874.2	38909752	8.72482e-11	10.06	T/C	T:328_C:18	0.05
Spike length	lmm	NC_012874.2	38909901	2.73354e-09	8.56	T/C	T:325_C:21	0.06
Spike length	lmm	NC_012874.2	38910802	7.91257e-11	10.1	A/T	A:328_T:18	0.05
Spike length	lmm	NC_012874.2	38912175	8.72482e-11	10.06	G/A	G:328_A:18	0.05
Spike length	lmm	NC_012874.2	38915408	8.72482e-11	10.06	C/T	C:328_T:18	0.05
Spike length	lmm	NC_012874.2	38915580	8.53753e-11	10.07	G/C	G:326_C:18	0.05
Spike length	lmm	NC_012874.2	38919417	4.04593e-11	10.39	G/T	G:338_T:18	0.05
Spike length	lmm	NC_012874.2	38922450	6.41143e-11	10.19	G/A	G:328_A:18	0.05
Spike length	lmm	NC_012874.2	38922790	8.72482e-11	10.06	C/T	C:328_T:18	0.05
Spike length	lmm	NC_012874.2	38930842	8.81464e-11	10.05	C/T	C:326_T:18	0.05
Spike length	lmm	NC_012874.2	38931417	8.00115e-11	10.1	A/T	A:330_T:18	0.05
Spike length	lmm	NC_012874.2	38932048	6.43928e-11	10.19	A/G	A:326_G:18	0.05
Spike length	lmm	NC_012874.2	38932402	9.44962e-11	10.02	T/C	T:326_C:18	0.05
Spike length	lmm	NC_012874.2	38933594	8.66191e-11	10.06	A/T	A:330_T:18	0.05
Spike length	lmm	NC_012874.2	38934146	6.76079e-11	10.17	G/C	G:330_C:18	0.05
Spike length	lmm	NC_012874.2	38934757	7.99441e-11	10.1	G/A	G:328_A:18	0.05
Spike length	lmm	NC_012874.2	38936171	6.12059e-09	8.21	T/A	T:347_A:19	0.05
Spike length	lmm	NC_012874.2	38936530	1.34339e-10	9.87	A/C	A:336_C:18	0.05
Spike length	lmm	NC_012874.2	38936913	8.00115e-11	10.1	G/A	G:328_A:18	0.05
Spike length	lmm	NC_012874.2	38938680	7.13395e-11	10.15	G/A	G:334_A:18	0.05
Spike length	lmm	NC_012874.2	38939894	8.72482e-11	10.06	G/A	G:326_A:18	0.05
Spike length	lmm	NC_012874.2	38942444	8.72482e-11	10.06	G/C	G:326_C:18	0.05
Spike length	lmm	NC_012874.2	38943052	7.17854e-11	10.14	C/T	C:332_T:18	0.05
Spike length	lmm	NC_012874.2	38943256	8.72482e-11	10.06	G/T	G:328_T:18	0.05
Spike length	lmm	NC_012874.2	38945502	8.70406e-11	10.06	T/A	T:330_A:18	0.05
Spike length	lmm	NC_012874.2	38950488	8.72482e-11	10.06	C/T	C:328_T:18	0.05
Spike length	lmm	NC_012874.2	38960364	2.40215e-08	7.62	T/C	T:322_C:22	0.06
Spike length	lmm	NC_012874.2	38961009	8.73108e-11	10.06	G/A	G:328_A:18	0.05
Spike length	lmm	NC_012874.2	39427883	9.38211e-11	10.03	C/A	C:326_A:18	0.05
Spike length	lmm	NC_012874.2	39428770	8.72482e-11	10.06	G/A	G:328_A:18	0.05
Spike length	lmm	NC_012874.2	39431008	5.33119e-11	10.27	T/G	T:328_G:18	0.05
Spike length	lmm	NC_012874.2	39781260	8.72482e-11	10.06	C/T	C:328_T:18	0.05
Spike length	lmm	NC_012874.2	39781315	9.62652e-11	10.02	C/G	C:326_G:18	0.05
Spike length	lmm	NC_012874.2	39781480	8.72482e-11	10.06	C/T	C:328_T:18	0.05
Spike length	lmm	NC_012874.2	39821313	8.72482e-11	10.06	T/A	T:328_A:18	0.05
Spike length	lmm	NC_012874.2	39822191	8.72482e-11	10.06	G/C	G:328_C:18	0.05
Spike length	lmm	NC_012874.2	39824062	8.72482e-11	10.06	C/T	C:328_T:18	0.05
Spike length	lmm	NC_012874.2	39824125	8.72482e-11	10.06	G/A	G:328_A:18	0.05
Spike length	lmm	NC_012874.2	39824238	1.03479e-10	9.99	G/T	G:330_T:18	0.05
Spike length	lmm	NC_012874.2	39824781	8.72482e-11	10.06	C/T	C:328_T:18	0.05
Spike length	lmm	NC_012875.2	40137015	3.08159e-08	7.51	A/C	A:400_C:24	0.06
Spike length	lmm	NC_012875.2	40161295	3.16154e-08	7.5	C/T	C:406_T:22	0.05
Spike length	lmm	NC_012875.2	40258987	3.16154e-08	7.5	C/T	C:402_T:26	0.06
Spike length	lmm	NC_012874.2	40287372	7.48631e-09	8.13	C/T	C:220_T:208	0.49
Spike length	lmm	NC_012874.2	40287403	7.48631e-09	8.13	T/C	T:220_C:208	0.49
Spike length	lmm	NC_012874.2	40287419	7.48631e-09	8.13	G/C	G:220_C:208	0.49
Spike length	lmm	NC_012874.2	40287440	7.48631e-09	8.13	T/A	T:220_A:208	0.49
Spike length	lmm	NC_012874.2	40438290	8.72482e-11	10.06	C/G	C:328_G:18	0.05
Spike length	lmm	NC_012874.2	40440277	8.04421e-11	10.09	G/A	G:330_A:18	0.05
Spike length	lmm	NC_012874.2	40441410	8.72482e-11	10.06	C/T	C:330_T:18	0.05
Spike length	lmm	NC_012874.2	40444923	1.04684e-10	9.98	G/A	G:334_A:18	0.05
Spike length	lmm	NC_012874.2	40444956	8.72482e-11	10.06	G/A	G:328_A:18	0.05
Spike length	lmm	NC_012874.2	40445280	8.72482e-11	10.06	A/C	A:328_C:18	0.05
Spike length	lmm	NC_012874.2	40445478	8.72482e-11	10.06	G/A	G:328_A:18	0.05
Spike length	lmm	NC_012874.2	40446548	8.13354e-11	10.09	G/T	G:328_T:18	0.05
Spike length	lmm	NC_012874.2	40447568	8.72482e-11	10.06	A/T	A:326_T:18	0.05
Spike length	lmm	NC_012874.2	40448014	8.72482e-11	10.06	A/T	A:328_T:18	0.05
Spike length	lmm	NC_012874.2	40655537	8.72482e-11	10.06	C/A	C:328_A:18	0.05
Spike length	lmm	NC_012874.2	40655744	8.72482e-11	10.06	C/T	C:328_T:18	0.05
Spike length	lmm	NC_012874.2	40657112	8.72482e-11	10.06	A/G	A:328_G:18	0.05
Spike length	lmm	NC_012876.2	40707762	3.48121e-08	7.46	C/A	C:215_A:211	0.5
Spike length	lmm	NC_012875.2	40900618	3.16154e-08	7.5	C/G	C:405_G:23	0.05
Spike length	lmm	NC_012874.2	40945785	8.72482e-11	10.06	C/G	C:328_G:18	0.05
Spike length	lmm	NC_012874.2	40948490	9.14708e-11	10.04	C/T	C:328_T:18	0.05
Spike length	lmm	NC_012877.2	41011611	1.29713e-30	29.89	T/C	T:215_C:213	0.5
Spike length	lmm	NC_012874.2	41401506	1.27317e-10	9.9	T/C	T:334_C:18	0.05
Spike length	lmm	NC_012874.2	41404103	5.92978e-11	10.23	A/T	A:332_T:18	0.05
Spike length	lmm	NC_012874.2	41612311	7.44402e-11	10.13	C/T	C:326_T:18	0.05
Spike length	lmm	NC_012874.2	41616861	8.72482e-11	10.06	C/T	C:326_T:18	0.05
Spike length	lmm	NC_012874.2	41697063	1.94427e-11	10.71	A/G	A:206_G:222	0.48
Spike length	lmm	NC_012874.2	41755897	1.94427e-11	10.71	C/T	C:206_T:222	0.48
Spike length	lmm	NC_012874.2	41755911	1.94427e-11	10.71	T/C	T:206_C:222	0.48
Spike length	lmm	NC_012874.2	41756011	1.94427e-11	10.71	C/T	C:206_T:222	0.48
Spike length	lmm	NC_012874.2	41756031	1.94427e-11	10.71	G/A	G:206_A:222	0.48
Spike length	lmm	NC_012874.2	41756037	1.94427e-11	10.71	T/C	T:206_C:222	0.48
Spike length	lmm	NC_012874.2	41756096	1.94427e-11	10.71	T/G	T:206_G:222	0.48
Spike length	lmm	NC_012874.2	41756125	1.94427e-11	10.71	G/T	G:206_T:222	0.48
Spike length	lmm	NC_012874.2	41756192	1.94427e-11	10.71	G/A	G:206_A:222	0.48
Spike length	lmm	NC_012874.2	41888054	8.72482e-11	10.06	G/T	G:328_T:18	0.05
Spike length	lmm	NC_012875.2	42235805	3.16154e-08	7.5	C/T	C:405_T:23	0.05
Spike length	lmm	NC_012874.2	42409023	8.53753e-11	10.07	T/G	T:326_G:18	0.05
Spike length	lmm	NC_012874.2	42410263	8.53753e-11	10.07	G/A	G:326_A:18	0.05
Spike length	lmm	NC_012874.2	42411169	8.53753e-11	10.07	G/A	G:326_A:18	0.05
Spike length	lmm	NC_012874.2	42412050	8.53753e-11	10.07	C/A	C:326_A:18	0.05
Spike length	lmm	NC_012874.2	42412156	9.37763e-11	10.03	C/T	C:326_T:18	0.05
Spike length	lmm	NC_012874.2	42413779	8.53753e-11	10.07	G/T	G:326_T:18	0.05
Spike length	lmm	NC_012874.2	42414890	7.43102e-11	10.13	C/T	C:336_T:18	0.05
Spike length	lmm	NC_012874.2	42415493	5.81368e-11	10.24	C/T	C:330_T:18	0.05
Spike length	lmm	NC_012874.2	42418076	8.72482e-11	10.06	G/T	G:330_T:18	0.05
Spike length	lmm	NC_012873.2	42525917	7.48631e-09	8.13	T/C	T:220_C:208	0.49
Spike length	lmm	NC_012873.2	42526012	7.48631e-09	8.13	G/C	G:220_C:208	0.49
Spike length	lmm	NC_012873.2	42527183	1.1606e-08	7.94	T/A	T:221_A:207	0.48
Spike length	lmm	NC_012874.2	42544170	3.5036e-08	7.46	G/A	G:403_A:23	0.05
Spike length	lmm	NC_012874.2	42809227	1.59559e-11	10.8	G/A	G:406_A:22	0.05
Spike length	lmm	NC_012876.2	43213749	3.4847e-08	7.46	G/A	G:217_A:211	0.49
Spike length	lmm	NC_012874.2	43530757	6.40529e-11	10.19	G/T	G:328_T:18	0.05
Spike length	lmm	NC_012876.2	43544151	7.48631e-09	8.13	T/A	T:208_A:220	0.49
Spike length	lmm	NC_012876.2	43544273	7.48631e-09	8.13	T/C	T:208_C:220	0.49
Spike length	lmm	NC_012876.2	43544615	7.48631e-09	8.13	T/G	T:208_G:220	0.49
Spike length	lmm	NC_012876.2	43544635	7.48631e-09	8.13	G/T	G:208_T:220	0.49
Spike length	lmm	NC_012876.2	43544663	7.48631e-09	8.13	A/T	A:208_T:220	0.49
Spike length	lmm	NC_012876.2	43544951	7.48631e-09	8.13	C/G	C:208_G:220	0.49
Spike length	lmm	NC_012876.2	43546061	7.48631e-09	8.13	C/A	C:208_A:220	0.49
Spike length	lmm	NC_012874.2	43860846	8.75104e-11	10.06	G/A	G:330_A:18	0.05
Spike length	lmm	NC_012874.2	43861518	8.42401e-11	10.07	T/C	T:328_C:18	0.05
Spike length	lmm	NC_012874.2	43863828	8.53753e-11	10.07	G/A	G:326_A:18	0.05
Spike length	lmm	NC_012874.2	43863981	9.19891e-11	10.04	C/T	C:328_T:18	0.05
Spike length	lmm	NC_012874.2	43864576	4.49117e-11	10.35	A/T	A:340_T:18	0.05
Spike length	lmm	NC_012874.2	43937793	8.47744e-11	10.07	A/G	A:342_G:18	0.05
Spike length	lmm	NC_012876.2	44041070	7.48631e-09	8.13	T/A	T:220_A:208	0.49
Spike length	lmm	NC_012874.2	44166463	5.17067e-09	8.29	G/A	G:324_A:20	0.06
Spike length	lmm	NC_012874.2	44222533	8.72482e-11	10.06	T/C	T:328_C:18	0.05
Spike length	lmm	NC_012874.2	44256089	8.72482e-11	10.06	G/A	G:328_A:18	0.05
Spike length	lmm	NC_012874.2	44428269	6.6248e-11	10.18	G/C	G:332_C:18	0.05
Spike length	lmm	NC_012874.2	44734059	8.72482e-11	10.06	A/G	A:328_G:18	0.05
Spike length	lmm	NC_012874.2	44735951	1.06653e-10	9.97	A/G	A:328_G:18	0.05
Spike length	lmm	NC_012874.2	44740667	7.24719e-11	10.14	A/G	A:332_G:18	0.05
Spike length	lmm	NC_012874.2	44740750	8.72482e-11	10.06	C/T	C:326_T:18	0.05
Spike length	lmm	NC_012874.2	44832050	6.57974e-11	10.18	G/A	G:332_A:18	0.05
Spike length	lmm	NC_012874.2	44833047	8.72482e-11	10.06	C/T	C:328_T:18	0.05
Spike length	lmm	NC_012874.2	44834123	8.72482e-11	10.06	G/A	G:328_A:18	0.05
Spike length	lmm	NC_012874.2	44835331	8.72482e-11	10.06	C/A	C:330_A:18	0.05
Spike length	lmm	NC_012874.2	44838299	8.72482e-11	10.06	T/A	T:328_A:18	0.05
Spike length	lmm	NC_012874.2	44838955	8.00115e-11	10.1	T/A	T:332_A:18	0.05
Spike length	lmm	NC_012874.2	44839149	8.00115e-11	10.1	C/T	C:328_T:18	0.05
Spike length	lmm	NC_012874.2	44839225	8.72482e-11	10.06	C/T	C:330_T:18	0.05
Spike length	lmm	NC_012874.2	44842200	8.72482e-11	10.06	C/G	C:326_G:18	0.05
Spike length	lmm	NC_012876.2	44885090	8.18612e-09	8.09	A/G	A:215_G:203	0.49
Spike length	lmm	NC_012874.2	44926889	1.5143e-09	8.82	C/T	C:331_T:19	0.05
Spike length	lmm	NC_012874.2	44928974	8.72482e-11	10.06	G/A	G:328_A:18	0.05
Spike length	lmm	NC_012874.2	44929878	1.16305e-10	9.93	C/G	C:330_G:18	0.05
Spike length	lmm	NC_012874.2	44930789	7.26593e-11	10.14	C/A	C:332_A:18	0.05
Spike length	lmm	NC_012874.2	44934703	8.72482e-11	10.06	G/A	G:330_A:18	0.05
Spike length	lmm	NC_012874.2	45157548	8.72482e-11	10.06	A/T	A:326_T:18	0.05
Spike length	lmm	NC_012874.2	45272528	8.72482e-11	10.06	G/T	G:328_T:18	0.05
Spike length	lmm	NC_012874.2	45313180	6.90097e-14	13.16	G/A	G:342_A:18	0.05
Spike length	lmm	NC_012874.2	45318206	2.69552e-08	7.57	G/A	G:341_A:19	0.05
Spike length	lmm	NC_012874.2	45389685	1.94427e-11	10.71	T/G	T:206_G:222	0.48
Spike length	lmm	NC_012874.2	45561928	8.72482e-11	10.06	G/A	G:328_A:18	0.05
Spike length	lmm	NC_012874.2	45563312	8.72482e-11	10.06	G/A	G:330_A:18	0.05
Spike length	lmm	NC_012874.2	45564650	7.61856e-11	10.12	G/A	G:328_A:18	0.05
Spike length	lmm	NC_012874.2	45565414	8.72482e-11	10.06	A/T	A:328_T:18	0.05
Spike length	lmm	NC_012874.2	45606074	1.14805e-10	9.94	A/G	A:328_G:18	0.05
Spike length	lmm	NC_012874.2	45608691	9.9145e-11	10	G/A	G:332_A:18	0.05
Spike length	lmm	NC_012874.2	45620041	4.89457e-11	10.31	G/A	G:332_A:18	0.05
Spike length	lmm	NC_012874.2	45620794	8.72482e-11	10.06	G/T	G:330_T:18	0.05
Spike length	lmm	NC_012874.2	45620873	8.72482e-11	10.06	G/A	G:328_A:18	0.05
Spike length	lmm	NC_012874.2	45655833	3.0328e-11	10.52	A/G	A:328_G:20	0.06
Spike length	lmm	NC_012870.2	45656137	7.60771e-09	8.12	C/A	C:215_A:203	0.49
Spike length	lmm	NC_012870.2	45656391	7.48631e-09	8.13	C/T	C:220_T:208	0.49
Spike length	lmm	NC_012870.2	45656509	7.48631e-09	8.13	A/G	A:220_G:208	0.49
Spike length	lmm	NC_012870.2	45656793	7.48631e-09	8.13	G/A	G:218_A:208	0.49
Spike length	lmm	NC_012870.2	45657082	7.48631e-09	8.13	A/T	A:220_T:208	0.49
Spike length	lmm	NC_012870.2	45657297	7.48631e-09	8.13	G/A	G:220_A:208	0.49
Spike length	lmm	NC_012870.2	45657549	7.48631e-09	8.13	G/C	G:220_C:208	0.49
Spike length	lmm	NC_012870.2	45657684	7.48631e-09	8.13	A/C	A:220_C:208	0.49
Spike length	lmm	NC_012870.2	45657821	7.48631e-09	8.13	A/T	A:220_T:208	0.49
Spike length	lmm	NC_012870.2	45657827	7.48631e-09	8.13	T/G	T:220_G:208	0.49
Spike length	lmm	NC_012870.2	45657863	7.48631e-09	8.13	T/G	T:220_G:208	0.49
Spike length	lmm	NC_012870.2	45670191	7.48631e-09	8.13	T/C	T:220_C:208	0.49
Spike length	lmm	NC_012870.2	45670874	7.48631e-09	8.13	T/G	T:220_G:208	0.49
Spike length	lmm	NC_012870.2	45671129	7.48631e-09	8.13	G/C	G:220_C:208	0.49
Spike length	lmm	NC_012874.2	45745931	8.72482e-11	10.06	G/C	G:328_C:18	0.05
Spike length	lmm	NC_012874.2	45795019	8.65546e-11	10.06	G/A	G:328_A:18	0.05
Spike length	lmm	NC_012874.2	45795220	8.51493e-11	10.07	G/T	G:330_T:18	0.05
Spike length	lmm	NC_012874.2	45811107	1.1057e-10	9.96	A/G	A:336_G:18	0.05
Spike length	lmm	NC_012874.2	45811203	5.81368e-11	10.24	G/A	G:328_A:18	0.05
Spike length	lmm	NC_012874.2	45811454	8.72482e-11	10.06	G/A	G:326_A:18	0.05
Spike length	lmm	NC_012874.2	45814147	8.53753e-11	10.07	T/G	T:326_G:18	0.05
Spike length	lmm	NC_012874.2	45823253	8.72482e-11	10.06	G/T	G:328_T:18	0.05
Spike length	lmm	NC_012874.2	45824368	5.36179e-11	10.27	C/T	C:328_T:18	0.05
Spike length	lmm	NC_012874.2	45824675	7.32158e-11	10.14	G/A	G:338_A:18	0.05
Spike length	lmm	NC_012874.2	45824898	6.52035e-11	10.19	C/T	C:340_T:18	0.05
Spike length	lmm	NC_012874.2	45841565	1.77679e-11	10.75	A/G	A:204_G:220	0.48
Spike length	lmm	NC_012874.2	45854469	8.28567e-11	10.08	T/G	T:328_G:18	0.05
Spike length	lmm	NC_012871.2	45906431	2.76567e-10	9.56	G/A	G:406_A:22	0.05
Spike length	lmm	NC_012874.2	45925651	8.58008e-11	10.07	G/A	G:338_A:18	0.05
Spike length	lmm	NC_012876.2	46079183	5.56375e-11	10.25	T/C	T:209_C:215	0.49
Spike length	lmm	NC_012874.2	46130677	4.81992e-09	8.32	T/C	T:403_C:23	0.05
Spike length	lmm	NC_012878.2	46336905	4.39197e-10	9.36	G/A	G:402_A:22	0.05
Spike length	lmm	NC_012876.2	46678809	7.62935e-11	10.12	T/C	T:397_C:23	0.05
Spike length	lmm	NC_012874.2	46689991	6.4107e-11	10.19	G/A	G:338_A:18	0.05
Spike length	lmm	NC_012874.2	47026721	1.22695e-10	9.91	A/C	A:328_C:18	0.05
Spike length	lmm	NC_012874.2	47086804	3.02217e-11	10.52	G/A	G:223_A:203	0.48
Spike length	lmm	NC_012874.2	47088357	1.94427e-11	10.71	T/C	T:223_C:205	0.48
Spike length	lmm	NC_012874.2	47098136	1.94427e-11	10.71	T/C	T:223_C:205	0.48
Spike length	lmm	NC_012874.2	47112093	3.07303e-09	8.51	C/T	C:224_T:204	0.48
Spike length	lmm	NC_012874.2	47199987	1.94427e-11	10.71	G/T	G:205_T:223	0.48
Spike length	lmm	NC_012874.2	47203000	1.94427e-11	10.71	C/T	C:223_T:205	0.48
Spike length	lmm	NC_012876.2	47505824	7.48631e-09	8.13	A/T	A:208_T:220	0.49
Spike length	lmm	NC_012870.2	47558016	7.48631e-09	8.13	C/T	C:220_T:208	0.49
Spike length	lmm	NC_012877.2	47586917	7.48631e-09	8.13	T/C	T:220_C:208	0.49
Spike length	lmm	NC_012877.2	47586935	7.48631e-09	8.13	G/A	G:220_A:208	0.49
Spike length	lmm	NC_012874.2	47680339	8.72482e-11	10.06	G/A	G:328_A:18	0.05
Spike length	lmm	NC_012874.2	47818017	1.22745e-10	9.91	G/A	G:338_A:18	0.05
Spike length	lmm	NC_012874.2	47900645	7.46287e-11	10.13	A/C	A:332_C:18	0.05
Spike length	lmm	NC_012874.2	47900681	8.28567e-11	10.08	A/G	A:326_G:18	0.05
Spike length	lmm	NC_012874.2	47900848	8.72482e-11	10.06	T/A	T:328_A:18	0.05
Spike length	lmm	NC_012874.2	48175153	6.7611e-11	10.17	A/G	A:326_G:18	0.05
Spike length	lmm	NC_012876.2	48829222	9.75557e-09	8.01	G/A	G:406_A:22	0.05
Spike length	lmm	NC_012876.2	49247969	7.48631e-09	8.13	T/A	T:208_A:220	0.49
Spike length	lmm	NC_012876.2	49248149	7.48631e-09	8.13	A/T	A:208_T:220	0.49
Spike length	lmm	NC_012876.2	49248441	7.48631e-09	8.13	T/C	T:208_C:220	0.49
Spike length	lmm	NC_012876.2	49249825	7.48631e-09	8.13	G/C	G:220_C:208	0.49
Spike length	lmm	NC_012876.2	49250172	7.48631e-09	8.13	A/G	A:208_G:220	0.49
Spike length	lmm	NC_012876.2	49250801	8.01119e-10	9.1	G/T	G:214_T:208	0.49
Spike length	lmm	NC_012876.2	49250908	7.48631e-09	8.13	A/G	A:208_G:220	0.49
Spike length	lmm	NC_012876.2	49297919	7.48631e-09	8.13	T/C	T:208_C:220	0.49
Spike length	lmm	NC_012870.2	49384634	2.80783e-08	7.55	C/T	C:229_T:199	0.46
Spike length	lmm	NC_012873.2	50172001	7.48631e-09	8.13	C/T	C:208_T:220	0.49
Spike length	lmm	NC_012873.2	52200522	3.18311e-08	7.5	G/A	G:395_A:21	0.05
Spike length	lmm	NC_012879.2	54189257	2.57006e-12	11.59	T/C	T:405_C:23	0.05
Spike length	lmm	NC_012879.2	54189268	1.08136e-08	7.97	C/T	C:401_T:25	0.06
Spike length	lmm	NC_012874.2	55870279	1.91667e-08	7.72	G/A	G:386_A:28	0.07
Spike length	lmm	NC_012876.2	56178797	3.38537e-09	8.47	C/T	C:377_T:25	0.06
Spike length	lmm	NC_012879.2	56992117	2.4074e-12	11.62	G/C	G:387_C:21	0.05
Spike length	lmm	NC_012879.2	57286985	1.76582e-10	9.75	T/C	T:328_C:18	0.05
Spike length	lmm	NC_012879.2	57287788	2.85582e-10	9.54	C/T	C:332_T:18	0.05
Spike length	lmm	NC_012874.2	57633713	2.27125e-11	10.64	T/C	T:359_C:19	0.05
Spike length	lmm	NC_012874.2	57730038	1.2325e-09	8.91	T/C	T:341_C:19	0.05
Spike length	lmm	NC_012874.2	58409159	9.57003e-10	9.02	C/T	C:401_T:25	0.06
Spike length	lmm	NC_012870.2	58711309	1.32284e-08	7.88	C/G	C:397_G:21	0.05
Spike length	lmm	NC_012874.2	58778631	1.25417e-08	7.9	G/A	G:400_A:26	0.06
Spike length	lmm	NC_012879.2	59124965	2.49994e-08	7.6	C/G	C:405_G:23	0.05
Spike length	lmm	NC_012870.2	62950749	8.16437e-11	10.09	G/A	G:339_A:19	0.05
Spike length	lmm	NC_012870.2	63735996	2.91194e-08	7.54	T/C	T:402_C:26	0.06
Spike length	lmm	NC_012870.2	63842502	1.20965e-09	8.92	C/G	C:390_G:26	0.06
Spike length	lmm	NC_012870.2	63911970	1.69632e-09	8.77	T/A	T:357_A:25	0.07
Spike length	lmm	NC_012870.2	63941014	1.9216e-09	8.72	C/T	C:406_T:22	0.05
Spike length	lmm	NC_012870.2	63974872	1.97025e-09	8.71	C/T	C:389_T:21	0.05
Spike length	lmm	NC_012870.2	63974962	1.63148e-09	8.79	C/T	C:395_T:21	0.05
Spike length	lmm	NC_012870.2	63975172	1.38821e-09	8.86	G/A	G:391_A:21	0.05
Spike length	lmm	NC_012870.2	63975186	1.76259e-09	8.75	T/C	T:387_C:21	0.05
Spike length	lmm	NC_012870.2	63975256	1.97025e-09	8.71	C/A	C:389_A:21	0.05
Spike length	lmm	NC_012870.2	63975270	1.97025e-09	8.71	A/T	A:389_T:21	0.05
Spike length	lmm	NC_012870.2	63975279	1.97025e-09	8.71	T/C	T:389_C:21	0.05
Spike length	lmm	NC_012870.2	63975358	1.97025e-09	8.71	T/A	T:389_A:21	0.05
Spike length	lmm	NC_012870.2	63975367	1.97025e-09	8.71	C/T	C:389_T:21	0.05
Spike length	lmm	NC_012870.2	63975373	1.97025e-09	8.71	G/A	G:389_A:21	0.05
Spike length	lmm	NC_012870.2	63976698	1.64101e-09	8.78	T/C	T:387_C:21	0.05
Spike length	lmm	NC_012870.2	64036882	1.28351e-08	7.89	C/G	C:404_G:24	0.06
Spike length	lmm	NC_012870.2	64036909	1.28351e-08	7.89	T/A	T:404_A:24	0.06
Spike length	lmm	NC_012870.2	64036931	1.28351e-08	7.89	A/C	A:404_C:24	0.06
Spike length	lmm	NC_012870.2	64052522	1.0726e-09	8.97	T/G	T:402_G:22	0.05
Spike length	lmm	NC_012870.2	64836361	8.64095e-09	8.06	T/A	T:397_A:27	0.06
Spike length	lmm	NC_012870.2	64841119	8.19643e-09	8.09	T/A	T:399_A:27	0.06
Spike length	lmm	NC_012873.2	65215666	1.64756e-09	8.78	A/C	A:334_C:18	0.05
Spike length	lmm	NC_012876.2	65383793	1.88416e-08	7.72	C/T	C:364_T:20	0.05
Spike length	lmm	NC_012876.2	65411913	8.4359e-10	9.07	C/T	C:364_T:20	0.05
Spike length	lmm	NC_012876.2	65413118	6.85248e-10	9.16	A/C	A:366_C:20	0.05
Spike length	lmm	NC_012876.2	65414971	6.85248e-10	9.16	T/A	T:366_A:20	0.05
Spike length	lmm	NC_012876.2	65423626	6.85248e-10	9.16	G/A	G:366_A:20	0.05
Spike length	lmm	NC_012876.2	65423804	1.00359e-09	9	G/A	G:364_A:20	0.05
Spike length	lmm	NC_012872.2	72466748	7.70659e-09	8.11	A/G	A:398_G:24	0.06
Spike length	lmm	NC_012871.2	76380755	1.32605e-10	9.88	A/G	A:210_G:218	0.49
Spike length	lmm	NC_012870.2	78754636	1.29713e-30	29.89	C/T	C:215_T:213	0.5

## Sheet: Number of internodes
Trait	Model	Chr	Pos	Pvalue	'-log10P	Allele	Count	MAF
Number of internodes	lmm	NC_012878.2	41748026	3.26775e-08	7.49	C/T	C:392_T:30	0.07
Number of internodes	lmm	NC_012876.2	50967745	2.30307e-08	7.64	G/A	G:316_A:106	0.25

## Sheet: 100-grain weight
Trait	Model	Chr	Pos	Pvalue	'-log10P	Allele	Count	MAF
