# Supplementary material for: The Identification of a Yield-Related Gene Controlling Multiple Traits Using GWAS in Sorghum (Sorghum bicolor L.)
Source: Plants (Basel). 2023 Apr 4;12(7):1557. doi: 10.3390/plants12071557 (PMC10097259; doi:10.3390/plants12071557)
Supplement: Supplementary file 1 [file plants-12-01557-s001.zip › Table S8.xlsx]

## Sheet: Table S8
Table S8 All genes in the LD block.
Chromosome	Start	Stop	Length	Gene ID	Description
NC_012877	52638040	52642901	4861	ID=gene:SORBI_3008G116300	hypothetical protein
NC_012877	52643796	52646872	3076	ID=gene:SORBI_3008G116400	hypothetical protein
NC_012877	52649039	52651734	2695	ID=gene:SORBI_3008G116500	description=VIP5
NC_012877	52652294	52655164	2870	ID=gene:SORBI_3008G116600	hypothetical protein
NC_012877	52656486	52665574	9088	ID=gene:SORBI_3008G116700	hypothetical protein
NC_012877	52665984	52667281	1297	ID=gene:SORBI_3008G116800	hypothetical protein
NC_012877	52668120	52669601	1481	ID=gene:SORBI_3008G116900	hypothetical protein
NC_012877	52701740	52711594	9854	ID=gene:SORBI_3008G117000	hypothetical protein
NC_012877	52716522	52719365	2843	ID=gene:SORBI_3008G117100	hypothetical protein
NC_012877	52723465	52728930	5465	ID=gene:SORBI_3008G117200	hypothetical protein
NC_012877	52741409	52741726	317	ID=gene:SORBI_3008G117300	hypothetical protein
NC_012877	52805355	52806164	809	ID=gene:SORBI_3008G117400	hypothetical protein
NC_012877	52821183	52824493	3310	ID=gene:SORBI_3008G117600	hypothetical protein
NC_012877	52957214	52957974	760	ID=gene:SORBI_3008G117800	hypothetical protein
NC_012877	52979837	52980295	458	ID=gene:SORBI_3008G117900	hypothetical protein
NC_012877	52984566	52985789	1223	ID=gene:SORBI_3008G118000	hypothetical protein
NC_012877	53001391	53002319	928	ID=gene:SORBI_3008G118050	hypothetical protein
NC_012877	53044929	53050870	5941	ID=gene:SORBI_3008G118100	hypothetical protein
NC_012877	53059491	53066424	6933	ID=gene:SORBI_3008G118200	description=Golgin candidate 6
NC_012877	53070840	53074063	3223	ID=gene:SORBI_3008G118300	hypothetical protein
NC_012877	53077685	53084505	6820	ID=gene:SORBI_3008G118400	hypothetical protein
NC_012877	53085214	53089215	4001	ID=gene:SORBI_3008G118500	hypothetical protein
NC_012877	53089286	53091813	2527	ID=gene:SORBI_3008G118600	hypothetical protein
