# Supplementary material for: The Identification of a Yield-Related Gene Controlling Multiple Traits Using GWAS in Sorghum (Sorghum bicolor L.)
Source: Plants (Basel). 2023 Apr 4;12(7):1557. doi: 10.3390/plants12071557 (PMC10097259; doi:10.3390/plants12071557)
Supplement: Supplementary file 1 [file plants-12-01557-s001.zip › Table S9.xlsx]

## Sheet: Table S9
Table S9 The all variations of three haplotypes.
Alleles	A/G	G/A	C/G	G/A	T/C	G/A	G/A	T/G	T/A	C/T	T/G	T/C	C/T	C/T	T/C	C/G	C/T
Chromosome	NC_012877	NC_012877	NC_012877	NC_012877	NC_012877	NC_012877	NC_012877	NC_012877	NC_012877	NC_012877	NC_012877	NC_012877	NC_012877	NC_012877	NC_012877	NC_012877	NC_012877
Position	52646698	52646814	52646823	52646934	52646967	52647038	52647068	52647101	52647162	52647687	52647819	52647935	52648278	52648600	52648852	52649225	52649857
Hap1	A	A	G	G	T	G	A	T	T	C	T	T	T	C	C	G	C
Hap2	G	G	C	G	T	G	G	G	A	C	G	C	C	T	T	C	C
Hap3	A	G	C	A	C	A	G	T	T	T	T	T	C	C	T	C	T
